# Supplementary material
Source: PubMed Central journal article supplement (PMC4370790)
Supplement: NIHMS668575-supplement-supplement_1.pdf [file NIHMS668575-supplement-supplement_1.pdf]

**A TRIM24 expression in TCGA BRCA**

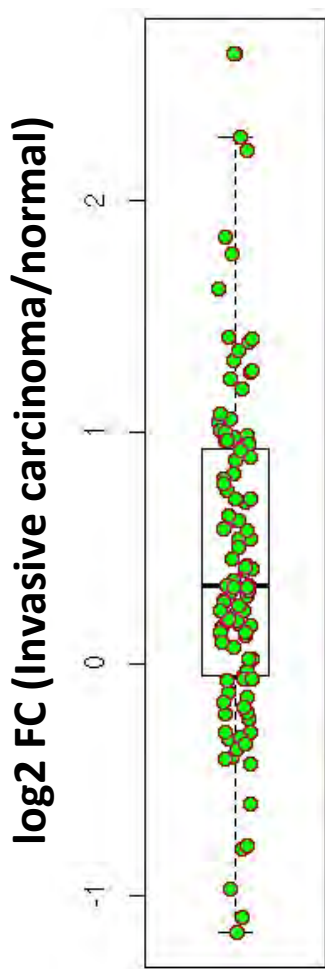

**Paired Samples**

- Fold change > 0 for 78 of 106 (73%) patients with paired profiles
- 40 out of 106 (37.8%) patients have fold change > 1.5

**B**

**Top 30% vs. Bottom 70%**

| TRIM24 => | High Exp | Low Exp |
|-----------|----------|---------|
| LumA      | 107      | 325     |
| LumB      | 77       | 117     |
| Basal     | 66       | 74      |
| Her2      | 31       | 36      |

**p-value: 1.32e-07**

| TRIM24 => | High Exp | Low Exp |
|-----------|----------|---------|
| LumA      | 107      | 325     |
| Not LumA  | 174      | 227     |

**p-value: 1.46e-08; Odds ratio: 0.43**

| TRIM24 => | High Exp | Low Exp |
|-----------|----------|---------|
| Lum B     | 77       | 117     |
| Not LumB  | 204      | 435     |

**p-value: 0.047; odds ratio: 1.40**

| TRIM24 => | High Exp | Low Exp |
|-----------|----------|---------|
| Basal     | 66       | 74      |
| Not Basal | 215      | 478     |

**p-value: 3.8e-04; Odds ratio: 1.98**

| TRIM24 => | High Exp | Low Exp |
|-----------|----------|---------|
| Her2      | 31       | 36      |
| Not Her2  | 250      | 516     |

**p-value: 0.03; Odds ratio: 1.78**

**Key:**

LumA: ER+, PR+, HER2-  
LumB: ER+, PR+, HER2+  
HER2: ER-, PR-, HER2+  
Basal: ER-, PR-, HER2-

A

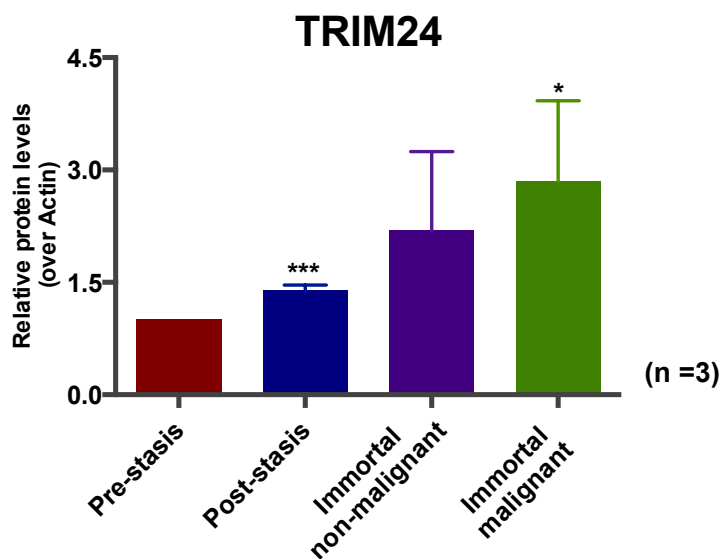

B

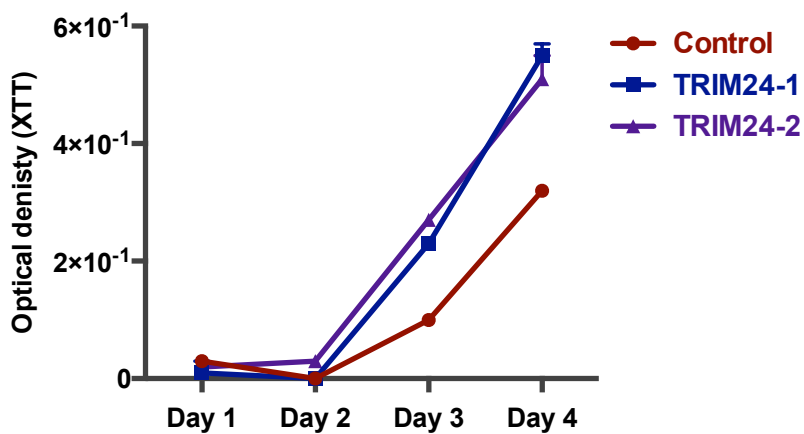

## Control

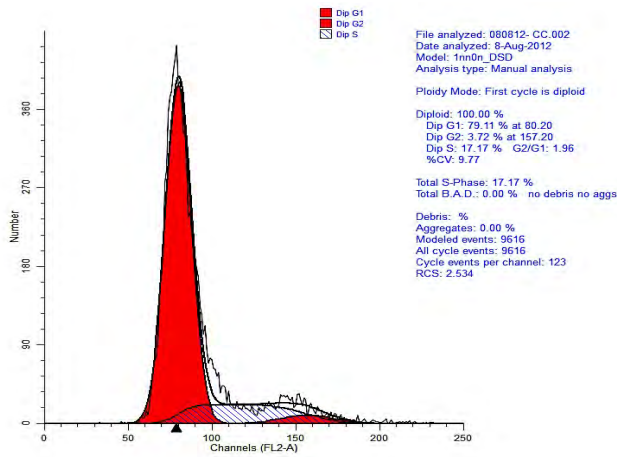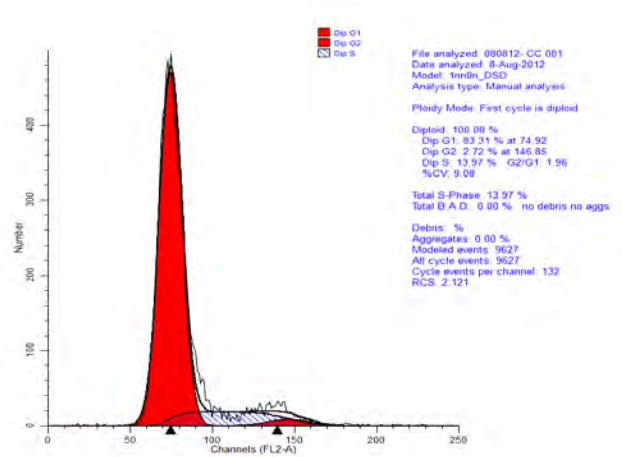

## TRIM24-1

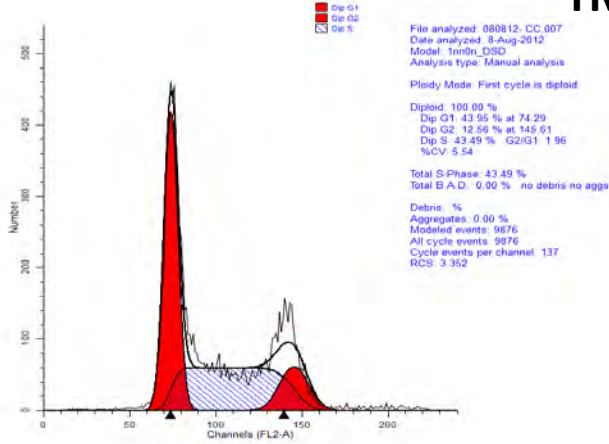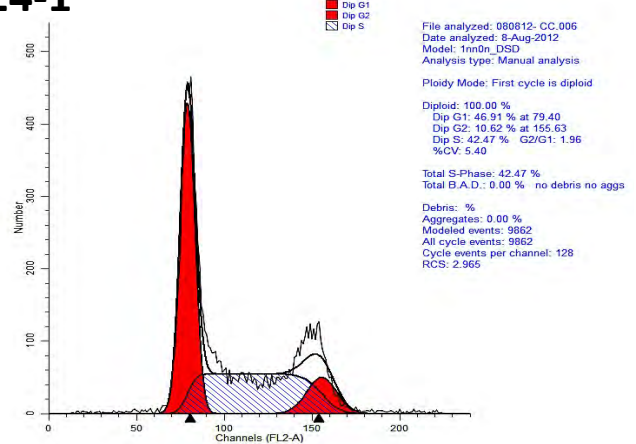

## TRIM24-2

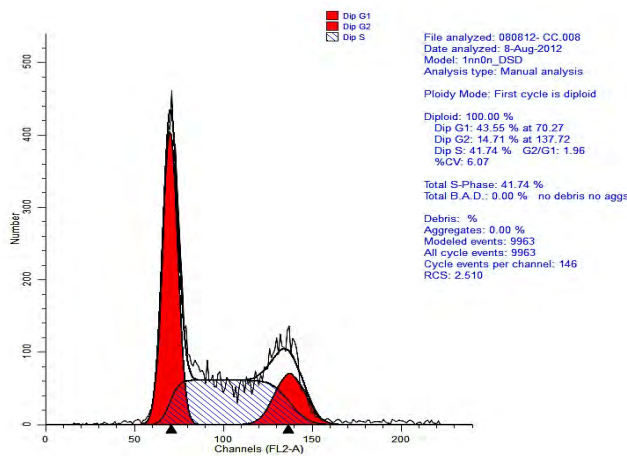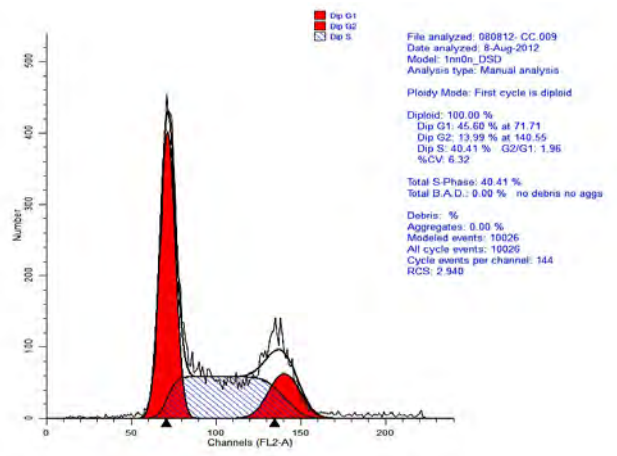

**A**

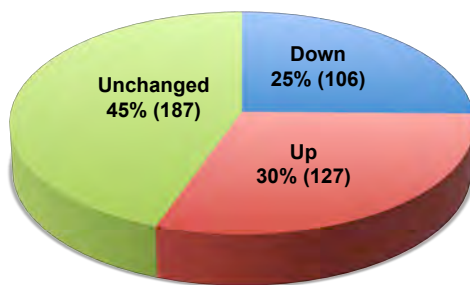

**B**

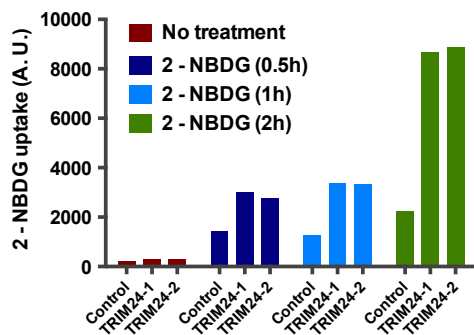

**C**

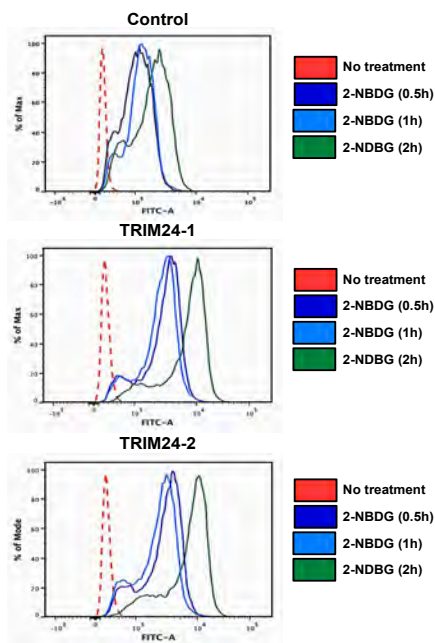

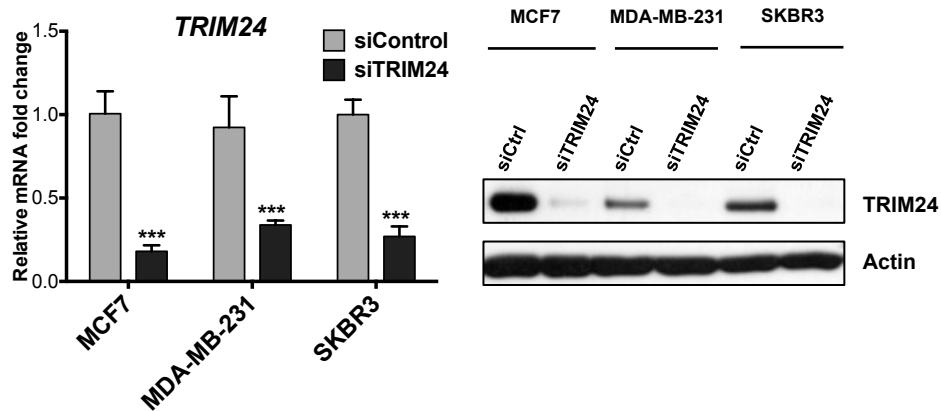

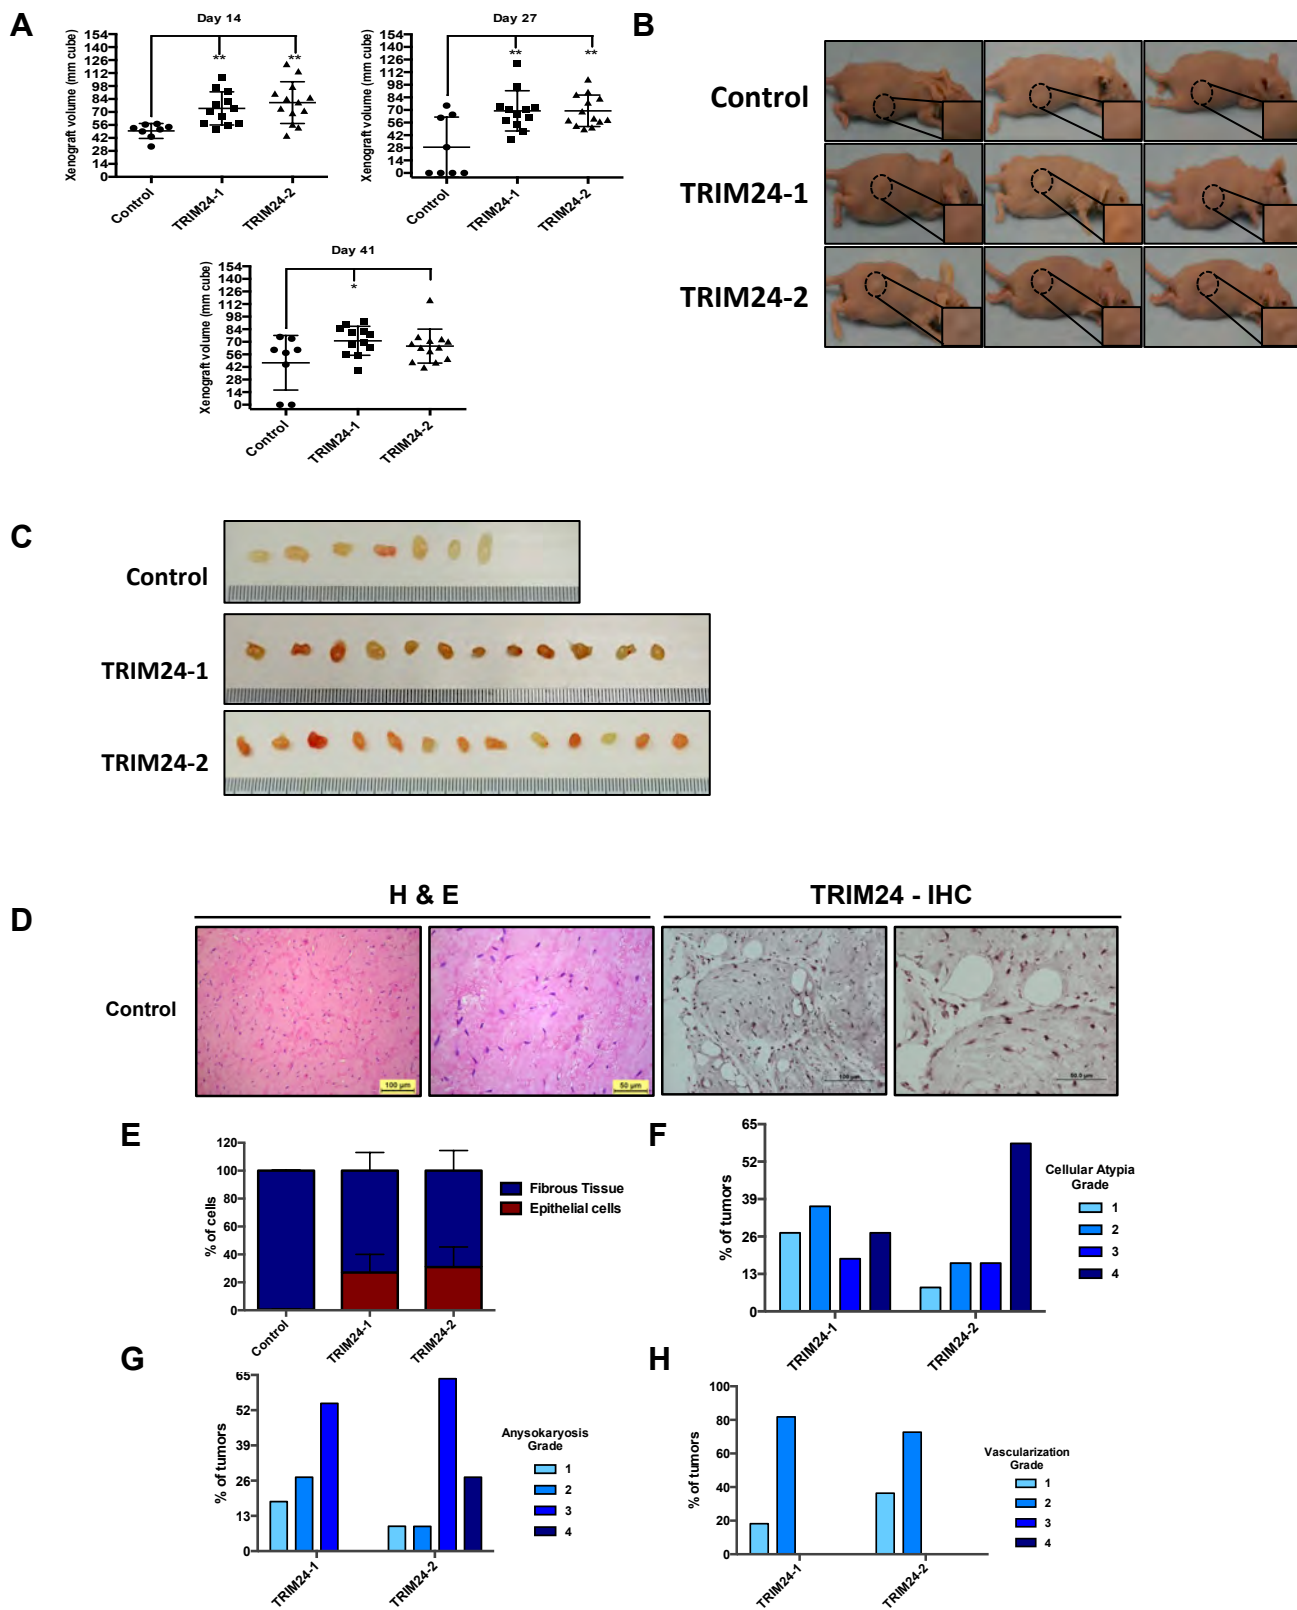

# T1

|          | Status    | All red score | Status    | All red score | Status     | All red score | Status      | All red score | Status | All red score | Status | All red score |
|----------|-----------|---------------|-----------|---------------|------------|---------------|-------------|---------------|--------|---------------|--------|---------------|
| position | ER status | ER            | PR status | PR            | P53 status | P53           | Ki67 status | Ki67          | HER2   | HER2          | TRIM24 | Trim24 status |
| A11      | 0         | 0             | 0         | 0             | 0          | 0             | 0           | 0             | 0      | 0             | 0      | 0             |
| A13      | 1         | 3             | 1         | 4             | 0          | 1             | 0           | 1             | 1      | 2             | 1      | 0             |
| A15      | 1         | 3             | 1         | 3             | 0          | 1             | 0           | 1             | 0      | 0             | 3      | 1             |
| A7       | 1         | 4             | 1         | 6             | 0          | 1             | 0           | 2             | 0      | 0             | 3      | 1             |
| A9       | 0         | 1             | 1         | 4             | 0          | 1             | 0           | 2             | 0      | 0             | 1      | 0             |
| B10      | 1         | 6             | 0         | 1             | 1          | 7             | 0           | 1             | 1      | 2             | 6      | 2             |
| B12      | 1         | 8             | 1         | 7             | 0          | 0             | 0           | 2             | 1      | 2             | 6      | 2             |
| B14      | 0         | 0             | 0         | 0             | 1          | 7             | 1           | 5             | 1      | 3             | 5      | 1             |
| B2       | 0         | 0             | 0         | 0             | 0          | 0             | 1           | 8             | 0      | 0             | 2      | 0             |
| B4       | 1         | 7             | 1         | 8             | 0          | 0             | 0           | 2             | 0      | 1             | 4      | 1             |
| B6       | 0         | 0             | 0         | 0             | 1          | 8             | 1           | 3             | 1      | 3             | 4      | 1             |
| B8       | 0         | 0             | 1         | 8             | 0          | 1             | 0           | 2             | 1      | 2             | 6      | 2             |
| C1       | 1         | 4             | 0         | 1             | 1          | 5             | 1           | 5             | 1      | 3             | 6      | 2             |
| C11      | 0         | 1             | 0         | 0             | 0          | 1             | 1           | 3             | 1      | 2             | 2      | 0             |
| C13      | 1         | 6             | 0         | 1             | 1          | 4             | 1           | 5             | 1      | 3             | 5      | 1             |
| C15      | 1         | 4             | 0         | 1             | 1          | 3             | 1           | 3             | 1      | 3             | 4      | 1             |
| C3       | 0         | 0             | 0         | 0             | 0          | 1             | 1           | 8             | 1      | 2             | 3      | 1             |
| C5       | 0         | 0             | 0         | 0             | 0          | 0             | 1           | 7             | 1      | 2             | 1      | 0             |
| C7       | 1         | 8             | 1         | 7             | 0          | 1             | 1           | 4             | 1      | 2             | 4      | 1             |
| C9       | 0         | 0             | 0         | 0             | 1          | 4             | 0           | 2             | 1      | 2             | 5      | 1             |
| D10      | 0         | 0             | 0         | 0             | 1          | 7             | 0           | 1             | 1      | 3             | 6      | 2             |
| D12      | 1         | 4             | 0         | 0             | 1          | 3             | 0           | 2             | 1      | 2             | 6      | 2             |
| D14      | 1         | 8             | 0         | 0             | 0          | 0             | 1           | 5             | 1      | 3             | 6      | 2             |
| D2       | 0         | 0             | 0         | 0             | 1          | 8             | 1           | 8             | 0      | 0             | 2      | 0             |
| D4       | 1         | 8             | 1         | 8             | 0          | 1             | 1           | 3             | 1      | 2             | 6      | 2             |
| D6       | 1         | 3             | 0         | 0             | 0          | 0             | 1           | 3             | 1      | 2             | 6      | 2             |
| D8       | 1         | 8             | 1         | 8             | 0          | 1             | 1           | 7             | 1      | 2             | 8      | 2             |
| E1       | 1         | 3             | 0         | 1             | 1          | 6             | 1           | 6             | 1      | 2             | 2      | 0             |
| E11      | 1         | 8             | 0         | 0             | 0          | 2             | 1           | 6             | 1      | 2             | 4      | 1             |
| E13      | 1         | 8             | 1         | 5             | 0          | 2             | 1           | 3             | 1      | 3             | 8      | 2             |
| E15      | 1         | 7             | 0         | 2             | 1          | 6             | 1           | 4             | 1      | 2             | 3      | 1             |
| E3       | 1         | 6             | 1         | 3             | 0          | 0             | 0           | 1             | 0      | 1             | 2      | 0             |
| E5       | 0         | 0             | 0         | 0             | 0          | 1             | 1           | 7             | 1      | 3             | 3      | 1             |
| E7       | 1         | 8             | 1         | 7             | 0          | 0             | 1           | 7             | 1      | 3             | 6      | 2             |
| E9       | 1         | 4             | 1         | 3             | 1          | 8             | 1           | 6             | 1      | 3             | 4      | 1             |
| F10      | 1         | 6             | 0         | 0             | 1          | 6             | 1           | 5             | 1      | 2             | 6      | 2             |
| F12      | 0         | 0             | 0         | 0             | 1          | 8             | 1           | 8             | 1      | 2             | 6      | 2             |
| F14      | 1         | 8             | 0         | 2             | 0          | 0             | 0           | 2             | 1      | 2             | 4      | 1             |
| F2       | 0         | 0             | 0         | 0             | 1          | 8             | 1           | 8             | 1      | 3             | 6      | 2             |
| F4       | 0         | 0             | 0         | 0             | 0          | 1             | 0           | 1             | 1      | 3             | 6      | 2             |
| F6       | 0         | 0             | 1         | 5             | 0          | 0             | 1           | 6             | 1      | 2             | 3      | 1             |
| F8       | 0         | 0             | 1         | 6             | 0          | 1             | 1           | 4             | 1      | 3             | 6      | 2             |
| G1       | 0         | 2             | 1         | 3             | 1          | 5             | 1           | 7             | 1      | 3             | 5      | 1             |
| G11      | 0         | 0             | 0         | 0             | 1          | 7             | 0           | 1             | 0      | 0             | 2      | 0             |
| G13      | 0         | 0             | 1         | 6             | 0          | 1             | 0           | 1             | 0      | 1             | 0      | 0             |
| G15      | 1         | 7             | 1         | 3             | 1          | 3             | 1           | 4             | 1      | 2             | 4      | 1             |
| G3       | 0         | 0             | 0         | 0             | 1          | 5             | 1           | 4             | 1      | 2             | 3      | 1             |
| G5       | 0         | 1             | 0         | 0             | 1          | 6             | 1           | 7             | 1      | 3             | 4      | 1             |
| G7       | 0         | 0             | 0         | 0             | 0          | 0             | 1           | 5             | 0      | 1             | 3      | 1             |
| G9       | 1         | 5             | 1         | 5             | 1          | 7             | 1           | 4             | 1      | 3             | 5      | 1             |
| H10      | 1         | 8             | 1         | 8             | 0          | 0             | 1           | 5             | 1      | 2             | 6      | 2             |
| H12      | 0         | 0             | 1         | 8             | 0          | 0             | 1           | 4             | 0      | 0             | 4      | 1             |
| H14      | 1         | 7             | 1         | 8             | 1          | 3             | 1           | 8             | 1      | 3             | 6      | 2             |
| H2       | 0         | 0             | 0         | 0             | 1          | 4             | 1           | 3             | 1      | 2             | 3      | 1             |
| H4       | 0         | 0             | 0         | 0             | 1          | 4             | 0           | 1             | 0      | 0             | 3      | 1             |
| H6       | 0         | 0             | 0         | 0             | 1          | 6             | 0           | 1             | 0      | 1             | 3      | 1             |
| H8       | 0         | 0             | 0         | 0             | 0          | 2             | 1           | 6             | 0      | 1             | 1      | 0             |
| I1       | 0         | 0             | 0         | 2             | 1          | 4             | 1           | 5             | 1      | 3             | 3      | 1             |
| I11      | 0         | 0             | 0         | 0             | 1          | 4             | 1           | 5             | 0      | 0             | 1      | 0             |
| I13      | 0         | 0             | 0         | 0             | 0          | 0             | 0           | 2             | 0      | 0             | 2      | 0             |
| I15      | 0         | 0             | 0         | 0             | 0          | 1             | 1           | 6             | 1      | 3             | 3      | 1             |
| I3       | 0         | 0             | 0         | 0             | 0          | 1             | 0           | 0             | 0      | 0             | 1      | 0             |
| I5       | 1         | 8             | 1         | 7             | 0          | 0             | 0           | 1             | 1      | 2             | 7      | 2             |
| I7       | 0         | 0             | 0         | 0             | 0          | 1             | 1           | 5             | 1      | 3             | 3      | 1             |
| I9       | 0         | 0             | 0         | 1             | 1          | 3             | 1           | 6             | 1      | 2             | 4      | 1             |
| J10      | 0         | 0             | 0         | 0             | 0          | 0             | 1           | 7             | 1      | 2             | 5      | 1             |
| J12      | 0         | 0             | 0         | 0             | 0          | 1             | 1           | 8             | 1      | 2             | 4      | 1             |
| J14      | 0         | 0             | 0         | 0             | 0          | 0             | 1           | 6             | 1      | 2             | 3      | 1             |
| J2       | 0         | 0             | 0         | 0             | 1          | 8             | 1           | 8             | 0      | 1             | 2      | 0             |
| J4       | 0         | 0             | 0         | 0             | 1          | 3             | 1           | 7             | 0      | 1             | 2      | 0             |
| J6       | 0         | 0             | 0         | 2             | 0          | 0             | 1           | 4             | 0      | 1             | 1      | 0             |
| J8       | 0         | 0             | 0         | 0             | 1          | 6             | 1           | 5             | 0      | 0             | 3      | 1             |

**TRIM24 Analysis**

|           |       | low | TRIM24<br>medium | High | Total |            |        |
|-----------|-------|-----|------------------|------|-------|------------|--------|
| ER status | low   | 15  | 22               | 6    | 43    | Chi-square | 11.87  |
|           | high  | 3   | 12               | 14   | 29    | P-value    | 0.0026 |
|           | Total | 18  | 34               | 20   | 72    |            |        |

| Key          |            |            |
|--------------|------------|------------|
| TRIM24       | ER/PR      | HER2       |
| low (0-2)    | low(0-3)   | low (0-1)  |
| medium (3-5) | high (3-8) | High (2-3) |
| high (6-8)   |            |            |

|           |       | low | TRIM24<br>medium | High | Total |            |        |
|-----------|-------|-----|------------------|------|-------|------------|--------|
| PR status | low   | 14  | 24               | 10   | 48    | Chi-square | 3.74   |
|           | high  | 4   | 10               | 10   | 24    | P-value    | 0.1541 |
|           | Total | 18  | 34               | 20   | 72    |            |        |

|             |       | low | TRIM24<br>medium | High | Total |            |        |
|-------------|-------|-----|------------------|------|-------|------------|--------|
| HER2 status | low   | 14  | 8                | 0    | 22    | Chi-square | 28.51  |
|             | high  | 4   | 26               | 20   | 50    | P-value    | <.0001 |
|             | Total | 18  | 34               | 20   | 72    |            |        |

|     |       | low | TRIM24<br>medium | High | Total |            |        |
|-----|-------|-----|------------------|------|-------|------------|--------|
| P53 | low   | 12  | 16               | 12   | 40    | Chi-square | 2.05   |
|     | high  | 6   | 18               | 8    | 32    | P-value    | 0.3588 |
|     | Total | 18  | 34               | 20   | 72    |            |        |

|      |       | low | TRIM24<br>medium | High | Total |            |        |
|------|-------|-----|------------------|------|-------|------------|--------|
| Ki67 | low   | 8   | 7                | 7    | 22    | Chi-square | 3.41   |
|      | high  | 10  | 27               | 13   | 50    | P-value    | 0.1818 |
|      | Total | 18  | 34               | 20   | 72    |            |        |

**ER Analysis**

|           |       | low | ER<br>medium | High | Total |            |        |
|-----------|-------|-----|--------------|------|-------|------------|--------|
| PR status | low   | 34  | 7            | 7    | 48    | Chi-square | 17.87  |
|           | high  | 5   | 6            | 13   | 24    | P-value    | 0.0002 |
|           | Total | 39  | 13           | 20   | 72    |            |        |

| Key          |            |            |
|--------------|------------|------------|
| ER           | PR         | HER2       |
| low (0)      | low(0-3)   | low (0-1)  |
| Medium (1-4) | high (3-8) | High (2-3) |
| High (5-8)   |            |            |

|             |       | low | ER<br>medium | High | Total |            |        |
|-------------|-------|-----|--------------|------|-------|------------|--------|
| HER2 status | low   | 17  | 3            | 2    | 22    | Chi-square | 7.45   |
|             | high  | 22  | 10           | 18   | 50    | P-value    | 0.0241 |
|             | Total | 39  | 13           | 20   | 72    |            |        |

|     |       | low | ER<br>medium | High | Total |            |        |
|-----|-------|-----|--------------|------|-------|------------|--------|
| P53 | low   | 21  | 6            | 13   | 40    | Chi-square | 1.23   |
|     | high  | 18  | 7            | 7    | 32    | P-value    | 0.5406 |
|     | Total | 39  | 13           | 20   | 72    |            |        |

|      |       | low | ER<br>medium | High | Total |            |        |
|------|-------|-----|--------------|------|-------|------------|--------|
| Ki67 | low   | 11  | 5            | 6    | 22    | Chi-square | 0.49   |
|      | high  | 28  | 8            | 14   | 50    | P-value    | 0.7827 |
|      | Total | 39  | 13           | 20   | 72    |            |        |



## T2

### Upregulated genes

| Gene     | Control |        |        | TRIM24 |        |        | t-test | Fold change |
|----------|---------|--------|--------|--------|--------|--------|--------|-------------|
|          | A       | B      | C      | A      | B      | C      |        |             |
| TRIM39   | 0.00    | 167.49 | 132.51 | 605.68 | 572.34 | 591.15 | 0.00   | 5.9         |
| PDE4DIP  | 0.00    | 219.12 | 80.88  | 833.22 | 376.66 | 408.42 | 0.05   | 5.4         |
| GLS2     | 236.96  | 35.30  | 27.74  | 518.79 | 374.78 | 469.60 | 0.01   | 4.5         |
| PRKCI    | 91.91   | 92.75  | 115.34 | 397.29 | 440.82 | 450.99 | 0.00   | 4.3         |
| PRKCH    | 75.47   | 97.49  | 127.04 | 369.65 | 389.17 | 473.85 | 0.00   | 4.1         |
| CAMKK2   | 117.28  | 87.50  | 95.22  | 462.87 | 391.28 | 374.84 | 0.00   | 4.1         |
| SgK494   | 0.00    | 202.37 | 97.63  | 525.91 | 415.23 | 285.19 | 0.03   | 4.1         |
| TESK2    | 0.00    | 84.47  | 215.53 | 370.71 | 330.23 | 496.93 | 0.02   | 4.0         |
| MYC      | 84.91   | 106.26 | 108.84 | 336.89 | 370.51 | 392.51 | 0.00   | 3.7         |
| MAPKAPK5 | 70.14   | 94.23  | 135.63 | 331.82 | 317.40 | 397.15 | 0.00   | 3.5         |
| STRADA   | 21.47   | 168.55 | 109.99 | 285.93 | 384.41 | 290.46 | 0.01   | 3.2         |
| ME3      | 17.33   | 172.80 | 109.87 | 310.73 | 288.43 | 353.48 | 0.01   | 3.2         |
| FGFR2    | 100.45  | 114.59 | 84.96  | 273.19 | 277.81 | 358.25 | 0.00   | 3.0         |
| TTL      | 84.61   | 111.39 | 104.00 | 293.80 | 305.09 | 309.23 | 0.00   | 3.0         |
| DDX5     | 90.50   | 124.69 | 84.81  | 357.23 | 258.22 | 290.89 | 0.00   | 3.0         |
| TRIM26   | 44.07   | 142.46 | 113.47 | 260.31 | 272.90 | 327.49 | 0.01   | 2.9         |
| CEBPA    | 90.19   | 111.15 | 98.66  | 266.75 | 298.82 | 274.99 | 0.00   | 2.8         |
| TRIM37   | 85.26   | 113.30 | 101.44 | 292.72 | 278.46 | 264.67 | 0.00   | 2.8         |
| TRIM39   | 84.33   | 116.55 | 99.12  | 296.83 | 235.94 | 284.93 | 0.00   | 2.7         |
| MTOR     | 57.47   | 135.06 | 107.47 | 218.24 | 306.41 | 280.85 | 0.01   | 2.7         |
| PIK3CA   | 63.52   | 93.07  | 143.41 | 254.09 | 241.62 | 309.69 | 0.01   | 2.7         |
| BIRC3    | 98.26   | 102.09 | 99.65  | 288.82 | 256.61 | 243.06 | 0.00   | 2.6         |
| PTPN11   | 80.24   | 120.97 | 98.80  | 238.57 | 259.67 | 286.49 | 0.00   | 2.6         |
| PFKFB2   | 57.89   | 122.72 | 119.40 | 216.86 | 265.92 | 299.32 | 0.01   | 2.6         |
| EPHA1    | 86.47   | 88.62  | 124.92 | 274.97 | 203.83 | 302.21 | 0.01   | 2.6         |
| TTK      | 103.65  | 88.67  | 107.68 | 238.36 | 225.32 | 295.02 | 0.00   | 2.5         |
| YES1     | 80.08   | 109.47 | 110.45 | 240.24 | 247.23 | 272.17 | 0.00   | 2.5         |
| NEK6     | 99.98   | 87.87  | 112.15 | 256.38 | 207.41 | 255.11 | 0.00   | 2.4         |
| NADK     | 80.59   | 132.86 | 86.55  | 193.31 | 240.18 | 272.71 | 0.01   | 2.4         |
| STK38L   | 108.16  | 97.62  | 94.22  | 229.55 | 233.62 | 228.09 | 0.00   | 2.3         |
| CDKN2A   | 189.02  | 74.63  | 36.35  | 217.37 | 229.33 | 240.38 | 0.05   | 2.3         |
| ERN1     | 78.27   | 133.34 | 88.39  | 265.59 | 213.98 | 203.27 | 0.01   | 2.3         |
| SDHD     | 96.31   | 83.77  | 119.92 | 210.35 | 205.87 | 264.55 | 0.00   | 2.3         |
| TNK2     | 88.53   | 97.96  | 113.52 | 201.61 | 234.60 | 243.05 | 0.00   | 2.3         |
| LGR5     | 162.81  | 64.29  | 72.90  | 176.33 | 251.31 | 206.28 | 0.04   | 2.1         |
| COX6C    | 96.44   | 102.71 | 100.85 | 207.39 | 198.92 | 224.80 | 0.00   | 2.1         |
| TSC1     | 80.94   | 107.44 | 111.62 | 220.08 | 174.18 | 231.16 | 0.01   | 2.1         |
| STK38    | 71.10   | 105.05 | 123.85 | 198.54 | 203.43 | 215.53 | 0.00   | 2.1         |
| TRIM59   | 73.62   | 115.41 | 110.97 | 207.78 | 203.48 | 203.30 | 0.00   | 2.1         |
| PIP4K2A  | 80.18   | 116.42 | 103.40 | 211.78 | 196.78 | 182.02 | 0.00   | 2.0         |
| BRCA1    | 61.92   | 123.09 | 115.00 | 190.10 | 195.23 | 195.77 | 0.01   | 1.9         |
| SIX4     | 117.49  | 84.35  | 98.17  | 166.19 | 214.52 | 202.52 | 0.01   | 1.9         |
| SIK3     | 97.85   | 116.82 | 85.33  | 189.45 | 199.08 | 193.78 | 0.00   | 1.9         |
| MASTL    | 63.29   | 121.37 | 115.34 | 197.64 | 184.52 | 198.17 | 0.01   | 1.9         |
| ADRBK1   | 98.21   | 95.03  | 106.76 | 176.92 | 204.95 | 197.93 | 0.00   | 1.9         |

|          |        |        |        |        |        |        |      |     |
|----------|--------|--------|--------|--------|--------|--------|------|-----|
| MAP3K5   | 101.84 | 103.09 | 95.07  | 208.56 | 139.72 | 227.76 | 0.03 | 1.9 |
| SUFU     | 112.01 | 99.86  | 88.12  | 168.24 | 211.29 | 196.43 | 0.00 | 1.9 |
| RPIA     | 104.92 | 102.65 | 92.43  | 152.23 | 192.15 | 221.93 | 0.01 | 1.9 |
| EZH2     | 78.28  | 98.23  | 123.49 | 211.74 | 164.89 | 187.48 | 0.01 | 1.9 |
| BRD3     | 66.22  | 104.59 | 129.19 | 194.66 | 160.63 | 189.77 | 0.02 | 1.8 |
| PFKFB3   | 100.47 | 114.40 | 85.13  | 186.71 | 186.88 | 170.40 | 0.00 | 1.8 |
| TRIM8    | 110.66 | 97.48  | 91.86  | 160.42 | 184.29 | 189.82 | 0.00 | 1.8 |
| GNAQ     | 114.66 | 96.08  | 89.26  | 192.33 | 166.22 | 174.53 | 0.00 | 1.8 |
| DLAT     | 88.02  | 116.26 | 95.71  | 157.99 | 208.15 | 163.98 | 0.01 | 1.8 |
| SUZ12    | 96.47  | 92.31  | 111.22 | 162.27 | 156.41 | 208.20 | 0.01 | 1.8 |
| RPS6KB1  | 109.51 | 99.07  | 91.42  | 167.09 | 187.02 | 165.46 | 0.00 | 1.7 |
| TUBB     | 97.55  | 95.46  | 106.99 | 175.70 | 162.12 | 179.90 | 0.00 | 1.7 |
| CSK      | 74.68  | 117.18 | 108.14 | 149.28 | 207.10 | 160.90 | 0.03 | 1.7 |
| AURKB    | 86.51  | 111.06 | 102.43 | 161.71 | 188.84 | 164.13 | 0.00 | 1.7 |
| HPRT1    | 103.22 | 87.37  | 109.41 | 171.22 | 164.29 | 179.41 | 0.00 | 1.7 |
| ACLY     | 88.10  | 95.11  | 116.79 | 171.95 | 156.01 | 185.87 | 0.00 | 1.7 |
| VEGFA    | 96.71  | 95.72  | 107.56 | 161.44 | 162.53 | 182.52 | 0.00 | 1.7 |
| SDHB     | 88.47  | 96.21  | 115.32 | 159.71 | 157.81 | 183.03 | 0.00 | 1.7 |
| SNX16    | 110.81 | 94.84  | 94.35  | 175.13 | 151.39 | 174.28 | 0.00 | 1.7 |
| PIK3R4   | 76.17  | 113.25 | 110.58 | 159.56 | 168.70 | 163.27 | 0.01 | 1.6 |
| EXOSC10  | 103.90 | 92.24  | 103.86 | 182.68 | 151.99 | 153.98 | 0.00 | 1.6 |
| DDR1     | 117.47 | 98.22  | 84.31  | 163.14 | 146.66 | 177.28 | 0.01 | 1.6 |
| TIAM1    | 139.77 | 86.31  | 73.93  | 163.60 | 150.38 | 173.17 | 0.04 | 1.6 |
| CSNK1D   | 75.44  | 119.51 | 105.05 | 149.96 | 171.24 | 160.75 | 0.01 | 1.6 |
| DNMT3A   | 119.72 | 82.23  | 98.05  | 151.03 | 154.57 | 177.99 | 0.01 | 1.6 |
| NRAS     | 83.60  | 121.47 | 94.93  | 163.56 | 167.72 | 152.35 | 0.01 | 1.6 |
| MELK     | 87.94  | 104.29 | 107.77 | 137.44 | 163.73 | 174.99 | 0.01 | 1.6 |
| GSG2     | 88.51  | 106.43 | 105.06 | 160.65 | 153.49 | 164.00 | 0.00 | 1.6 |
| KRAS     | 72.02  | 113.59 | 114.40 | 163.79 | 159.94 | 150.47 | 0.02 | 1.6 |
| PAK2     | 87.05  | 101.44 | 111.51 | 143.84 | 161.38 | 161.67 | 0.00 | 1.6 |
| PANK4    | 85.52  | 100.27 | 114.21 | 162.11 | 159.11 | 147.79 | 0.00 | 1.6 |
| GMPS     | 88.50  | 103.49 | 108.01 | 157.02 | 147.45 | 161.72 | 0.00 | 1.6 |
| CHEK1    | 95.68  | 101.35 | 102.97 | 166.56 | 147.35 | 150.39 | 0.00 | 1.6 |
| PDP1     | 104.21 | 84.35  | 111.44 | 147.34 | 148.89 | 165.52 | 0.01 | 1.5 |
| SGK1     | 111.61 | 97.68  | 90.71  | 170.02 | 146.22 | 142.16 | 0.01 | 1.5 |
| MAPK8    | 106.53 | 101.84 | 91.63  | 144.52 | 149.29 | 163.98 | 0.00 | 1.5 |
| RIOK1    | 100.31 | 106.32 | 93.37  | 142.94 | 154.84 | 156.08 | 0.00 | 1.5 |
| BUB1B    | 103.13 | 90.63  | 106.24 | 167.40 | 138.12 | 140.39 | 0.01 | 1.5 |
| HIPK1    | 106.47 | 97.06  | 96.47  | 151.93 | 148.97 | 146.76 | 0.00 | 1.5 |
| DYRK1A   | 95.03  | 110.40 | 94.57  | 126.29 | 173.39 | 144.49 | 0.03 | 1.5 |
| SDHA     | 115.02 | 87.55  | 97.43  | 159.51 | 137.58 | 146.76 | 0.01 | 1.5 |
| HK1      | 69.60  | 108.27 | 122.13 | 139.79 | 145.81 | 156.05 | 0.05 | 1.5 |
| LGR4     | 92.55  | 101.35 | 106.10 | 174.12 | 134.23 | 128.84 | 0.04 | 1.5 |
| PRKAR2A  | 108.79 | 96.03  | 95.18  | 138.54 | 153.30 | 143.89 | 0.00 | 1.5 |
| SRPK1    | 77.14  | 124.73 | 98.13  | 134.12 | 147.25 | 151.52 | 0.04 | 1.4 |
| MARK2    | 112.57 | 85.94  | 101.49 | 128.35 | 137.62 | 167.43 | 0.03 | 1.4 |
| BRD8     | 95.25  | 113.48 | 91.27  | 129.06 | 142.60 | 159.09 | 0.02 | 1.4 |
| INPP4A   | 123.68 | 92.94  | 83.37  | 162.34 | 131.32 | 135.13 | 0.05 | 1.4 |
| GPR172A  | 110.01 | 92.75  | 97.24  | 150.82 | 140.09 | 134.87 | 0.00 | 1.4 |
| PAFAH1B2 | 97.27  | 92.88  | 109.85 | 131.99 | 140.01 | 151.57 | 0.01 | 1.4 |

|                             |        |        |        |        |        |        |      |     |
|-----------------------------|--------|--------|--------|--------|--------|--------|------|-----|
| NLK                         | 114.80 | 83.74  | 101.46 | 146.56 | 140.69 | 133.29 | 0.01 | 1.4 |
| MAP3K7                      | 111.10 | 103.76 | 85.14  | 139.29 | 139.75 | 138.50 | 0.01 | 1.4 |
| CS                          | 119.50 | 92.02  | 88.48  | 157.98 | 128.22 | 130.72 | 0.05 | 1.4 |
| P2RY2                       | 90.52  | 92.84  | 116.64 | 137.82 | 134.08 | 145.78 | 0.01 | 1.4 |
| KIAA1524                    | 106.11 | 94.53  | 99.36  | 146.37 | 145.96 | 124.19 | 0.01 | 1.4 |
| AK3                         | 88.50  | 112.84 | 98.65  | 133.79 | 134.47 | 146.39 | 0.01 | 1.4 |
| BRD2                        | 92.84  | 105.03 | 102.13 | 138.39 | 148.03 | 127.62 | 0.01 | 1.4 |
| ABL1                        | 100.00 | 104.92 | 95.08  | 116.72 | 158.40 | 134.39 | 0.04 | 1.4 |
| SH3BP5                      | 85.21  | 107.66 | 107.13 | 137.75 | 138.42 | 132.58 | 0.01 | 1.4 |
| BRD7                        | 88.56  | 108.28 | 103.16 | 116.82 | 138.78 | 148.61 | 0.04 | 1.4 |
| C17orf75                    | 102.12 | 94.30  | 103.58 | 120.93 | 145.56 | 131.93 | 0.01 | 1.3 |
| PI4K2B                      | 81.40  | 114.94 | 103.65 | 137.73 | 127.26 | 131.01 | 0.04 | 1.3 |
| MDH2                        | 106.64 | 99.58  | 93.78  | 132.61 | 136.44 | 125.99 | 0.00 | 1.3 |
| SMARCB1                     | 89.38  | 105.81 | 104.81 | 115.12 | 141.11 | 135.71 | 0.03 | 1.3 |
| BRD9                        | 109.05 | 100.42 | 90.53  | 144.25 | 128.72 | 120.62 | 0.02 | 1.3 |
| MAPK14                      | 89.74  | 110.37 | 99.89  | 133.47 | 127.90 | 127.64 | 0.01 | 1.3 |
| VHL                         | 111.08 | 98.47  | 90.45  | 136.91 | 135.91 | 112.84 | 0.04 | 1.3 |
| CSNK2B                      | 87.32  | 101.10 | 111.58 | 120.88 | 135.08 | 131.34 | 0.02 | 1.3 |
| MAPK9                       | 93.30  | 103.48 | 103.23 | 116.71 | 134.68 | 136.63 | 0.02 | 1.3 |
| FH                          | 88.01  | 103.30 | 108.69 | 116.95 | 122.93 | 134.12 | 0.04 | 1.3 |
| RIPK2                       | 107.86 | 93.78  | 98.36  | 128.03 | 118.96 | 127.05 | 0.01 | 1.3 |
| RB1                         | 100.30 | 99.01  | 100.69 | 127.90 | 127.04 | 119.56 | 0.00 | 1.2 |
| MAPK6                       | 89.31  | 101.11 | 109.58 | 112.56 | 134.50 | 123.49 | 0.05 | 1.2 |
| MAP2K4                      | 106.21 | 87.45  | 106.34 | 113.59 | 124.80 | 128.78 | 0.04 | 1.2 |
| TGFBR1                      | 106.30 | 96.83  | 96.87  | 123.82 | 125.83 | 116.76 | 0.01 | 1.2 |
| MET                         | 100.36 | 97.04  | 102.60 | 117.81 | 120.36 | 123.81 | 0.00 | 1.2 |
| ACO1                        | 91.31  | 106.02 | 102.67 | 116.76 | 121.04 | 122.48 | 0.01 | 1.2 |
| GPI                         | 98.78  | 108.12 | 93.10  | 125.55 | 118.94 | 111.49 | 0.04 | 1.2 |
| RAF1                        | 100.61 | 102.72 | 96.68  | 114.38 | 109.57 | 131.47 | 0.05 | 1.2 |
| CDK4                        | 101.71 | 103.23 | 95.06  | 113.55 | 113.40 | 125.26 | 0.02 | 1.2 |
| CDK1                        | 94.53  | 104.79 | 100.68 | 113.34 | 112.18 | 125.61 | 0.03 | 1.2 |
| PTEN                        | 104.69 | 102.38 | 92.93  | 118.46 | 113.63 | 114.01 | 0.02 | 1.2 |
| <b>Down-Regulated Genes</b> |        |        |        |        |        |        |      |     |
| CANT1                       | 102.26 | 102.13 | 95.61  | 74.26  | 77.76  | 72.82  | 0.00 | 0.7 |
| RPS6KA4                     | 89.61  | 112.76 | 97.63  | 67.81  | 80.92  | 74.18  | 0.03 | 0.7 |
| ATIC                        | 92.36  | 103.75 | 103.90 | 69.51  | 72.44  | 77.62  | 0.00 | 0.7 |
| RPS6KC1                     | 97.65  | 110.53 | 91.82  | 63.45  | 84.16  | 71.48  | 0.03 | 0.7 |
| PRKAR1A                     | 99.04  | 100.29 | 100.67 | 68.68  | 72.59  | 76.65  | 0.00 | 0.7 |
| RIPK1                       | 100.25 | 95.01  | 104.74 | 63.70  | 69.64  | 83.27  | 0.01 | 0.7 |
| BRCA2                       | 94.16  | 106.10 | 99.74  | 68.15  | 71.34  | 77.11  | 0.00 | 0.7 |
| PDXK                        | 95.39  | 105.72 | 98.89  | 73.37  | 69.33  | 73.59  | 0.00 | 0.7 |
| LATS2                       | 109.68 | 106.83 | 83.49  | 76.02  | 66.31  | 71.03  | 0.03 | 0.7 |
| AURKA                       | 94.64  | 113.24 | 92.13  | 71.74  | 65.29  | 75.09  | 0.02 | 0.7 |
| SPTAN1                      | 94.90  | 102.35 | 102.74 | 68.42  | 69.69  | 72.68  | 0.00 | 0.7 |
| CAMK2D                      | 85.56  | 115.08 | 99.36  | 69.50  | 65.52  | 74.53  | 0.03 | 0.7 |
| BMPR1A                      | 109.26 | 103.28 | 87.46  | 65.26  | 71.55  | 69.21  | 0.01 | 0.7 |
| TKT                         | 94.42  | 106.27 | 99.31  | 65.99  | 67.99  | 70.86  | 0.00 | 0.7 |
| SGK196                      | 86.59  | 112.34 | 101.08 | 72.34  | 66.83  | 65.30  | 0.01 | 0.7 |
| LIMK2                       | 101.43 | 93.63  | 104.94 | 69.47  | 68.76  | 64.83  | 0.00 | 0.7 |
| FBXW7                       | 106.32 | 104.96 | 88.72  | 72.23  | 65.27  | 65.31  | 0.01 | 0.7 |

|         |        |        |        |       |       |       |      |     |
|---------|--------|--------|--------|-------|-------|-------|------|-----|
| SRPK2   | 94.96  | 101.78 | 103.26 | 71.26 | 63.48 | 65.17 | 0.00 | 0.7 |
| SMAD4   | 106.16 | 95.81  | 98.03  | 58.31 | 63.28 | 74.85 | 0.00 | 0.7 |
| PIP5K1A | 97.04  | 106.67 | 96.29  | 65.90 | 68.32 | 62.03 | 0.00 | 0.7 |
| CARS    | 109.98 | 104.43 | 85.59  | 63.52 | 60.63 | 65.80 | 0.01 | 0.6 |
| BRD1    | 120.83 | 90.76  | 88.41  | 65.75 | 63.12 | 60.99 | 0.03 | 0.6 |
| PDK1    | 103.94 | 109.44 | 86.61  | 73.79 | 60.17 | 53.65 | 0.01 | 0.6 |
| H6PD    | 124.34 | 78.77  | 96.89  | 54.75 | 70.57 | 60.73 | 0.05 | 0.6 |
| RUNX1   | 110.51 | 88.95  | 100.54 | 60.45 | 62.33 | 62.23 | 0.00 | 0.6 |
| PIKFYVE | 105.65 | 89.69  | 104.66 | 65.22 | 53.00 | 66.37 | 0.00 | 0.6 |
| PRKD2   | 114.02 | 96.97  | 89.01  | 59.53 | 57.54 | 66.06 | 0.01 | 0.6 |
| NF2     | 104.52 | 97.14  | 98.34  | 60.72 | 64.47 | 57.76 | 0.00 | 0.6 |
| JUN     | 110.79 | 105.36 | 83.84  | 60.50 | 58.71 | 62.61 | 0.01 | 0.6 |
| BMPR2   | 102.34 | 97.17  | 100.49 | 61.37 | 54.70 | 63.72 | 0.00 | 0.6 |
| CCND1   | 107.49 | 97.78  | 94.73  | 58.79 | 58.02 | 61.48 | 0.00 | 0.6 |
| CDH1    | 93.28  | 106.31 | 100.41 | 58.32 | 61.00 | 58.15 | 0.00 | 0.6 |
| TRIB1   | 114.51 | 88.92  | 96.56  | 58.70 | 54.87 | 63.68 | 0.01 | 0.6 |
| ABL2    | 110.03 | 101.83 | 88.14  | 54.74 | 62.36 | 58.45 | 0.00 | 0.6 |
| NPM1    | 96.75  | 104.96 | 98.29  | 54.00 | 54.00 | 56.62 | 0.00 | 0.5 |
| ETNK2   | 95.16  | 87.67  | 117.17 | 44.66 | 52.02 | 66.98 | 0.01 | 0.5 |
| JAK1    | 70.16  | 104.17 | 125.66 | 55.93 | 54.15 | 51.56 | 0.05 | 0.5 |
| PLXNB2  | 107.81 | 99.81  | 92.38  | 53.14 | 49.49 | 57.30 | 0.00 | 0.5 |
| NEK7    | 106.05 | 94.44  | 99.51  | 50.83 | 55.51 | 53.60 | 0.00 | 0.5 |
| HERC4   | 101.72 | 105.21 | 93.07  | 53.40 | 50.35 | 53.23 | 0.00 | 0.5 |
| RIOK3   | 114.66 | 102.70 | 82.64  | 52.09 | 41.01 | 62.60 | 0.01 | 0.5 |
| ATF2    | 93.99  | 107.22 | 98.78  | 38.01 | 56.30 | 58.19 | 0.00 | 0.5 |
| APC     | 93.07  | 133.46 | 73.47  | 54.11 | 50.09 | 48.61 | 0.05 | 0.5 |
| PIK3R1  | 71.49  | 110.08 | 118.43 | 55.74 | 41.38 | 52.83 | 0.03 | 0.5 |
| TNIK    | 92.42  | 118.61 | 88.97  | 48.05 | 40.12 | 59.52 | 0.01 | 0.5 |
| CXCR7   | 96.52  | 94.33  | 109.15 | 52.16 | 52.47 | 38.81 | 0.00 | 0.5 |
| GNAS    | 99.34  | 98.90  | 101.76 | 48.50 | 47.80 | 48.36 | 0.00 | 0.5 |
| PKN1    | 104.60 | 88.72  | 106.68 | 45.31 | 46.34 | 47.45 | 0.00 | 0.5 |
| LPAR1   | 93.72  | 116.63 | 89.65  | 36.29 | 49.87 | 48.58 | 0.00 | 0.4 |
| PIK3C2B | 101.12 | 103.81 | 95.08  | 56.94 | 39.02 | 38.43 | 0.00 | 0.4 |
| IRAK2   | 85.32  | 108.56 | 106.12 | 42.10 | 56.71 | 35.03 | 0.00 | 0.4 |
| TGFBR2  | 87.37  | 113.03 | 99.60  | 37.35 | 40.70 | 43.57 | 0.00 | 0.4 |
| CALM3   | 88.83  | 102.81 | 108.35 | 36.49 | 43.15 | 36.87 | 0.00 | 0.4 |
| HRAS    | 69.46  | 116.39 | 114.15 | 38.16 | 35.63 | 41.85 | 0.02 | 0.4 |
| IDH1    | 106.85 | 109.69 | 83.46  | 37.03 | 29.78 | 47.63 | 0.00 | 0.4 |
| MAGI2   | 133.29 | 92.11  | 74.60  | 43.31 | 45.01 | 21.11 | 0.03 | 0.4 |
| FLT3    | 122.76 | 113.11 | 64.13  | 26.59 | 47.37 | 34.56 | 0.03 | 0.4 |
| PRKCQ   | 101.45 | 100.14 | 98.41  | 32.96 | 35.88 | 39.27 | 0.00 | 0.4 |
| ILK     | 96.77  | 106.34 | 96.88  | 29.07 | 34.35 | 42.80 | 0.00 | 0.4 |
| INPP4B  | 92.55  | 107.86 | 99.59  | 36.86 | 29.67 | 37.83 | 0.00 | 0.3 |
| PLK2    | 97.54  | 92.11  | 110.35 | 30.90 | 32.64 | 37.50 | 0.00 | 0.3 |
| AURKC   | 122.94 | 116.51 | 60.55  | 21.30 | 37.95 | 41.54 | 0.03 | 0.3 |
| FLNB    | 105.10 | 95.84  | 99.05  | 32.87 | 31.05 | 28.04 | 0.00 | 0.3 |
| EPHB6   | 121.89 | 96.25  | 81.86  | 26.40 | 39.20 | 25.74 | 0.01 | 0.3 |
| NTRK1   | 119.13 | 109.76 | 71.12  | 25.80 | 22.99 | 41.93 | 0.01 | 0.3 |
| TGFBR3  | 149.12 | 84.11  | 66.77  | 36.91 | 32.88 | 17.99 | 0.05 | 0.3 |
| TRIM5   | 119.21 | 101.99 | 78.80  | 22.75 | 26.84 | 35.36 | 0.00 | 0.3 |

|         |        |        |        |       |       |       |      |     |
|---------|--------|--------|--------|-------|-------|-------|------|-----|
| HKDC1   | 98.24  | 135.77 | 65.98  | 26.60 | 33.17 | 20.75 | 0.02 | 0.3 |
| TBX22   | 130.75 | 120.46 | 48.79  | 28.32 | 33.64 | 18.41 | 0.05 | 0.3 |
| HOXB7   | 118.67 | 96.82  | 84.51  | 24.45 | 31.31 | 19.46 | 0.00 | 0.3 |
| MST1R   | 104.36 | 103.37 | 92.27  | 22.22 | 24.91 | 26.15 | 0.00 | 0.2 |
| MYLK4   | 69.48  | 137.18 | 93.33  | 30.10 | 26.81 | 14.67 | 0.02 | 0.2 |
| MRGPRX3 | 118.30 | 93.42  | 88.28  | 25.62 | 22.83 | 16.65 | 0.00 | 0.2 |
| ALK     | 104.07 | 102.73 | 93.20  | 22.54 | 20.08 | 21.98 | 0.00 | 0.2 |
| INSR    | 99.84  | 92.06  | 108.09 | 13.64 | 17.95 | 29.07 | 0.00 | 0.2 |
| LRP1B   | 119.97 | 126.32 | 53.71  | 0.00  | 15.43 | 33.78 | 0.03 | 0.2 |
| EPHA4   | 128.80 | 106.80 | 64.40  | 20.46 | 14.91 | 12.69 | 0.01 | 0.2 |
| ERBB4   | 98.24  | 135.77 | 65.98  | 10.64 | 18.96 | 10.37 | 0.01 | 0.1 |
| ROBO1   | 103.32 | 95.99  | 100.69 | 14.48 | 12.90 | 11.55 | 0.00 | 0.1 |
| STK32A  | 84.10  | 121.76 | 94.14  | 10.12 | 16.23 | 7.89  | 0.00 | 0.1 |
| MAP2K6  | 98.31  | 109.99 | 91.70  | 10.65 | 15.81 | 6.92  | 0.00 | 0.1 |
| RPS6KA6 | 143.73 | 83.17  | 73.10  | 14.01 | 10.05 | 7.98  | 0.02 | 0.1 |
| ANGPTL4 | 120.81 | 95.40  | 83.79  | 9.35  | 12.90 | 7.06  | 0.00 | 0.1 |
| FYN     | 82.16  | 118.31 | 99.54  | 8.37  | 8.39  | 9.18  | 0.00 | 0.1 |
| PRKD1   | 74.75  | 114.38 | 110.87 | 6.07  | 9.01  | 9.87  | 0.00 | 0.1 |
| SMO     | 120.56 | 92.82  | 86.62  | 0.00  | 15.95 | 0.00  | 0.00 | 0.1 |
| AKT3    | 88.61  | 105.97 | 105.42 | 3.84  | 4.88  | 5.35  | 0.00 | 0.0 |
| TP53    | 110.82 | 99.07  | 90.11  | 4.99  | 3.59  | 2.62  | 0.00 | 0.0 |
| CDK14   | 118.73 | 90.53  | 90.74  | 3.55  | 5.53  | 1.73  | 0.00 | 0.0 |
| ROS1    | 92.87  | 100.01 | 107.11 | 2.13  | 1.90  | 3.86  | 0.00 | 0.0 |
| HCK     | 100.78 | 126.35 | 72.87  | 0.00  | 0.00  | 0.00  | 0.00 | 0.0 |

### T3

#### Upregulated Genes

| Term                                                      | Count | %           | PValue   |
|-----------------------------------------------------------|-------|-------------|----------|
| GO:0006468~protein amino acid phosphorylation             | 52    | 41.2698413  | 4.83E-37 |
| GO:0016310~phosphorylation                                | 55    | 43.6507937  | 1.13E-36 |
| GO:0006793~phosphorus metabolic process                   | 57    | 45.2380952  | 1.61E-34 |
| GO:0006796~phosphate metabolic process                    | 57    | 45.2380952  | 1.61E-34 |
| GO:0007242~intracellular signaling cascade                | 38    | 30.1587302  | 2.28E-12 |
| GO:0043549~regulation of kinase activity                  | 19    | 15.0793651  | 7.45E-10 |
| GO:0042325~regulation of phosphorylation                  | 21    | 16.6666667  | 1.28E-09 |
| GO:0051338~regulation of transferase activity             | 19    | 15.0793651  | 1.44E-09 |
| GO:0019220~regulation of phosphate metabolic process      | 21    | 16.6666667  | 2.55E-09 |
| GO:0051174~regulation of phosphorus metabolic process     | 21    | 16.6666667  | 2.55E-09 |
| GO:0045859~regulation of protein kinase activity          | 18    | 14.2857143  | 3.28E-09 |
| GO:0006084~acetyl-CoA metabolic process                   | 8     | 6.34920635  | 4.92E-09 |
| GO:0007243~protein kinase cascade                         | 18    | 14.2857143  | 9.35E-09 |
| GO:0009060~aerobic respiration                            | 8     | 6.34920635  | 1.23E-08 |
| GO:0046356~acetyl-CoA catabolic process                   | 7     | 5.55555556  | 2.53E-08 |
| GO:0006099~tricarboxylic acid cycle                       | 7     | 5.55555556  | 2.53E-08 |
| GO:0006732~coenzyme metabolic process                     | 12    | 9.52380952  | 5.32E-08 |
| GO:0009109~coenzyme catabolic process                     | 7     | 5.55555556  | 5.66E-08 |
| GO:0051187~cofactor catabolic process                     | 7     | 5.55555556  | 1.75E-07 |
| GO:0042127~regulation of cell proliferation               | 23    | 18.2539683  | 4.02E-07 |
| GO:0046777~protein amino acid autophosphorylation         | 9     | 7.14285714  | 4.86E-07 |
| GO:0042981~regulation of apoptosis                        | 23    | 18.2539683  | 5.78E-07 |
| GO:0051186~cofactor metabolic process                     | 12    | 9.52380952  | 6.22E-07 |
| GO:0043067~regulation of programmed cell death            | 23    | 18.2539683  | 6.83E-07 |
| GO:0010941~regulation of cell death                       | 23    | 18.2539683  | 7.27E-07 |
| GO:0000075~cell cycle checkpoint                          | 9     | 7.14285714  | 8.24E-07 |
| GO:0044093~positive regulation of molecular function      | 19    | 15.0793651  | 1.41E-06 |
| GO:0043085~positive regulation of catalytic activity      | 17    | 13.4920635  | 5.66E-06 |
| GO:0043066~negative regulation of apoptosis               | 14    | 11.11111111 | 7.11E-06 |
| GO:0043648~dicarboxylic acid metabolic process            | 6     | 4.76190476  | 8.17E-06 |
| GO:0043069~negative regulation of programmed cell death   | 14    | 11.11111111 | 8.27E-06 |
| GO:0060548~negative regulation of cell death              | 14    | 11.11111111 | 8.52E-06 |
| GO:0006091~generation of precursor metabolites and energy | 13    | 10.3174603  | 1.06E-05 |
| GO:0018107~peptidyl-threonine phosphorylation             | 5     | 3.96825397  | 1.25E-05 |
| GO:0006917~induction of apoptosis                         | 13    | 10.3174603  | 1.33E-05 |
| GO:0012502~induction of programmed cell death             | 13    | 10.3174603  | 1.37E-05 |
| GO:0045333~cellular respiration                           | 8     | 6.34920635  | 1.54E-05 |

|                                                             |    |            |          |
|-------------------------------------------------------------|----|------------|----------|
| GO:0051726~regulation of cell cycle                         | 13 | 10.3174603 | 1.86E-05 |
| GO:0018210~peptidyl-threonine modification                  | 5  | 3.96825397 | 2.39E-05 |
| GO:0010033~response to organic substance                    | 19 | 15.0793651 | 2.46E-05 |
| GO:0019318~hexose metabolic process                         | 10 | 7.93650794 | 3.02E-05 |
| GO:0006915~apoptosis                                        | 17 | 13.4920635 | 3.47E-05 |
| GO:0006006~glucose metabolic process                        | 9  | 7.14285714 | 3.92E-05 |
| GO:0012501~programmed cell death                            | 17 | 13.4920635 | 4.14E-05 |
| GO:0042770~DNA damage response, signal transduction         | 7  | 5.55555556 | 5.14E-05 |
| GO:0043065~positive regulation of apoptosis                 | 14 | 11.1111111 | 5.49E-05 |
| GO:0043068~positive regulation of programmed cell death     | 14 | 11.1111111 | 5.90E-05 |
| GO:0010942~positive regulation of cell death                | 14 | 11.1111111 | 6.18E-05 |
| GO:0008219~cell death                                       | 18 | 14.2857143 | 8.34E-05 |
| GO:0016265~death                                            | 18 | 14.2857143 | 9.08E-05 |
| GO:0005996~monosaccharide metabolic process                 | 10 | 7.93650794 | 9.33E-05 |
| GO:0006007~glucose catabolic process                        | 6  | 4.76190476 | 1.15E-04 |
| GO:0007167~enzyme linked receptor protein signaling pathway | 12 | 9.52380952 | 1.24E-04 |
| GO:0033674~positive regulation of kinase activity           | 10 | 7.93650794 | 1.26E-04 |
| GO:0000165~MAPKKK cascade                                   | 9  | 7.14285714 | 1.43E-04 |
|                                                             |    |            |          |

### Down-regulated Genes

| Term                                                        | Count | %          | PValue   |
|-------------------------------------------------------------|-------|------------|----------|
| GO:0016310~phosphorylation                                  | 50    | 54.9450549 | 5.39E-37 |
| GO:0006468~protein amino acid phosphorylation               | 47    | 51.6483516 | 1.07E-36 |
| GO:0006793~phosphorus metabolic process                     | 50    | 54.9450549 | 5.99E-33 |
| GO:0006796~phosphate metabolic process                      | 50    | 54.9450549 | 5.99E-33 |
| GO:0007242~intracellular signaling cascade                  | 31    | 34.0659341 | 1.56E-10 |
| GO:0007167~enzyme linked receptor protein signaling pathway | 17    | 18.6813187 | 6.50E-10 |
| GO:0042325~regulation of phosphorylation                    | 19    | 20.8791209 | 1.07E-09 |
| GO:0051174~regulation of phosphorus metabolic process       | 19    | 20.8791209 | 2.01E-09 |
| GO:0019220~regulation of phosphate metabolic process        | 19    | 20.8791209 | 2.01E-09 |
| GO:0007243~protein kinase cascade                           | 17    | 18.6813187 | 2.03E-09 |
| GO:0042127~regulation of cell proliferation                 | 22    | 24.1758242 | 2.66E-08 |
| GO:0051094~positive regulation of developmental process     | 14    | 15.3846154 | 3.07E-08 |
| GO:0044093~positive regulation of molecular function        | 18    | 19.7802198 | 2.19E-07 |
| GO:0045597~positive regulation of cell differentiation      | 12    | 13.1868132 | 2.95E-07 |
| GO:0045859~regulation of protein kinase activity            | 14    | 15.3846154 | 3.77E-07 |
| GO:0043549~regulation of kinase activity                    | 14    | 15.3846154 | 5.57E-07 |
| GO:0010033~response to organic substance                    | 19    | 20.8791209 | 8.33E-07 |
| GO:0051338~regulation of transferase activity               | 14    | 15.3846154 | 8.86E-07 |
| GO:0001932~regulation of protein amino acid phosphorylation | 10    | 10.989011  | 1.96E-06 |

|                                                              |    |            |          |
|--------------------------------------------------------------|----|------------|----------|
| GO:0007169~transmembrane receptor protein tyrosine kinas     | 11 | 12.0879121 | 2.06E-06 |
| GO:0051130~positive regulation of cellular component organ   | 10 | 10.989011  | 2.85E-06 |
| GO:0008284~positive regulation of cell proliferation         | 14 | 15.3846154 | 2.91E-06 |
| GO:0009725~response to hormone stimulus                      | 13 | 14.2857143 | 4.81E-06 |
| GO:0051098~regulation of binding                             | 9  | 9.89010989 | 7.25E-06 |
| GO:0007166~cell surface receptor linked signal transduction  | 29 | 31.8681319 | 1.27E-05 |
| GO:0009719~response to endogenous stimulus                   | 13 | 14.2857143 | 1.30E-05 |
| GO:0051101~regulation of DNA binding                         | 8  | 8.79120879 | 1.45E-05 |
| GO:0045860~positive regulation of protein kinase activity    | 10 | 10.989011  | 1.55E-05 |
| GO:0033674~positive regulation of kinase activity            | 10 | 10.989011  | 2.05E-05 |
| GO:0008285~negative regulation of cell proliferation         | 12 | 13.1868132 | 2.38E-05 |
| GO:0030097~hemopoiesis                                       | 10 | 10.989011  | 2.43E-05 |
| GO:0051347~positive regulation of transferase activity       | 10 | 10.989011  | 2.77E-05 |
| GO:0043085~positive regulation of catalytic activity         | 14 | 15.3846154 | 3.33E-05 |
| GO:0032388~positive regulation of intracellular transport    | 5  | 5.49450549 | 4.21E-05 |
| GO:0048534~hemopoietic or lymphoid organ development         | 10 | 10.989011  | 5.18E-05 |
| GO:0006275~regulation of DNA replication                     | 6  | 6.59340659 | 5.30E-05 |
| GO:0007569~cell aging                                        | 5  | 5.49450549 | 6.19E-05 |
| GO:0044092~negative regulation of molecular function         | 11 | 12.0879121 | 6.64E-05 |
| GO:0043408~regulation of MAPKKK cascade                      | 7  | 7.69230769 | 8.05E-05 |
| GO:0002520~immune system development                         | 10 | 10.989011  | 8.21E-05 |
| GO:0007568~aging                                             | 7  | 7.69230769 | 8.47E-05 |
| GO:0042493~response to drug                                  | 9  | 9.89010989 | 8.64E-05 |
| GO:0007369~gastrulation                                      | 6  | 6.59340659 | 9.51E-05 |
| GO:0043388~positive regulation of DNA binding                | 6  | 6.59340659 | 9.51E-05 |
| GO:0032386~regulation of intracellular transport             | 6  | 6.59340659 | 1.02E-04 |
| GO:0051050~positive regulation of transport                  | 9  | 9.89010989 | 1.08E-04 |
| GO:0030334~regulation of cell migration                      | 8  | 8.79120879 | 1.22E-04 |
| GO:0031399~regulation of protein modification process        | 10 | 10.989011  | 1.36E-04 |
| GO:0051259~protein oligomerization                           | 8  | 8.79120879 | 1.47E-04 |
| GO:0051092~positive regulation of NF-kappaB transcription f  | 5  | 5.49450549 | 1.47E-04 |
| GO:0051099~positive regulation of binding                    | 6  | 6.59340659 | 1.59E-04 |
| GO:0042306~regulation of protein import into nucleus         | 5  | 5.49450549 | 1.94E-04 |
| GO:0010627~regulation of protein kinase cascade              | 9  | 9.89010989 | 2.30E-04 |
| GO:0018108~peptidyl-tyrosine phosphorylation                 | 5  | 5.49450549 | 2.31E-04 |
| GO:0031346~positive regulation of cell projection organizati | 5  | 5.49450549 | 2.52E-04 |
| GO:0040012~regulation of locomotion                          | 8  | 8.79120879 | 2.68E-04 |
| GO:0018212~peptidyl-tyrosine modification                    | 5  | 5.49450549 | 2.73E-04 |
| GO:0051270~regulation of cell motion                         | 8  | 8.79120879 | 2.77E-04 |
| GO:0032880~regulation of protein localization                | 7  | 7.69230769 | 2.93E-04 |



**T4**  
**Up-regulated Genes**

| Term                                                       | Count | %    | P-Value   | Benjamini | GENES                                                                                                                                    |
|------------------------------------------------------------|-------|------|-----------|-----------|------------------------------------------------------------------------------------------------------------------------------------------|
| Citrate cycle (TCA cycle)                                  | 9     | 7.1  | 2.1E-08   | 0.000002  | SDHA, SDHB, ACO1, SDHD, CS, ACLY, DLAT, MDH2, FH                                                                                         |
| Pathways in cancer                                         | 22    | 17.5 | 3.3E-08   | 0.0000016 | CEBPA, FGFR2, VHL, TGFBR1, MET, RAF1, RB1, CDK4, BIRC3, PTEN, SUFU, NRAS, CDKN2A, KRAS, VEGFA, MAPK9, PIK3CA, MAPK8, MTOR, ABL1, MYC, FH |
| ErbB signaling pathway                                     | 12    | 9.5  | 1.1E-07   | 0.0000036 | NRAS, KRAS, PAK2, MAP2K4, RAF1, MAPK9, PIK3CA, MAPK8, RPS6KB1, MTOR, ABL1, MYC                                                           |
| Chronic myeloid leukemia                                   | 11    | 8.7  | 2.7E-07   | 0.0000064 | NRAS, CDKN2A, KRAS, TGFBR1, RAF1, PIK3CA, RB1, ABL1, CDK4, MYC, PTPN11                                                                   |
| Renal cell carcinoma                                       | 10    | 7.9  | 0.0000015 | 0.000029  | NRAS, KRAS, PAK2, VHL, MET, VEGFA, RAF1, PIK3CA, FH, PTPN11                                                                              |
| Pancreatic cancer                                          | 10    | 7.9  | 0.000002  | 0.000031  | CDKN2A, KRAS, TGFBR1, VEGFA, RAF1, MAPK9, PIK3CA, MAPK8, RB1, CDK4                                                                       |
| Bladder cancer                                             | 8     | 6.3  | 0.0000041 | 0.000055  | NRAS, CDKN2A, KRAS, VEGFA, RAF1, RB1, CDK4, MYC                                                                                          |
| Neurotrophin signaling pathway                             | 12    | 9.5  | 0.0000042 | 0.00005   | NRAS, MAP3K5, KRAS, MAPK14, RAF1, MAPK9, RIPK2, PIK3CA, MAPK8, ABL1, CSK, PTPN11                                                         |
| Glioma                                                     | 9     | 7.1  | 0.0000067 | 0.000071  | NRAS, CDKN2A, KRAS, RAF1, PIK3CA, RB1, MTOR, CDK4, PTEN                                                                                  |
| Insulin signaling pathway                                  | 12    | 9.5  | 0.0000097 | 0.000092  | NRAS, PRKAR2A, KRAS, TSC1, PRKCI, HK1, RAF1, MAPK9, PIK3CA, MAPK8, RPS6KB1, MTOR                                                         |
| Melanoma                                                   | 9     | 7.1  | 0.000017  | 0.00014   | NRAS, CDKN2A, KRAS, MET, RAF1, PIK3CA, RB1, CDK4, PTEN                                                                                   |
| Acute myeloid leukemia                                     | 8     | 6.3  | 0.000037  | 0.00029   | CEBPA, NRAS, KRAS, RAF1, PIK3CA, RPS6KB1, MTOR, MYC                                                                                      |
| MAPK signaling pathway                                     | 15    | 11.9 | 0.000087  | 0.00063   | FGFR2, MAPKAPK5, TGFBR1, NLK, MAP2K4, RAF1, MAP3K7, NRAS, MAP3K5, KRAS, PAK2, MAPK14, MAPK9, MAPK8, MYC                                  |
| Non-small cell lung cancer                                 | 7     | 5.6  | 0.00022   | 0.0015    | NRAS, CDKN2A, KRAS, RAF1, PIK3CA, RB1, CDK4                                                                                              |
| Fc epsilon RI signaling pathway                            | 8     | 6.3  | 0.00025   | 0.0016    | NRAS, KRAS, MAPK14, MAP2K4, RAF1, MAPK9, PIK3CA, MAPK8                                                                                   |
| T cell receptor signaling pathway                          | 9     | 7.1  | 0.00034   | 0.002     | MAP3K7, NRAS, KRAS, PAK2, MAPK14, RAF1, MAPK9, PIK3CA, CDK4                                                                              |
| Colorectal cancer                                          | 8     | 6.3  | 0.00039   | 0.0022    | KRAS, TGFBR1, MET, RAF1, MAPK9, PIK3CA, MAPK8, MYC                                                                                       |
| Prostate cancer                                            | 8     | 6.3  | 0.00056   | 0.003     | FGFR2, NRAS, KRAS, RAF1, PIK3CA, RB1, MTOR, PTEN                                                                                         |
| epithelial cell signaling in Helicobacter pylori infection | 7     | 5.6  | 0.00077   | 0.0038    | MAPK14, MET, MAP2K4, MAPK9, MAPK8, CSK, PTPN11                                                                                           |
| Cell cycle                                                 | 9     | 7.1  | 0.0009    | 0.0043    | CDK1, CDKN2A, BUB1B, TTK, CHEK1, RB1, ABL1, CDK4, MYC                                                                                    |
| GnRH signaling pathway                                     | 8     | 6.3  | 0.001     | 0.0045    | NRAS, KRAS, GNAQ, MAPK14, MAP2K4, RAF1, MAPK9, MAPK8                                                                                     |
| mTOR signaling pathway                                     | 6     | 4.8  | 0.0015    | 0.0063    | TSC1, VEGFA, STRADA, PIK3CA, RPS6KB1, MTOR                                                                                               |
| Endometrial cancer                                         | 6     | 4.8  | 0.0015    | 0.0063    | NRAS, KRAS, RAF1, PIK3CA, MYC, PTEN                                                                                                      |
| Progesterone-mediated oocyte maturation                    | 7     | 5.6  | 0.0026    | 0.011     | CDK1, KRAS, MAPK14, RAF1, MAPK9, PIK3CA, MAPK8                                                                                           |
| Gap junction                                               | 7     | 5.6  | 0.0031    | 0.012     | CDK1, NRAS, TUBB, KRAS, GNAQ, CSNK1D, RAF1                                                                                               |
| NOD-like receptor signaling pathway                        | 6     | 4.8  | 0.0032    | 0.012     | MAP3K7, MAPK14, MAPK9, RIPK2, MAPK8, BIRC3                                                                                               |

**Down-regulated Genes**

| Term                                  | Count | %         | P-Value   | Benjamini   | GENES                                                                                                |
|---------------------------------------|-------|-----------|-----------|-------------|------------------------------------------------------------------------------------------------------|
| Neurotrophin signaling pathway        | 12    | 13.186813 | 1.45E-07  | 1.23E-05    | PDK1, IRAK2, RPS6KA6, HRAS, RPS6KA4, JUN, NTRK1, CAMK2D, TP53, CALM3, AKT3, PIK3R1                   |
| Endometrial cancer                    | 8     | 8.7912088 | 1.97E-06  | 8.36E-05    | HRAS, CCND1, ILK, TP53, CDH1, AKT3, PIK3R1, APC                                                      |
| Pathways in cancer                    | 16    | 17.582418 | 3.75E-06  | 1.06E-04    | HRAS, FLT3, TGFBR2, TP53, SMAD4, BRCA2, CDH1, SMO, CCND1, JUN, NTRK1, JAK1, RUNX1, PIK3R1, AKT3, APC |
| Pancreatic cancer                     | 8     | 8.7912088 | 1.80E-05  | 3.83E-04    | CCND1, TGFBR2, SMAD4, TP53, JAK1, BRCA2, AKT3, PIK3R1                                                |
| Chronic myeloid leukemia              | 8     | 8.7912088 | 2.36E-05  | 4.02E-04    | HRAS, CCND1, TGFBR2, SMAD4, TP53, RUNX1, AKT3, PIK3R1                                                |
| Colorectal cancer                     | 8     | 8.7912088 | 4.97E-05  | 7.03E-04    | CCND1, JUN, TGFBR2, SMAD4, TP53, AKT3, PIK3R1, APC                                                   |
| Glioma                                | 7     | 7.6923077 | 8.44E-05  | 0.001023812 | HRAS, CCND1, CAMK2D, TP53, CALM3, AKT3, PIK3R1                                                       |
| Thyroid cancer                        | 5     | 5.4945055 | 3.34E-04  | 0.003540472 | HRAS, CCND1, NTRK1, TP53, CDH1                                                                       |
| Apoptosis                             | 7     | 7.6923077 | 5.04E-04  | 0.004745506 | IRAK2, RIPK1, NTRK1, PRKAR1A, TP53, AKT3, PIK3R1                                                     |
| ErbB signaling pathway                | 7     | 7.6923077 | 5.04E-04  | 0.004745506 | HRAS, ERBB4, JUN, CAMK2D, ABL2, AKT3, PIK3R1                                                         |
| Acute myeloid leukemia                | 6     | 6.5934066 | 5.48E-04  | 0.004649785 | HRAS, CCND1, FLT3, RUNX1, AKT3, PIK3R1                                                               |
| MAPK signaling pathway                | 11    | 12.087912 | 9.84E-04  | 0.00757819  | RPS6KA6, HRAS, RPS6KA4, JUN, NTRK1, TGFBR2, TP53, FLNB, AKT3, MAP2K6, ATF2                           |
| Melanoma                              | 6     | 6.5934066 | 0.0013855 | 0.009772924 | HRAS, CCND1, TP53, CDH1, AKT3, PIK3R1                                                                |
| T cell receptor signaling pathway     | 7     | 7.6923077 | 0.0015755 | 0.010256427 | PDK1, PRKCQ, HRAS, FYN, JUN, AKT3, PIK3R1                                                            |
| Phosphatidylinositol signaling system | 6     | 6.5934066 | 0.0016686 | 0.011895322 | PIK3C2B, PIKFYVE, CALM3, INPP4B, PIP5K1A, PIK3R1                                                     |
| Fc epsilon RI signaling pathway       | 6     | 6.5934066 | 0.0021095 | 0.01880995  | PDK1, HRAS, FYN, AKT3, MAP2K6, PIK3R1                                                                |
| Non-small cell lung cancer            | 5     | 5.4945055 | 0.003568  | 0.019191213 | HRAS, CCND1, TP53, AKT3, PIK3R1                                                                      |
| Axon guidance                         | 7     | 7.6923077 | 0.0038681 | 0.02325531  | EPHA4, HRAS, EPHB6, LIMK2, ROBO1, FYN, PLXNB2                                                        |
| Fc gamma R-mediated phagocytosis      | 6     | 6.5934066 | 0.0049704 | 0.025122413 | LIMK2, HCK, PIKFYVE, PIP5K1A, AKT3, PIK3R1                                                           |
| GnRH signaling pathway                | 6     | 6.5934066 | 0.0056712 | 0.037135172 | HRAS, JUN, CAMK2D, CALM3, GNAS, MAP2K6                                                               |
| Focal adhesion                        | 8     | 8.7912088 | 0.0088645 | 0.049605821 | HRAS, CCND1, FYN, JUN, ILK, FLNB, AKT3, PIK3R1                                                       |
| Adherens junction                     | 5     | 5.4945055 | 0.0124913 | 0.049066116 | FYN, TGFBR2, SMAD4, CDH1, INSR                                                                       |
| Bladder cancer                        | 4     | 4.3956044 | 0.0129372 | 0.073016493 | HRAS, CCND1, TP53, CDH1                                                                              |
| Prostate cancer                       | 5     | 5.4945055 | 0.0203068 | 0.071758939 | HRAS, CCND1, TP53, AKT3, PIK3R1                                                                      |
| Insulin signaling pathway             | 6     | 6.5934066 | 0.0208056 | 0.083465575 | HRAS, PRKAR1A, CALM3, INSR, AKT3, PIK3R1                                                             |
| Inositol phosphate metabolism         | 4     | 4.3956044 | 0.0253083 | 0.096635656 | PIK3C2B, PIKFYVE, INPP4B, PIP5K1A                                                                    |
| Toll-like receptor signaling pathway  | 5     | 5.4945055 | 0.0306084 | 0.096883875 | JUN, RIPK1, AKT3, MAP2K6, PIK3R1                                                                     |
| Wnt signaling pathway                 | 6     | 6.5934066 | 0.0318513 | 0.132025268 | CCND1, JUN, CAMK2D, SMAD4, TP53, APC                                                                 |

|                        |   |           |           |             |                              |
|------------------------|---|-----------|-----------|-------------|------------------------------|
| Long-term potentiation | 4 | 4.3956044 | 0.0455713 | 0.136841201 | RPS6KA6, HRAS, CAMK2D, CALM3 |
|------------------------|---|-----------|-----------|-------------|------------------------------|

# T5

Negative -  
below

| Pathways positively enriched with TRIM24                          |      |             |            |           |            |            |             |                                 |  |
|-------------------------------------------------------------------|------|-------------|------------|-----------|------------|------------|-------------|---------------------------------|--|
| NAME                                                              | SIZE | FDR q-val   | ES         | NES       | NOM p-val  | FWER p-val | RANK AT MAX | LEADING EDGE                    |  |
| KEGG_OOCYTE_MEIOSIS                                               | 87   | 0.06407774  | 0.52151257 | 1.8744404 | 0          | 0.495      | 2107        | tags=40%, list=20%, signal=50%  |  |
| REACTOME_DEADENYLATION_DEPENDENT_MRNA_DECAY                       | 35   | 0.06433764  | 0.6259229  | 1.8780497 | 0.00381679 | 0.485      | 2554        | tags=66%, list=25%, signal=87%  |  |
| REACTOME_KINESINS                                                 | 18   | 0.06713493  | 0.83313584 | 1.8781717 | 0.00191939 | 0.485      | 973         | tags=72%, list=9%, signal=80%   |  |
| PID_AURORA_B_PATHWAY                                              | 34   | 0.06794949  | 0.7155593  | 1.8576249 | 0.00763359 | 0.543      | 1499        | tags=65%, list=14%, signal=75%  |  |
| REACTOME_TRANSPORT_OF_MATURE_MRNA_DERIVED_FROM_AN_INTRONLESS      | 28   | 0.06845118  | 0.7171073  | 1.882034  | 0.00389105 | 0.474      | 1823        | tags=75%, list=18%, signal=91%  |  |
| REACTOME_ANTIGEN_PROCESSING_UBIQUITINATION_PROTEASOME_DEGRADATION | 149  | 0.07023305  | 0.49986956 | 1.8580425 | 0.00185529 | 0.543      | 2162        | tags=44%, list=21%, signal=54%  |  |
| REACTOME_GLUCOSE_TRANSPORT                                        | 36   | 0.070659    | 0.63171184 | 1.8839049 | 0.00185874 | 0.469      | 1823        | tags=56%, list=18%, signal=67%  |  |
| REACTOME_TRANSCRIPTION                                            | 131  | 0.07192238  | 0.5535502  | 1.9142996 | 0.00546448 | 0.38       | 2460        | tags=60%, list=24%, signal=78%  |  |
| REACTOME_MITOTIC_G2_M_PHASES                                      | 68   | 0.07214313  | 0.56096804 | 1.847535  | 0.00546448 | 0.567      | 1560        | tags=44%, list=15%, signal=52%  |  |
| REACTOME_NEP_NS2_INTERACTS_WITH_THE_CELLULAR_EXPORT_MACHINERY     | 25   | 0.07262644  | 0.75148666 | 1.8586549 | 0.00195313 | 0.542      | 1823        | tags=80%, list=18%, signal=97%  |  |
| REACTOME_ANTIVIRAL_MECHANISM_BY_IFN_STIMULATED_GENES              | 60   | 0.07322135  | 0.61327076 | 1.8851805 | 0          | 0.466      | 2136        | tags=55%, list=21%, signal=69%  |  |
| KEGG_RNA_DEGRADATION                                              | 43   | 0.07602149  | 0.598397   | 1.9153907 | 0          | 0.376      | 2554        | tags=58%, list=25%, signal=77%  |  |
| REACTOME_REGULATION_OF_GLUKOKINASE_BY_GLUKOKINASE_REGULATORY      | 25   | 0.07689999  | 0.71516156 | 1.8855654 | 0.00189753 | 0.464      | 1823        | tags=72%, list=18%, signal=87%  |  |
| REACTOME_TRANSPORT_OF_RIBONUCLEOPROTEINS_INTO_THE_HOST_NUCLEUS    | 25   | 0.078276835 | 0.75012314 | 1.8890096 | 0          | 0.45       | 1823        | tags=80%, list=18%, signal=97%  |  |
| REACTOME_LATE_PHASE_OF_HIV_LIFE_CYCLE                             | 88   | 0.0798239   | 0.5532845  | 1.8321847 | 0.00570342 | 0.602      | 2445        | tags=63%, list=23%, signal=81%  |  |
| REACTOME_TRANSPORT_OF_MATURE_TRANSCRIPT_TO_CYTOPLASM              | 39   | 0.08047694  | 0.6861041  | 1.8974146 | 0.00387597 | 0.428      | 2513        | tags=79%, list=24%, signal=104% |  |
| REACTOME_MEIOSIS                                                  | 62   | 0.081455134 | 0.5958074  | 1.9161471 | 0          | 0.376      | 3052        | tags=69%, list=29%, signal=98%  |  |
| BIOCARTA_ATTRBCA_PATHWAY                                          | 19   | 0.08189245  | 0.76268107 | 1.890015  | 0          | 0.447      | 1955        | tags=79%, list=19%, signal=97%  |  |
| REACTOME_MEIOTIC_RECOMBINATION                                    | 37   | 0.08225334  | 0.64033824 | 1.8254842 | 0.00187617 | 0.62       | 3052        | tags=78%, list=29%, signal=110% |  |
| REACTOME_INTERACTIONS_OF_VPR_WITH_HOST_CELLULAR_PROTEINS          | 29   | 0.083246626 | 0.72805715 | 1.9221653 | 0.00195313 | 0.36       | 1823        | tags=72%, list=18%, signal=88%  |  |
| REACTOME_MRNA_3_END_PROCESSING                                    | 21   | 0.08412655  | 0.6913187  | 1.8157525 | 0.00585938 | 0.646      | 2513        | tags=71%, list=24%, signal=94%  |  |
| REACTOME_RNA_POL_II_TRANSCRIPTION                                 | 79   | 0.08625827  | 0.55333495 | 1.8029414 | 0.01094891 | 0.674      | 2513        | tags=61%, list=24%, signal=79%  |  |
| REACTOME_METABOLISM_OF_NON_CODING_RNA                             | 40   | 0.086275935 | 0.6659836  | 1.8163214 | 0.00575816 | 0.644      | 2460        | tags=73%, list=24%, signal=95%  |  |
| REACTOME_TELOMERE_MAINTENANCE                                     | 41   | 0.08643117  | 0.6809423  | 1.8053694 | 0.01328273 | 0.665      | 2077        | tags=66%, list=20%, signal=82%  |  |
| REACTOME_HIV_LIFE_CYCLE                                           | 100  | 0.08865291  | 0.5444222  | 1.805871  | 0.00948767 | 0.664      | 2445        | tags=60%, list=23%, signal=78%  |  |
| REACTOME_MEIOTIC_SYNOPSIS                                         | 38   | 0.089806385 | 0.6271161  | 1.9236449 | 0          | 0.357      | 2529        | tags=66%, list=24%, signal=87%  |  |
| PID_PLK1_PATHWAY                                                  | 39   | 0.09298865  | 0.7054155  | 1.9397254 | 0.00365631 | 0.311      | 569         | tags=54%, list=5%, signal=57%   |  |
| PID_BARD1_PATHWAY                                                 | 27   | 0.09308295  | 0.7055288  | 1.7913538 | 0.00592885 | 0.708      | 1937        | tags=63%, list=19%, signal=77%  |  |
| REACTOME_MITOTIC_M_M_G1_PHASES                                    | 139  | 0.094886385 | 0.6783716  | 1.9275595 | 0.00372439 | 0.348      | 1507        | tags=58%, list=14%, signal=66%  |  |
| REACTOME_CLEAVAGE_OF_GROWING_TRANSCRIPT_IN_THE_TERMINATION_REGION | 28   | 0.095086835 | 0.6797084  | 1.7862389 | 0.00568182 | 0.724      | 2513        | tags=71%, list=24%, signal=94%  |  |
| PID_E2F_PATHWAY                                                   | 64   | 0.09586132  | 0.53454643 | 1.7817421 | 0.00727273 | 0.731      | 1391        | tags=39%, list=13%, signal=45%  |  |
| REACTOME_G2_M_CHECKPOINTS                                         | 31   | 0.096607305 | 0.74741536 | 1.7747201 | 0.01325758 | 0.75       | 1423        | tags=71%, list=14%, signal=82%  |  |
| KEGG_CELL_CYCLE                                                   | 104  | 0.096872516 | 0.5586234  | 1.777332  | 0.01296296 | 0.741      | 1486        | tags=45%, list=14%, signal=52%  |  |
| REACTOME_LOSS_OF_NLP_FROM_MITOTIC_CENTROSOMES                     | 47   | 0.097130485 | 0.5405905  | 1.7687203 | 0.00749064 | 0.763      | 1313        | tags=36%, list=13%, signal=41%  |  |
| REACTOME_CELL_CYCLE_MITOTIC                                       | 258  | 0.09823454  | 0.6341808  | 2.0153189 | 0.00365631 | 0.155      | 1507        | tags=51%, list=13%, signal=58%  |  |
| PID_ATM_PATHWAY                                                   | 30   | 0.09938273  | 0.62878406 | 1.7688948 | 0.00558659 | 0.763      | 2299        | tags=63%, list=22%, signal=81%  |  |
| REACTOME_G0_AND_EARLY_G1                                          | 18   | 0.09997691  | 0.7448777  | 1.763292  | 0.00764818 | 0.778      | 1391        | tags=61%, list=13%, signal=70%  |  |
| REACTOME_MRNA_PROCESSING                                          | 110  | 0.10061881  | 0.5523103  | 1.7504597 | 0.01526718 | 0.813      | 2554        | tags=59%, list=25%, signal=77%  |  |
| PID_P53REGULATION_PATHWAY                                         | 50   | 0.10128432  | 0.51185733 | 1.7545682 | 0.00383877 | 0.804      | 1691        | tags=42%, list=16%, signal=50%  |  |
| REACTOME_CELL_CYCLE_CHECKPOINTS                                   | 93   | 0.10151619  | 0.63477147 | 1.7593431 | 0.01498127 | 0.787      | 2338        | tags=63%, list=23%, signal=89%  |  |
| REACTOME_DEADENYLATION_OF_MRNA                                    | 16   | 0.101887636 | 0.6784746  | 1.7514621 | 0.00410678 | 0.81       | 2389        | tags=75%, list=23%, signal=97%  |  |
| REACTOME_DENYATION_OF_NEW_CENPA_CONTAINING_NUCLEOSOMES_AT_T       | 25   | 0.102042675 | 0.7110379  | 1.7388387 | 0.01333333 | 0.834      | 2077        | tags=76%, list=20%, signal=95%  |  |
| REACTOME_MITOTIC_G1_G1_S_PHASES                                   | 112  | 0.10254448  | 0.59615666 | 1.7406121 | 0.01679105 | 0.83       | 1499        | tags=45%, list=14%, signal=52%  |  |
| REACTOME_ACTIVATION_OF_ATR_IN_RESPONSE_TO_REPLICATION_STRESS      | 26   | 0.10291234  | 0.7647587  | 1.7552145 | 0.01330799 | 0.802      | 1423        | tags=73%, list=14%, signal=84%  |  |
| REACTOME_FACTORS_INVOLVED_IN_MEGAKARYOCYTE_DEVELOPMENT_AND_F      | 89   | 0.10314614  | 0.44948667 | 1.7423247 | 0.00513699 | 0.828      | 1554        | tags=30%, list=15%, signal=35%  |  |
| REACTOME_SIGNALING_BY_TGF_BETA_RECEPTOR_COMPLEX                   | 53   | 0.10343303  | 0.49065134 | 1.7442812 | 0.00178571 | 0.825      | 2029        | tags=47%, list=19%, signal=58%  |  |
| PID_ATR_PATHWAY                                                   | 36   | 0.104035236 | 0.7386535  | 1.9400665 | 0.00184843 | 0.311      | 1423        | tags=67%, list=14%, signal=77%  |  |
| REACTOME_G1_S_TRANSITION                                          | 92   | 0.10675577  | 0.6184406  | 1.7310522 | 0.02052239 | 0.851      | 1595        | tags=50%, list=15%, signal=59%  |  |
| REACTOME_E2F_MEDIATED_REGULATION_OF_DNA_REPLICATION               | 22   | 0.10905583  | 0.6760333  | 1.7295576 | 0.02067669 | 0.861      | 1391        | tags=59%, list=13%, signal=68%  |  |
| REACTOME_REGULATION_OF_MITOTIC_CELL_CYCLE                         | 68   | 0.11119936  | 0.6387584  | 1.7213694 | 0.02385321 | 0.871      | 2228        | tags=60%, list=21%, signal=76%  |  |
| PID_FANCONI_PATHWAY                                               | 36   | 0.117885515 | 0.73211044 | 1.9411031 | 0.00188324 | 0.308      | 1955        | tags=72%, list=19%, signal=89%  |  |
| REACTOME_PACKAGING_OF_TELOMERE_ENDS                               | 18   | 0.118495315 | 0.68107355 | 1.6903661 | 0.02457467 | 0.916      | 2352        | tags=72%, list=23%, signal=93%  |  |
| REACTOME_TRANSCRIPTIONAL_ACTIVITY_OF_SMAD2_SMAD3_SMAD4_HETERO     | 33   | 0.11935501  | 0.51551384 | 1.6913769 | 0.00549451 | 0.914      | 2029        | tags=48%, list=19%, signal=60%  |  |
| REACTOME_PROCESSING_OF_CAPPED_INTRON_CONTAINING_PRE_MRNA          | 97   | 0.119671956 | 0.55975544 | 1.7101259 | 0.02681992 | 0.886      | 2554        | tags=60%, list=25%, signal=78%  |  |
| REACTOME_DNA_STRAND_ELONGATION                                    | 26   | 0.120333225 | 0.76699644 | 1.6859914 | 0.01904762 | 0.919      | 1247        | tags=69%, list=12%, signal=78%  |  |
| KEGG_VIBRIO_CHOLERAE_INFECTION                                    | 45   | 0.120374754 | 0.51593    | 1.6964225 | 0.01289135 | 0.908      | 3008        | tags=53%, list=29%, signal=75%  |  |
| REACTOME_DNA_REPAIR                                               | 89   | 0.12055682  | 0.5142796  | 1.6922164 | 0.02616822 | 0.914      | 1937        | tags=49%, list=19%, signal=60%  |  |
| REACTOME_DOUBLE_STRAND_BREAK_REPAIR                               | 22   | 0.12056231  | 0.65992707 | 1.6944016 | 0.02573529 | 0.909      | 2299        | tags=64%, list=22%, signal=82%  |  |
| REACTOME_RNA_POL_I_RNA_POL_III_AND_MITOCHONDRIAL_TRANSCRIPTION    | 63   | 0.12074049  | 0.5043358  | 1.683728  | 0.01841621 | 0.925      | 2445        | tags=57%, list=23%, signal=74%  |  |
| REACTOME_SYNTHESIS_OF_DNA                                         | 77   | 0.1209472   | 0.64069414 | 1.6996429 | 0.02578269 | 0.905      | 1595        | tags=51%, list=15%, signal=59%  |  |
| REACTOME_RECRUITMENT_OF_MITOTIC_CENTROSOME_PROTEINS_AND_COM       | 53   | 0.12102578  | 0.505388   | 1.7043699 | 0.00914077 | 0.898      | 1313        | tags=36%, list=13%, signal=41%  |  |
| REACTOME_S_PHASE                                                  | 92   | 0.121185385 | 0.61691564 | 1.6974783 | 0.03142329 | 0.907      | 1595        | tags=49%, list=15%, signal=57%  |  |
| REACTOME_CHROMOSOME_MAINTENANCE                                   | 74   | 0.121254615 | 0.6744589  | 2.0221937 | 0          | 0.145      | 2077        | tags=64%, list=20%, signal=79%  |  |
| REACTOME_CLASS_I_MHC_MEDIATED_ANTIGEN_PROCESSING_PRESENTATION     | 182  | 0.121795036 | 0.44952235 | 1.7008208 | 0.00550459 | 0.902      | 2177        | tags=41%, list=21%, signal=51%  |  |
| REACTOME_DOWNREGULATION_OF_SMAD2_3_SMAD4_TRANSCRIPTIONAL_AC       | 18   | 0.12293223  | 0.6063839  | 1.7045463 | 0.00787402 | 0.898      | 2029        | tags=56%, list=19%, signal=69%  |  |
| REACTOME_HIV_INFECTION                                            | 172  | 0.12411085  | 0.5002294  | 1.676016  | 0.02420857 | 0.934      | 1909        | tags=44%, list=18%, signal=53%  |  |
| REACTOME_MITOTIC_PROMETAPHASE                                     | 69   | 0.12437699  | 0.7039699  | 1.9513204 | 0.00189036 | 0.286      | 1507        | tags=64%, list=14%, signal=74%  |  |
| PID_FOXO_PATHWAY                                                  | 45   | 0.124811955 | 0.48527598 | 1.6734878 | 0.0088968  | 0.939      | 1691        | tags=40%, list=16%, signal=48%  |  |
| REACTOME_PROCESSING_OF_CAPPED_INTRONLESS_PRE_MRNA                 | 18   | 0.12513752  | 0.6940431  | 1.6767459 | 0.01934236 | 0.934      | 2460        | tags=72%, list=24%, signal=94%  |  |
| REACTOME_DNA_REPLICATION                                          | 158  | 0.13021842  | 0.6848052  | 1.9630483 | 0.00368324 | 0.254      | 1507        | tags=58%, list=14%, signal=66%  |  |
| REACTOME_ACTIVATION_OF_THE_PRE_REPLICATIVE_COMPLEX                | 21   | 0.13126844  | 0.77417374 | 1.6624975 | 0.01934236 | 0.942      | 867         | tags=67%, list=8%, signal=73%   |  |
| KEGG_DNA_REPLICATION                                              | 32   | 0.13128528  | 0.71137786 | 1.6660499 | 0.03780719 | 0.944      | 2042        | tags=72%, list=20%, signal=89%  |  |
| PID_MYC_ACTIVATION_PATHWAY                                        | 68   | 0.13238217  | 0.513319   | 1.6634464 | 0.03825137 | 0.942      | 2818        | tags=51%, list=27%, signal=70%  |  |
| REACTOME_RNA_POL_I_TRANSCRIPTION                                  | 35   | 0.13567908  | 0.54072607 | 1.6540781 | 0.03096539 | 0.95       | 2445        | tags=60%, list=23%, signal=78%  |  |
| BIOCARTA_MPR_PATHWAY                                              | 29   | 0.13573524  | 0.53412044 | 1.6523368 | 0.01834862 | 0.95       | 2064        | tags=52%, list=20%, signal=64%  |  |
| PID_NFAT3_PATHWAY                                                 | 47   | 0.13881032  | 0.45721254 | 1.6474698 | 0.01621622 | 0.952      | 1586        | tags=34%, list=15%, signal=40%  |  |
| REACTOME_APC_CD20_MEDIATED_DEGRADATION_OF_NEK2A                   | 17   | 0.14737275  | 0.65242016 | 1.6372324 | 0.02985075 | 0.962      | 2107        | tags=76%, list=20%, signal=96%  |  |
| REACTOME_EXTENSION_OF_TELOMERS                                    | 23   | 0.14907688  | 0.71080786 | 1.6337173 | 0.03738318 | 0.963      | 1247        | tags=57%, list=12%, signal=64%  |  |
| KEGG_BASAL_TRANSCRIPTION_FACTORS                                  | 27   | 0.15401207  | 0.5408654  | 1.6272129 | 0.02123552 | 0.967      | 2387        | tags=59%, list=23%, signal=77%  |  |
| KEGG_PROGESTERONE_MEDIATED_OOCYTE_MATURATION                      | 72   | 0.1632321   | 0.44447088 | 1.6120628 | 0.01067616 | 0.977      | 2137        | tags=43%, list=21%, signal=54%  |  |
| BIOCARTA_G2_PATHWAY                                               | 23   | 0.1646114   | 0.6010924  | 1.6125305 | 0.03136531 | 0.977      | 2451        | tags=65%, list=24%, signal=85%  |  |
| REACTOME_CELL_CYCLE                                               | 309  | 0.16471994  | 0.6169384  | 2.0326982 | 0.00361011 | 0.129      | 2077        | tags=55%, list=20%, signal=67%  |  |
| REACTOME_RNA_POL_II_PRE_TRANSCRIPTION_EVENTS                      | 51   | 0.16534413  | 0.49104476 | 1.604849  | 0.03683241 | 0.979      | 2445        | tags=55%, list=23%, signal=71%  |  |
| KEGG_MISMATCH_REPAIR                                              | 22   | 0.16576818  | 0.6484285  | 1.6131997 | 0.03512015 | 0.976      | 1247        | tags=45%, list=12%, signal=52%  |  |
| KEGG_NUCLEOTIDE_EXCISION_REPAIR                                   | 40   | 0.16580872  | 0.51853645 | 1.6027012 | 0.03795067 | 0.979      | 1313        | tags=43%, list=13%, signal=48%  |  |
| REACTOME_M_G1_TRANSITION                                          | 66   | 0.16619298  | 0.6319666  | 1.6057734 | 0.05639098 | 0.979      | 1595        | tags=52%, list=15%, signal=60%  |  |
| PID_CD42_PATHWAY                                                  | 60   | 0.16620177  | 0.44910452 | 1.6146843 | 0.01298701 | 0.976      | 2300        | tags=42%, list=22%, signal=53%  |  |
| PID_FOXM1_PATHWAY                                                 | 38   | 0.1672106   | 0.5534771  | 1.6065508 | 0.05128205 | 0.979      | 1293        | tags=45%, list=12%, signal=51%  |  |
| REACTOME_HOST_INTERACTIONS_OF_HIV_FACTORS                         |      |             |            |           |            |            |             |                                 |  |

|                                                                             |     |            |            |           |            |       |      |                                 |
|-----------------------------------------------------------------------------|-----|------------|------------|-----------|------------|-------|------|---------------------------------|
| REACTOME LAGGING STRAND SYNTHESIS                                           | 17  | 0.17240992 | 0.7154413  | 1.5917407 | 0.04460967 | 0.985 | 1247 | tags=59%, list=12%, signal=67%  |
| REACTOME APC_C_CDC20_MEDIATED_DEGRADATION_OF_MITOTIC_PROTEINS               | 57  | 0.1811984  | 0.60192    | 1.58256   | 0.07063197 | 0.988 | 2228 | tags=58%, list=21%, signal=73%  |
| REACTOME APC_C_CDH1_MEDIATED_DEGRADATION_OF_CDC20_AND_OTHER_KEGG_SPLICesome | 57  | 0.19812818 | 0.59770286 | 1.5670825 | 0.0742115  | 0.99  | 2228 | tags=58%, list=21%, signal=73%  |
| KEGG_HOMOLOGOUS_RECOMBINATION                                               | 25  | 0.20534082 | 0.6054251  | 1.5575466 | 0.06179775 | 0.991 | 2042 | tags=56%, list=20%, signal=65%  |
| REACTOME_CYCLIN_E_ASSOCIATED_EVENTS_DURING_G1_S_TRANSITION                  | 59  | 0.2193444  | 0.56081754 | 1.5450006 | 0.0873606  | 0.995 | 1800 | tags=52%, list=17%, signal=53%  |
| REACTOME_RNA_POL_I_PROMOTER_OPENING                                         | 16  | 0.22835203 | 0.6499947  | 1.5367987 | 0.06857143 | 0.997 | 3038 | tags=44%, list=19%, signal=115% |
| PID_PI3KCIK1PATHWAY                                                         | 31  | 0.23155028 | 0.4581829  | 1.5327475 | 0.03018109 | 0.997 | 1293 | tags=32%, list=12%, signal=37%  |
| REACTOME_ORC1_REMOVAL_FROM_CHROMATIN                                        | 55  | 0.23914647 | 0.5846298  | 1.5236588 | 0.0988806  | 0.997 | 2913 | tags=64%, list=28%, signal=88%  |
| REACTOME_REGULATION_OF_MRNA_STABILITY_BY_PROTEINS_THAT_BIND_AU              | 70  | 0.24074456 | 0.51165193 | 1.524294  | 0.07933579 | 0.997 | 2913 | tags=60%, list=28%, signal=83%  |
| REACTOME_REGULATION_OF_MRNA_STABILITY_BY_PROTEINS_THAT_BIND_AU              | 70  | 0.24074456 | 0.51165193 | 1.524294  | 0.07933579 | 0.997 | 2913 | tags=60%, list=28%, signal=83%  |
| REACTOME_REGULATION_OF_MRNA_STABILITY_BY_PROTEINS_THAT_BIND_AU              | 70  | 0.24074456 | 0.51165193 | 1.524294  | 0.07933579 | 0.997 | 2913 | tags=60%, list=28%, signal=83%  |
| BIOCARTA_PROTEASOME_PATHWAY                                                 | 26  | 0.24789473 | 0.65029293 | 1.5158061 | 0.09477756 | 0.997 | 2912 | tags=77%, list=28%, signal=107% |
| PID_TELOMERASEPATHWAY                                                       | 62  | 0.26376665 | 0.41596246 | 1.5031215 | 0.02973978 | 0.997 | 2221 | tags=40%, list=21%, signal=51%  |
| PID_INSULIN_GLUCOSE_PATHWAY                                                 | 21  | 0.26954383 | 0.4841086  | 1.4975495 | 0.06578948 | 0.997 | 802  | tags=29%, list=8%, signal=31%   |
| REACTOME_SGSKP2_MEDIATED_DEGRADATION_OF_P27_P21                             | 50  | 0.27322116 | 0.5779377  | 1.4884555 | 0.11359404 | 0.998 | 1595 | tags=42%, list=15%, signal=49%  |
| REACTOME_SIGNALING_BY_WNT                                                   | 58  | 0.27351007 | 0.5156448  | 1.4931153 | 0.08679245 | 0.998 | 2959 | tags=57%, list=28%, signal=79%  |
| BIOCARTA_ACTINY_PATHWAY                                                     | 17  | 0.27414975 | 0.59575063 | 1.4894589 | 0.06903353 | 0.998 | 2228 | tags=59%, list=21%, signal=75%  |
| REACTOME_ASSEMBLY_OF_THE_PRE_REPLICATIVE_COMPLEX                            | 53  | 0.27478662 | 0.5972967  | 1.49072   | 0.10841122 | 0.998 | 2913 | tags=68%, list=28%, signal=94%  |
| REACTOME_MHC_CLASS_II_ANTIAGEN_PRESENTATION                                 | 77  | 0.2910182  | 0.41678193 | 1.4718512 | 0.07195572 | 0.998 | 2203 | tags=38%, list=21%, signal=47%  |
| SA_G1_AND_S_PHASES                                                          | 15  | 0.29140112 | 0.5932573  | 1.4732578 | 0.08812261 | 0.998 | 2790 | tags=53%, list=27%, signal=73%  |
| PID_ECADHERIN_NASCENTAJ_PATHWAY                                             | 33  | 0.29209745 | 0.4702026  | 1.4746785 | 0.05321101 | 0.998 | 3088 | tags=52%, list=29%, signal=72%  |
| REACTOME_SGSKP2_MEDIATED_DEGRADATION_OF_P27_P21                             | 50  | 0.2930664  | 0.5425524  | 1.0442512 | 0.00187617 | 0.117 | 2381 | tags=51%, list=23%, signal=65%  |
| KEGG_UBIQUITIN_MEDIATED_PROTEOLYSIS                                         | 104 | 0.2930664  | 0.5425524  | 1.0442512 | 0.00187617 | 0.117 | 2381 | tags=51%, list=23%, signal=65%  |
| KEGG_PYRIDINE_METABOLISM                                                    | 71  | 0.2938467  | 0.45504412 | 1.468083  | 0.0754717  | 0.999 | 1902 | tags=41%, list=18%, signal=50%  |
| REACTOME_GENERIC_TRANSCRIPTION_PATHWAY                                      | 200 | 0.29591098 | 0.40078443 | 1.4633963 | 0.09464286 | 0.999 | 2197 | tags=37%, list=21%, signal=46%  |
| REACTOME_TRANSCRIPTION_COUPLED_NER_TC_NER                                   | 39  | 0.29715347 | 0.5048912  | 1.4642608 | 0.08969466 | 0.999 | 1493 | tags=44%, list=14%, signal=51%  |
| REACTOME_RNA_POL_I_TRANSCRIPTION_INITIATION                                 | 18  | 0.3022849  | 0.5227506  | 1.4578091 | 0.08364312 | 0.999 | 2445 | tags=50%, list=23%, signal=65%  |
| REACTOME_AUTODEGRADATION_OF_CDH1_BY_CDH1_APC_C                              | 50  | 0.30503663 | 0.5514066  | 1.4544494 | 0.13197026 | 0.999 | 2228 | tags=52%, list=21%, signal=66%  |
| REACTOME_INSULIN_RECEPTOR_RECYCLING                                         | 17  | 0.31322733 | 0.5596978  | 1.4476588 | 0.11132438 | 0.999 | 1791 | tags=35%, list=17%, signal=43%  |
| PID_AURORA_A_PATHWAY                                                        | 29  | 0.31582433 | 0.4882126  | 1.4442364 | 0.08671587 | 0.999 | 1477 | tags=38%, list=14%, signal=44%  |
| REACTOME_ACTIVATION_OF_NF_KAPPA_B_IN_B_CELLS                                | 55  | 0.32016093 | 0.5122438  | 1.439924  | 0.12037037 | 0.999 | 2913 | tags=56%, list=28%, signal=78%  |
| REACTOME_P53_DEPENDENT_G1_DNA_DAMAGE_RESPONSE                               | 49  | 0.32273537 | 0.5413635  | 1.4333602 | 0.13457943 | 0.999 | 2913 | tags=57%, list=28%, signal=79%  |
| REACTOME_SCF_BETA_TRCP_MEDIATED_DEGRADATION_OF_EMI1                         | 45  | 0.3228216  | 0.5721276  | 1.434911  | 0.13644859 | 0.999 | 1800 | tags=44%, list=17%, signal=54%  |
| REACTOME_NUCLEOTIDE_EXCISION_REPAIR                                         | 44  | 0.3243196  | 0.4686012  | 1.4356334 | 0.09829868 | 0.999 | 1493 | tags=43%, list=14%, signal=50%  |
| REACTOME_MRNA_SPLICING                                                      | 70  | 0.3312156  | 0.4874268  | 1.4230144 | 0.11685824 | 0.999 | 2554 | tags=51%, list=25%, signal=68%  |
| REACTOME_RNA_POL_II_TRANSCRIPTION_PRE_INITIATION_AND_PROMOTER_C             | 33  | 0.33272928 | 0.4737773  | 1.4254011 | 0.09640832 | 0.999 | 1478 | tags=39%, list=14%, signal=46%  |
| KEGG_PROTEASOME                                                             | 40  | 0.33353868 | 0.59199905 | 1.4232576 | 0.15789473 | 0.999 | 2913 | tags=65%, list=28%, signal=90%  |
| KEGG_PROTEIN_EXPORT                                                         | 17  | 0.33893797 | 0.5817911  | 1.416839  | 0.12398374 | 1     | 2853 | tags=53%, list=27%, signal=73%  |
| BIOCARTA_G1_PATHWAY                                                         | 27  | 0.34162378 | 0.4681821  | 1.4117543 | 0.09009009 | 1     | 1423 | tags=30%, list=14%, signal=34%  |
| PID_ADJISS_2PATHWAY                                                         | 45  | 0.34311327 | 0.40989354 | 1.4125097 | 0.06944445 | 1     | 3527 | tags=56%, list=34%, signal=84%  |
| PID_MYC_PATHWAY                                                             | 22  | 0.34561014 | 0.45364535 | 1.4077361 | 0.086629   | 1     | 680  | tags=23%, list=7%, signal=24%   |
| REACTOME_DOWNREGULATION_OF_TGF_BETA_RECEPTOR_SIGNALING                      | 19  | 0.34577858 | 0.49901304 | 1.4044791 | 0.10638298 | 1     | 1793 | tags=47%, list=17%, signal=57%  |
| REACTOME_GLOBAL_GENOMIC_NER_GG_NER                                          | 29  | 0.34756723 | 0.48890918 | 1.4047921 | 0.11742424 | 1     | 1247 | tags=41%, list=12%, signal=47%  |
| BIOCARTA_CK1_PATHWAY                                                        | 15  | 0.3479081  | 0.5118231  | 1.4013877 | 0.10826772 | 1     | 2766 | tags=47%, list=27%, signal=63%  |
| REACTOME_P53_INDEPENDENT_G1_S_DNA_DAMAGE_CHECKPOINT                         | 45  | 0.35084054 | 0.56106424 | 1.3978455 | 0.16165413 | 1     | 1800 | tags=44%, list=17%, signal=54%  |
| REACTOME_TRNA_AMINOACYLATION                                                | 31  | 0.37214202 | 0.5217424  | 1.3826948 | 0.15384616 | 1     | 3089 | tags=61%, list=30%, signal=87%  |
| REACTOME_DESTABILIZATION_OF_MRNA_BY_AUF1_HNRNP_D0                           | 45  | 0.37400493 | 0.54963934 | 1.3656354 | 0.1841065  | 1     | 2913 | tags=60%, list=28%, signal=83%  |
| REACTOME_FORMATION_OF_TUBULIN_FOLDING_INTERMEDIATES_BY_CCT_TR               | 18  | 0.37430072 | 0.5648612  | 1.3685796 | 0.16666667 | 1     | 2036 | tags=56%, list=20%, signal=69%  |
| REACTOME_PERK_REGULATED_GENE_EXPRESSION                                     | 24  | 0.37467763 | 0.46723077 | 1.3828405 | 0.10157618 | 1     | 2514 | tags=54%, list=24%, signal=71%  |
| REACTOME_CDT1_ASSOCIATION_WITH_THE_CDC6_ORC_ORIGIN_COMPLEX                  | 44  | 0.37507027 | 0.5564403  | 1.371387  | 0.1741573  | 1     | 2913 | tags=61%, list=28%, signal=85%  |
| REACTOME_ARM_S_MEDIATED_ACTIVATION                                          | 15  | 0.3753402  | 0.48255786 | 1.374439  | 0.09345795 | 1     | 2255 | tags=47%, list=22%, signal=59%  |
| REACTOME_TGF_BETA_RECEPTOR_SIGNALING_ACTIVATES_SMADS                        | 22  | 0.3754832  | 0.47460604 | 1.3663086 | 0.1183432  | 1     | 1793 | tags=41%, list=17%, signal=49%  |
| REACTOME_RNA_POL_III_TRANSCRIPTION                                          | 28  | 0.37562057 | 0.45738953 | 1.3633449 | 0.12241054 | 1     | 1853 | tags=43%, list=18%, signal=52%  |
| REACTOME_CHOLESTEROL_BIOSYNTHESIS                                           | 18  | 0.37569618 | 0.5541837  | 1.361744  | 0.18518518 | 1     | 3123 | tags=67%, list=30%, signal=95%  |
| REACTOME_ASparagine_N_LINKED_GLYCOSYLATION                                  | 63  | 0.37603804 | 0.4071886  | 1.3755872 | 0.12619503 | 1     | 3073 | tags=52%, list=30%, signal=74%  |
| KEGG_STEROID_BIOSYNTHESIS                                                   | 15  | 0.37648335 | 0.53507626 | 1.3721179 | 0.15568863 | 1     | 3123 | tags=53%, list=30%, signal=76%  |
| PID_ERBB1_INTERNALIZATION_PATHWAY                                           | 37  | 0.37652174 | 0.39843115 | 1.3688426 | 0.09289618 | 1     | 2255 | tags=43%, list=22%, signal=55%  |
| KEGG_AMINOACYL_TRNA_BIOSYNTHESIS                                            | 28  | 0.37823007 | 0.524143   | 1.375938  | 0.1425819  | 1     | 2497 | tags=54%, list=24%, signal=70%  |
| REACTOME_CDK_MEDIATED_PHOSPHORYLATION_AND_REMOVAL_OF_CDC6                   | 43  | 0.37838438 | 0.55780923 | 1.3775302 | 0.17293233 | 1     | 2913 | tags=60%, list=28%, signal=84%  |
| KEGG_BASE_EXCISION_REPAIR                                                   | 31  | 0.38186806 | 0.49267802 | 1.352313  | 0.1716418  | 1     | 1247 | tags=42%, list=12%, signal=48%  |
| REACTOME_DOWNSTREAM_SIGNALING_EVENTS_OF_B_CELL_RECEPTOR_BCR                 | 80  | 0.38435823 | 0.4009764  | 1.3523368 | 0.13898917 | 1     | 2296 | tags=40%, list=12%, signal=51%  |
| REACTOME_REGULATION_OF_APOPTOSIS                                            | 50  | 0.3862315  | 0.49620178 | 1.3527935 | 0.1929499  | 1     | 2244 | tags=46%, list=22%, signal=58%  |
| REACTOME_APOPTOSIS                                                          | 127 | 0.38678256 | 0.37421468 | 1.3539026 | 0.11408199 | 1     | 2913 | tags=47%, list=28%, signal=65%  |
| REACTOME_TRANSPORT_TO_THE_GOLGI_AND_SUBSEQUENT_MODIFICATION                 | 31  | 0.40441602 | 0.4418654  | 1.305327  | 0.15339005 | 1     | 3073 | tags=55%, list=30%, signal=78%  |
| REACTOME_AUTODEGRADATION_OF_THE_E3_UBIQUITIN_LIGASE_COP1                    | 17  | 0.4053378  | 0.52874136 | 1.3343809 | 0.20637898 | 1     | 2913 | tags=56%, list=28%, signal=77%  |
| REACTOME_PROLONGED_ERK_ACTIVATION_EVENTS                                    | 43  | 0.40604326 | 0.4561101  | 1.3310748 | 0.13068181 | 1     | 2782 | tags=53%, list=27%, signal=72%  |
| PID_MET_PATHWAY                                                             | 67  | 0.40620127 | 0.36202857 | 1.3354335 | 0.09323584 | 1     | 2266 | tags=31%, list=22%, signal=40%  |
| REACTOME_CROSS_PRESENTATION_OF_SOLUBLE_EXOGENOUS_ANTIGENS_END               | 41  | 0.4065068  | 0.53687423 | 1.3323131 | 0.21780303 | 1     | 2913 | tags=59%, list=28%, signal=81%  |
| PID_WNT_NONCANONICAL_PATHWAY                                                | 26  | 0.40673724 | 0.429522   | 1.3365818 | 0.11688311 | 1     | 2248 | tags=54%, list=22%, signal=69%  |
| BIOCARTA_TEL_PATHWAY                                                        | 18  | 0.4072894  | 0.4645813  | 1.3227246 | 0.1743295  | 1     | 3403 | tags=61%, list=33%, signal=91%  |
| BIOCARTA_CREB_PATHWAY                                                       | 23  | 0.40891138 | 0.42187116 | 1.3060098 | 0.1534196  | 1     | 3048 | tags=52%, list=29%, signal=74%  |
| REACTOME_REGULATION_OF_ORNITHINE_DECARBOXYLASE_ODC                          | 45  | 0.40926826 | 0.5283949  | 1.3230946 | 0.21797323 | 1     | 2913 | tags=60%, list=28%, signal=83%  |
| REACTOME_TRANSFERRIN_ENDOCYTOSIS_AND_RECYCLING                              | 19  | 0.40937328 | 0.4895233  | 1.3245395 | 0.17366412 | 1     | 1791 | tags=32%, list=17%, signal=38%  |
| PID_ERBB1_DOWNSTREAM_PATHWAY                                                | 92  | 0.40971002 | 0.33505103 | 1.3069867 | 0.11231884 | 1     | 2300 | tags=38%, list=22%, signal=48%  |
| REACTOME_FORMATION_OF_RNA_POL_II_ELONGATION_COMPLEX                         | 37  | 0.4112394  | 0.43226117 | 1.3249519 | 0.13926499 | 1     | 1798 | tags=43%, list=17%, signal=52%  |
| BIOCARTA_ATM_PATHWAY                                                        | 20  | 0.41172582 | 0.45732266 | 1.3072299 | 0.13405797 | 1     | 874  | tags=30%, list=8%, signal=33%   |
| REACTOME_CYTOSOLIC_TRNA_AMINOACYLATION                                      | 20  | 0.4117397  | 0.55478823 | 1.3171179 | 0.20267686 | 1     | 1758 | tags=50%, list=17%, signal=60%  |
| BIOCARTA_CCR3_PATHWAY                                                       | 21  | 0.4118096  | 0.4359449  | 1.3099475 | 0.14310955 | 1     | 2521 | tags=43%, list=24%, signal=56%  |
| BIOCARTA_MITOCYONDRIA_PATHWAY                                               | 19  | 0.41287872 | 0.46041512 | 1.3022697 | 0.1452514  | 1     | 1469 | tags=32%, list=14%, signal=37%  |
| PID_AR_TF_PATHWAY                                                           | 46  | 0.4132813  | 0.38345143 | 1.3105483 | 0.14003591 | 1     | 862  | tags=20%, list=8%, signal=21%   |
| BIOCARTA_TNFR1_PATHWAY                                                      | 28  | 0.4133558  | 0.41317487 | 1.3176546 | 0.12255773 | 1     | 979  | tags=25%, list=9%, signal=28%   |
| REACTOME_APOPTIC_EXECUTION_PHASE                                            | 46  | 0.41346845 | 0.3811402  | 1.307575  | 0.12939002 | 1     | 2871 | tags=50%, list=28%, signal=69%  |
| KEGG_P53_SIGNALING_PATHWAY                                                  | 59  | 0.41406474 | 0.36936128 | 1.3144804 | 0.12190813 | 1     | 1115 | tags=22%, list=11%, signal=25%  |
| PID_P73PATHWAY                                                              | 71  | 0.41575417 | 0.3428265  | 1.3105645 | 0.10238908 | 1     | 735  | tags=18%, list=7%, signal=20%   |
| REACTOME_ASSOCIATION_OF_TRIC_CCT_WITH_TARGET_PROTEINS_DURING                | 16  | 0.4157672  | 0.47826782 | 1.2992668 | 0.19960861 | 1     | 1948 | tags=56%, list=19%, signal=69%  |
| PID_PRLSIGNALINGEVENTSPATHWAY                                               | 20  | 0.41816697 | 0.4434418  | 1.3106145 | 0.17680608 | 1     | 2068 | tags=40%, list=20%, signal=50%  |
| REACTOME_MRNA_CAPPING                                                       | 24  | 0.42045453 | 0.4527907  | 1.2952356 | 0.1741683  | 1     | 1478 | tags=42%, list=14%, signal=48%  |
| REACTOME_VIF_MEDIATED_DEGRADATION_OF_APOBEC3G                               | 46  | 0.42577276 | 0.5150407  | 1.2907393 | 0.25       | 1     | 2913 | tags=57%, list=28%, signal=78%  |
| PID_WNT_CANONICAL_PATHWAY                                                   | 16  | 0.42583096 | 0.45459422 | 1.2893248 | 0.165692   | 1     | 1293 | tags=31%, list=12%, signal=36%  |
| SIG_PIP3_SIGNALING_IN_CARDIAC_MYOCYTES                                      | 62  | 0.4289762  | 0.32782428 | 1.2862085 | 0.09205777 | 1     | 1712 | tags=26%, list=16%, signal=31%  |
| PID_RAC1_PATHWAY                                                            | 44  | 0.43415093 | 0.3770038  | 1.2818105 | 0.16337523 | 1     | 2300 | tags=41%, list=24%, signal=52%  |
| REACTOME_INTRINSIC_PATHWAY_FOR_APOPTOSIS                                    | 25  | 0.4434244  | 0.4281423  | 1.2752316 | 0.15799257 | 1     | 1469 | tags=36%, list=14%, signal=42%  |
| REACTOME_SMAD2_SMAD3_SMAD4_HETEROTRIMER_REGULATES_TRANSCRIPT                | 23  | 0.45613068 | 0.41908595 | 1.26664   | 0.15355805 | 1     | 1756 | tags=39%, list=17%, signal=47%  |
| PID_MTOR_4PATHWAY                                                           | 58  | 0.4570946  | 0.3420726  | 1.2647    | 0.15798923 | 1     | 2020 | tags=28%, list=19%, signal=34%  |
| PID_AR_PATHWAY                                                              | 49  | 0.4676001  | 0.35596374 | 1.257681  | 0.15653776 | 1     | 2138 | tags=41%, list=21%, signal=51%  |

|                                                                 |     |            |            |            |            |   |      |                                  |
|-----------------------------------------------------------------|-----|------------|------------|------------|------------|---|------|----------------------------------|
| REACTOME ADAPTIVE IMMUNE SYSTEM                                 | 412 | 0.47013575 | 0.3189989  | 1.254965   | 0.19494584 | 1 | 2255 | tags=31%, list=22%, signal=38%   |
| REACTOME ENOS ACTIVATION_AND_REGULATION                         | 16  | 0.4739411  | 0.4434454  | 1.2515316  | 0.1953125  | 1 | 1075 | tags=31%, list=10%, signal=35%   |
| KEGG THYROID CANCER                                             | 29  | 0.47957233 | 0.36091068 | 1.24131    | 0.15009381 | 1 | 1625 | tags=28%, list=16%, signal=33%   |
| KEGG RNA POLYMERASE                                             | 21  | 0.479858   | 0.4868234  | 1.2424982  | 0.25925925 | 1 | 1853 | tags=43%, list=18%, signal=52%   |
| REACTOME ELONGATION ARREST_AND_RECOVERY                         | 29  | 0.48025876 | 0.43740997 | 1.2451053  | 0.21960784 | 1 | 1798 | tags=45%, list=17%, signal=54%   |
| REACTOME ABORTIVE ELONGATION_OF_HIV1_TRANSCRIPT_IN_THE_ABSENCE  | 21  | 0.48066488 | 0.48836106 | 1.2434884  | 0.23856859 | 1 | 1478 | tags=43%, list=14%, signal=50%   |
| BIOCARTA MAL PATHWAY                                            | 17  | 0.48251304 | 0.43099785 | 1.2452904  | 0.19851577 | 1 | 2068 | tags=41%, list=20%, signal=51%   |
| BIOCARTA P53 PATHWAY                                            | 16  | 0.4930932  | 0.44211826 | 1.2280332  | 0.21280603 | 1 | 2847 | tags=56%, list=27%, signal=77%   |
| REACTOME PREFOLDIN_MEDIATED_TRANSFER_OF_SUBSTRATE_TO_CCT_TRIC   | 24  | 0.49460116 | 0.4875279  | 1.2301192  | 0.2756654  | 1 | 2036 | tags=46%, list=20%, signal=57%   |
| REACTOME ADHERENS_JUNCTIONS_INTERACTIONS                        | 23  | 0.4947044  | 0.42166618 | 1.2286333  | 0.21350364 | 1 | 1990 | tags=22%, list=19%, signal=27%   |
| REACTOME G1 PHASE                                               | 32  | 0.49633506 | 0.4014409  | 1.2306517  | 0.23649907 | 1 | 3012 | tags=50%, list=29%, signal=70%   |
| BIOCARTA PTDINS PATHWAY                                         | 20  | 0.5088557  | 0.3938643  | 1.2182064  | 0.19428572 | 1 | 2886 | tags=45%, list=28%, signal=62%   |
| KEGG PURINE METABOLISM                                          | 125 | 0.51348424 | 0.30410093 | 1.2141192  | 0.18038529 | 1 | 700  | tags=16%, list=7%, signal=17%    |
| REACTOME_N_GLYCAN_ANTENNAE_ELONGATION_IN_THE_MEDIAL_TRANS_GO    | 16  | 0.5177159  | 0.4393636  | 1.2104529  | 0.23314066 | 1 | 2327 | tags=31%, list=22%, signal=40%   |
| REACTOME PI METABOLISM                                          | 34  | 0.5267114  | 0.37901545 | 1.2041165  | 0.22968198 | 1 | 2681 | tags=41%, list=26%, signal=55%   |
| BIOCARTA IGF1MTOX PATHWAY                                       | 19  | 0.54641885 | 0.40023994 | 1.1923712  | 0.22178988 | 1 | 2886 | tags=53%, list=28%, signal=73%   |
| REACTOME FORMATION_OF_THE_HIV1_EARLY_ELONGATION_COMPLEX         | 27  | 0.5584334  | 0.42561477 | 1.1844033  | 0.26284584 | 1 | 1478 | tags=37%, list=14%, signal=43%   |
| PID_P75NTRPATHWAY                                               | 62  | 0.5710281  | 0.30141145 | 1.176566   | 0.19202898 | 1 | 2131 | tags=27%, list=20%, signal=34%   |
| REACTOME_ER_PHAGOSOME_PATHWAY                                   | 55  | 0.576122   | 0.46538186 | 1.1725123  | 0.34269664 | 1 | 2913 | tags=51%, list=24%, signal=70%   |
| REACTOME RNA_POL_III_TRANSCRIPTION_INITIATION_FROM_TYPE_2_PROMO | 19  | 0.5783453  | 0.43341458 | 1.1657321  | 0.28927204 | 1 | 1853 | tags=37%, list=18%, signal=45%   |
| BIOCARTA BARRESTIN_SRC PATHWAY                                  | 15  | 0.5785551  | 0.4291831  | 1.1641988  | 0.2694497  | 1 | 2020 | tags=47%, list=19%, signal=58%   |
| BIOCARTA RACCYCD PATHWAY                                        | 26  | 0.5793706  | 0.3644484  | 1.169503   | 0.26802218 | 1 | 2886 | tags=46%, list=28%, signal=64%   |
| REACTOME METABOLISM_OF_NUCLEOTIDES                              | 56  | 0.57939506 | 0.36124998 | 1.1566855  | 0.3074074  | 1 | 1920 | tags=38%, list=18%, signal=46%   |
| REACTOME ACTIVATION_OF_GENES_BY_ATF4                            | 21  | 0.58055556 | 0.4086638  | 1.1660726  | 0.27482268 | 1 | 2447 | tags=48%, list=24%, signal=62%   |
| REACTOME SIGNALING_BY_THE_B_CELL_RECEPTOR_BCR                   | 104 | 0.5814603  | 0.32838845 | 1.1570625  | 0.29227942 | 1 | 2913 | tags=41%, list=28%, signal=57%   |
| PID_MAPKTRKPATHWAY                                              | 33  | 0.58223414 | 0.33009687 | 1.1539708  | 0.22463769 | 1 | 2349 | tags=39%, list=24%, signal=51%   |
| KEGG EPITHELIAL_CELL_SIGNALING_IN_HELICOBACTER_PYLORI_INFECTION | 59  | 0.58257335 | 0.3110025  | 1.1664822  | 0.22780569 | 1 | 2046 | tags=32%, list=20%, signal=40%   |
| BIOCARTA CASPASE PATHWAY                                        | 22  | 0.58326226 | 0.43138164 | 1.1589965  | 0.30291972 | 1 | 258  | tags=18%, list=2%, signal=19%    |
| BIOCARTA CELLCYCLE PATHWAY                                      | 21  | 0.5836944  | 0.42676988 | 1.1573721  | 0.3032015  | 1 | 2847 | tags=48%, list=27%, signal=65%   |
| REACTOME MEMBRANE TRAFFICKING                                   | 97  | 0.58400863 | 0.3046184  | 1.160075   | 0.23854962 | 1 | 2183 | tags=32%, list=21%, signal=40%   |
| PID_PI3KPLCTRKPATHWAY                                           | 32  | 0.58755004 | 0.33350873 | 1.1498392  | 0.25411335 | 1 | 2886 | tags=44%, list=28%, signal=60%   |
| PID_CASPASE PATHWAY                                             | 48  | 0.5930302  | 0.31615478 | 1.136209   | 0.29180887 | 1 | 258  | tags=13%, list=2%, signal=13%    |
| KEGG_N_GLYCAN_BIOSYNTHESIS                                      | 34  | 0.59380704 | 0.36819413 | 1.137152   | 0.30632412 | 1 | 2449 | tags=41%, list=24%, signal=54%   |
| KEGG ADHERENS_JUNCTION                                          | 70  | 0.59468913 | 0.3231919  | 1.1449805  | 0.28884825 | 1 | 2020 | tags=26%, list=19%, signal=32%   |
| BIOCARTA CHREBP2 PATHWAY                                        | 36  | 0.59488976 | 0.35601097 | 1.1379507  | 0.30291262 | 1 | 2959 | tags=39%, list=28%, signal=54%   |
| PID_LKB1 PATHWAY                                                | 32  | 0.5974001  | 0.3283887  | 1.1380702  | 0.2605364  | 1 | 1128 | tags=19%, list=11%, signal=21%   |
| ST_G_ALPHA_S PATHWAY                                            | 15  | 0.5974425  | 0.39773527 | 1.1311129  | 0.2911153  | 1 | 2020 | tags=40%, list=19%, signal=50%   |
| REACTOME_SLC_MEDIATED_TRANSMEMBRANE_TRANSPORT                   | 183 | 0.59775025 | 0.2617805  | 1.1323675  | 0.24878837 | 1 | 1942 | tags=21%, list=19%, signal=25%   |
| REACTOME_CTNB1_PHOSPHORYLATION_CASCADE                          | 15  | 0.5989119  | 0.40269738 | 1.1387385  | 0.29577464 | 1 | 2959 | tags=53%, list=28%, signal=74%   |
| KEGG ONE_CARBON_POOL_BY_FOLATE                                  | 15  | 0.599297   | 0.423642   | 1.1399012  | 0.3203125  | 1 | 701  | tags=27%, list=7%, signal=29%    |
| SIG REGULATION_OF_THE_ACTIN_CYTOSKELETON_BY_RHO_GTPASES         | 32  | 0.5995167  | 0.35835466 | 1.1411194  | 0.28675136 | 1 | 2392 | tags=34%, list=23%, signal=44%   |
| REACTOME_MICRORNA_MIRNA_BIOGENESIS                              | 18  | 0.6012417  | 0.41939822 | 1.1213828  | 0.34179688 | 1 | 2251 | tags=44%, list=22%, signal=57%   |
| REACTOME FORMATION_OF_TRANSCRIPTION_COUPLED_NER_TC_NER_REPAIR   | 24  | 0.6019405  | 0.38350514 | 1.1271618  | 0.31384015 | 1 | 1493 | tags=38%, list=14%, signal=44%   |
| BIOCARTA SPPA PATHWAY                                           | 20  | 0.6019786  | 0.37979877 | 1.1223581  | 0.31393299 | 1 | 2020 | tags=35%, list=19%, signal=43%   |
| REACTOME_LIGAND_GATED_ION_CHANNEL_TRANSPORT                     | 20  | 0.6020008  | 0.38097987 | 1.1195972  | 0.3321918  | 1 | 6450 | tags=100%, list=62%, signal=262% |
| REACTOME_MRNA_SPLICING_MINOR_PATHWAY                            | 33  | 0.6036612  | 0.43904623 | 1.1172614  | 0.40582526 | 1 | 1498 | tags=36%, list=14%, signal=42%   |
| PID_LIS1PATHWAY                                                 | 28  | 0.6044827  | 0.36347014 | 1.1224225  | 0.2977099  | 1 | 3003 | tags=50%, list=29%, signal=70%   |
| BIOCARTA STATHMIN PATHWAY                                       | 16  | 0.6065201  | 0.44171384 | 1.122751   | 0.35037878 | 1 | 1680 | tags=25%, list=16%, signal=30%   |
| PID_EPHA2_FWDPATHWAY                                            | 16  | 0.6068591  | 0.38829112 | 1.1239624  | 0.29791272 | 1 | 2848 | tags=44%, list=27%, signal=60%   |
| PID_RB_1PATHWAY                                                 | 62  | 0.6101667  | 0.30095232 | 1.1112653  | 0.2951389  | 1 | 2847 | tags=44%, list=27%, signal=60%   |
| REACTOME_SIGNALING_TO_ERKS                                      | 33  | 0.61198425 | 0.3235859  | 1.1116728  | 0.31588784 | 1 | 2828 | tags=45%, list=27%, signal=62%   |
| ST_G_ALPHA_I PATHWAY                                            | 34  | 0.6161176  | 0.30097687 | 1.1017622  | 0.31858408 | 1 | 2886 | tags=41%, list=28%, signal=57%   |
| REACTOME_INTERFERON_SIGNALING                                   | 126 | 0.616849   | 0.34346092 | 1.1066182  | 0.34358048 | 1 | 2199 | tags=30%, list=21%, signal=38%   |
| REACTOME DARPP_32_EVENTS                                        | 20  | 0.6178579  | 0.3704537  | 1.1022269  | 0.32329318 | 1 | 3077 | tags=40%, list=30%, signal=57%   |
| SIG_CHEMOTAXIS                                                  | 43  | 0.61942416 | 0.31911415 | 1.1041256  | 0.32389382 | 1 | 2438 | tags=33%, list=23%, signal=42%   |
| ST_PHOSPHOINOSITIDE_3_KINASE_PATHWAY                            | 31  | 0.62016654 | 0.3274032  | 1.1023945  | 0.31283906 | 1 | 1712 | tags=26%, list=16%, signal=31%   |
| REACTOME_P75_NTR_RECEPTOR_MEDIATED_SIGNALLING                   | 69  | 0.624886   | 0.2760696  | 1.0868604  | 0.29695886 | 1 | 2006 | tags=25%, list=19%, signal=30%   |
| REACTOME_SIGNALING_BY_FGFR1_MUTANTS                             | 24  | 0.6256609  | 0.35858333 | 1.0837582  | 0.35650623 | 1 | 564  | tags=13%, list=5%, signal=13%    |
| KEGG_PATHOGENIC_ESCHERICHIA_COLI_INFECTION                      | 46  | 0.62623566 | 0.3434038  | 1.0847915  | 0.34432235 | 1 | 2068 | tags=30%, list=20%, signal=38%   |
| PID_HEDGEHOG_GLIPTWAY                                           | 42  | 0.62636954 | 0.30529347 | 1.087382   | 0.3256705  | 1 | 3192 | tags=45%, list=31%, signal=65%   |
| KEGG COLORECTAL CANCER                                          | 61  | 0.6281471  | 0.28631723 | 1.0917737  | 0.30072463 | 1 | 535  | tags=13%, list=5%, signal=14%    |
| BIOCARTA_FAS PATHWAY                                            | 29  | 0.6288894  | 0.35253444 | 1.0874047  | 0.34900543 | 1 | 2879 | tags=48%, list=28%, signal=67%   |
| PID_ECADHERIN_KERATINOCYTE_PATHWAY                              | 19  | 0.6289714  | 0.3716037  | 1.0780008  | 0.3514563  | 1 | 1990 | tags=26%, list=19%, signal=32%   |
| KEGG_WNT_SIGNALING_PATHWAY                                      | 128 | 0.6297566  | 0.2607478  | 1.0882246  | 0.31118882 | 1 | 2959 | tags=37%, list=28%, signal=51%   |
| REACTOME_REGULATORY_RNA_PATHWAYS                                | 19  | 0.629907   | 0.39598498 | 1.0922339  | 0.3625731  | 1 | 2251 | tags=42%, list=22%, signal=54%   |
| PID_SMDA2_3PATHWAY                                              | 15  | 0.6301358  | 0.4237554  | 1.0934883  | 0.34714004 | 1 | 2274 | tags=53%, list=22%, signal=68%   |
| REACTOME_BASE_EXCISION_REPAIR                                   | 18  | 0.6301563  | 0.45541197 | 1.089372   | 0.38076922 | 1 | 1884 | tags=39%, list=18%, signal=47%   |
| REACTOME_PROTEIN_FOLDING                                        | 38  | 0.63030773 | 0.36658296 | 1.0800052  | 0.3752345  | 1 | 2036 | tags=37%, list=20%, signal=46%   |
| KEGG_LONG_TERM_POTENTIATION                                     | 60  | 0.63135195 | 0.2849505  | 1.0780694  | 0.31118882 | 1 | 2451 | tags=32%, list=24%, signal=41%   |
| BIOCARTA_WNT_PATHWAY                                            | 24  | 0.63657695 | 0.34452492 | 1.0726992  | 0.36074767 | 1 | 3247 | tags=46%, list=31%, signal=66%   |
| PID_NETRIN PATHWAY                                              | 28  | 0.63944936 | 0.3512579  | 1.0699525  | 0.38623327 | 1 | 2244 | tags=32%, list=22%, signal=41%   |
| REACTOME_RESOLUTION_OF_AP_SITES_VIA_THE_MULTIPLE_NUCLEOTIDE_PAT | 16  | 0.6446399  | 0.4569175  | 1.0634086  | 0.41020793 | 1 | 1247 | tags=31%, list=12%, signal=35%   |
| PID_BETACATENIN_NUC_PATHWAY                                     | 67  | 0.64598817 | 0.28583315 | 1.0640128  | 0.34362933 | 1 | 889  | tags=15%, list=9%, signal=16%    |
| REACTOME INSULIN SYNTHESIS_AND_PROCESSING                       | 16  | 0.6464673  | 0.41840586 | 1.0611794  | 0.4090909  | 1 | 1187 | tags=31%, list=11%, signal=35%   |
| KEGG_CYSINE_AND_METHIONINE_METABOLISM                           | 31  | 0.64691025 | 0.34833524 | 1.0595555  | 0.39499035 | 1 | 3337 | tags=45%, list=32%, signal=66%   |
| BIOCARTA EIF4 PATHWAY                                           | 22  | 0.64786386 | 0.36728635 | 1.0643877  | 0.36520076 | 1 | 2886 | tags=41%, list=28%, signal=56%   |
| REACTOME_CIRCADIEN_REPRESSION_OF_EXPRESSION_BY_REV_ERBA         | 19  | 0.65316546 | 0.40480113 | 1.0550503  | 0.41984734 | 1 | 611  | tags=21%, list=6%, signal=22%    |
| KEGG SELENOAMINO ACID METABOLISM                                | 19  | 0.6608738  | 0.3712349  | 1.0483633  | 0.38666666 | 1 | 3337 | tags=58%, list=32%, signal=85%   |
| REACTOME_TRAFFICKING_OF_AMPA_RECEPTORS                          | 23  | 0.66302973 | 0.3324784  | 1.0485827  | 0.37523106 | 1 | 2609 | tags=35%, list=25%, signal=46%   |
| PID_HIVNEFPATHWAY                                               | 35  | 0.6654351  | 0.33649364 | 1.0447251  | 0.39317775 | 1 | 1115 | tags=20%, list=11%, signal=22%   |
| ST_FAS_SIGNALING_PATHWAY                                        | 56  | 0.6711593  | 0.28796542 | 1.0405208  | 0.39045936 | 1 | 2068 | tags=29%, list=20%, signal=35%   |
| REACTOME METABOLISM_OF_RNA                                      | 210 | 0.67146784 | 0.33000836 | 1.0390186  | 0.4593573  | 1 | 2180 | tags=37%, list=21%, signal=46%   |
| BIOCARTA_CHEMICAL PATHWAY                                       | 21  | 0.67946774 | 0.3251586  | 1.0337266  | 0.40257353 | 1 | 2029 | tags=33%, list=19%, signal=41%   |
| REACTOME_PRE_NOTCH_TRANSCRIPTION_AND_TRANSLATION                | 18  | 0.68912125 | 0.37906724 | 1.0275477  | 0.42193308 | 1 | 2866 | tags=56%, list=28%, signal=77%   |
| BIOCARTA_HIVNEF PATHWAY                                         | 54  | 0.6986539  | 0.28608215 | 1.0214273  | 0.42408377 | 1 | 1259 | tags=20%, list=12%, signal=23%   |
| PID_P38ALPHA_BETA_DOWNSTREAMPATHWAY                             | 35  | 0.7022964  | 0.2916178  | 1.0181601  | 0.4489051  | 1 | 3005 | tags=46%, list=29%, signal=64%   |
| REACTOME UNFOLDED PROTEIN RESPONSE                              | 68  | 0.70255977 | 0.2827321  | 1.09970853 | 0.44781783 | 1 | 2760 | tags=46%, list=27%, signal=62%   |
| KEGG_LYSINE_DEGRADATION                                         | 37  | 0.70486593 | 0.30981395 | 1.0998011  | 0.42911154 | 1 | 2174 | tags=30%, list=21%, signal=37%   |
| REACTOME RNA_POL_III_TRANSCRIPTION_INITIATION_FROM_TYPE_3_PROMO | 21  | 0.70532644 | 0.35810524 | 1.025734   | 0.45300752 | 1 | 1853 | tags=38%, list=18%, signal=46%   |
| PID_S1P_META_PATHWAY                                            | 15  | 0.705336   | 0.3476084  | 1.0008602  | 0.4494382  | 1 | 1979 | tags=33%, list=19%, signal=41%   |
| REACTOME GOLGI ASSOCIATED VESICLE BIOGENESIS                    | 41  | 0.70533675 | 0.30678266 | 1.015187   | 0.43333334 | 1 | 2773 | tags=39%, list=27%, signal=53%   |
| REACTOME_SIGNALING_BY_BMP                                       | 19  | 0.70534074 | 0.39330217 | 1.0059751  | 0.47206166 | 1 | 2502 | tags=47%, list=24%, signal=62%   |
| REACTOME PURINE METABOLISM                                      | 27  | 0.70555043 | 0.3415163  | 1.0137758  | 0.45167285 | 1 | 679  | tags=22%, list=7%, signal=24%    |

|                                                                |     |            |            |            |             |   |      |                                 |
|----------------------------------------------------------------|-----|------------|------------|------------|-------------|---|------|---------------------------------|
| KEGG_MATURITY_ONSET_DIABETES_OF_THE_YOUNG                      | 19  | 0.7064448  | 0.34273946 | 1.0041679  | 0.4581105   | 1 | 3778 | tags=42%, list=36%, signal=66%  |
| PID_ERBB1_RECEPTOR_PROXIMAL_PATHWAY                            | 34  | 0.7065465  | 0.3016492  | 1.0080081  | 0.45212767  | 1 | 3029 | tags=50%, list=29%, signal=70%  |
| KEGG_PROSTATE_CANCER                                           | 84  | 0.70696884 | 0.24520151 | 1.0013285  | 0.45913044  | 1 | 2886 | tags=36%, list=28%, signal=49%  |
| PID_RETINOIC_ACID_PATHWAY                                      | 28  | 0.7076546  | 0.31329688 | 1.0060858  | 0.44787645  | 1 | 2886 | tags=43%, list=28%, signal=59%  |
| REACTOME_ENDOSOMAL_SORTING_COMPLEX_REQUIRED_FOR_TRANSPORT_ES   | 18  | 0.70886123 | 0.35967836 | 1.0081521  | 0.41967872  | 1 | 1977 | tags=39%, list=19%, signal=48%  |
| REACTOME_RNA_POL_I_TRANSCRIPTION_TERMINATION                   | 16  | 0.7089152  | 0.35767385 | 1.001625   | 0.45167285  | 1 | 3083 | tags=56%, list=30%, signal=80%  |
| BIOCARTA_HSP27_PATHWAY                                         | 15  | 0.7120075  | 0.3554067  | 1.0087749  | 0.44322345  | 1 | 1115 | tags=20%, list=11%, signal=22%  |
| PID_NECTIN_PATHWAY                                             | 28  | 0.71940273 | 0.33748394 | 0.9897298  | 0.4681648   | 1 | 1928 | tags=32%, list=19%, signal=39%  |
| REACTOME_CREB_PHOSPHORYLATION_THROUGH_THE_ACTIVATION_OF_RAS    | 24  | 0.7218646  | 0.3085464  | 0.9871965  | 0.48428836  | 1 | 2281 | tags=29%, list=22%, signal=37%  |
| PID_S1P_S1P2_PATHWAY                                           | 22  | 0.72188413 | 0.3362593  | 0.9832866  | 0.46095237  | 1 | 2020 | tags=36%, list=19%, signal=45%  |
| REACTOME_PRE_NOTCH_EXPRESSION_AND_PROCESSING                   | 30  | 0.7227308  | 0.3044514  | 0.9853906  | 0.48021582  | 1 | 2866 | tags=47%, list=28%, signal=64%  |
| REACTOME_EGFR_DOWNREGULATION                                   | 22  | 0.723682   | 0.30993477 | 0.98112196 | 0.47495362  | 1 | 876  | tags=18%, list=8%, signal=20%   |
| BIOCARTA_RHO_PATHWAY                                           | 29  | 0.72402203 | 0.32073298 | 0.98346    | 0.48181817  | 1 | 2438 | tags=41%, list=23%, signal=54%  |
| PID_P51PATHWAY                                                 | 39  | 0.72544223 | 0.27610815 | 0.9777518  | 0.47689465  | 1 | 3293 | tags=51%, list=32%, signal=75%  |
| REACTOME_RORA_ACTIVATES_CIRCADIAN_EXPRESSION                   | 21  | 0.7259715  | 0.36612472 | 0.97868913 | 0.47674417  | 1 | 611  | tags=19%, list=6%, signal=20%   |
| KEGG_ERBB_SIGNALING_PATHWAY                                    | 79  | 0.74188924 | 0.24498089 | 0.9628762  | 0.49373883  | 1 | 2255 | tags=29%, list=22%, signal=37%  |
| REACTOME_POST_TRANSLATIONAL_PROTEIN_MODIFICATION               | 127 | 0.7421879  | 0.25160673 | 0.9666894  | 0.48846152  | 1 | 3073 | tags=39%, list=30%, signal=54%  |
| PID_NCADHERINPATHWAY                                           | 32  | 0.74233854 | 0.30300635 | 0.9679316  | 0.4973638   | 1 | 2266 | tags=31%, list=22%, signal=40%  |
| REACTOME_SIGNALING_BY_INSULIN_RECEPTOR                         | 84  | 0.7432774  | 0.24441256 | 0.96346325 | 0.48969072  | 1 | 2881 | tags=37%, list=28%, signal=51%  |
| REACTOME_ANTIGEN_PRESENTATION_FOLDING_ASSEMBLY_AND_PEPTIDE_LOA | 19  | 0.7445462  | 0.39709613 | 0.96024287 | 0.518591    | 1 | 2760 | tags=53%, list=27%, signal=71%  |
| PID_CD42_REG_PATHWAY                                           | 23  | 0.74474525 | 0.3359954  | 0.9640271  | 0.4943182   | 1 | 3081 | tags=43%, list=30%, signal=62%  |
| REACTOME_SIGNALING_BY_EGFR_IN_CANCER                           | 88  | 0.74905497 | 0.23445822 | 0.9566969  | 0.53723407  | 1 | 1869 | tags=24%, list=18%, signal=29%  |
| REACTOME_ANTIGEN_PROCESSING_CROSS_PRESENTATION                 | 66  | 0.75012237 | 0.351146   | 0.9548724  | 0.53497165  | 1 | 1800 | tags=29%, list=17%, signal=35%  |
| REACTOME_POST_NMDA_RECEPTOR_ACTIVATION_EVENTS                  | 27  | 0.7524733  | 0.291854   | 0.95236933 | 0.5391791   | 1 | 2281 | tags=26%, list=22%, signal=33%  |
| REACTOME_CELL_CELL_JUNCTION_ORGANIZATION                       | 45  | 0.75404793 | 0.27078316 | 0.94768023 | 0.5344538   | 1 | 1197 | tags=13%, list=11%, signal=15%  |
| PID_NOTCH_PATHWAY                                              | 49  | 0.7563331  | 0.26054302 | 0.9477843  | 0.5254237   | 1 | 3225 | tags=41%, list=23%, signal=53%  |
| PID_REG_GR_PATHWAY                                             | 81  | 0.75843877 | 0.24059041 | 0.9480019  | 0.53457     | 1 | 2028 | tags=27%, list=19%, signal=33%  |
| PID_HDAC_CLASSI_PATHWAY                                        | 57  | 0.76253104 | 0.25299186 | 0.9418471  | 0.5397412   | 1 | 2451 | tags=33%, list=24%, signal=43%  |
| REACTOME_RECYCLING_PATHWAY_OF_L1                               | 24  | 0.7719672  | 0.30004677 | 0.93192786 | 0.55765593  | 1 | 1017 | tags=17%, list=10%, signal=18%  |
| SIG_INSULIN_RECEPTOR_PATHWAY_IN_CARDIAC_MYOCYTES               | 48  | 0.7734897  | 0.25686187 | 0.93247235 | 0.5631769   | 1 | 2020 | tags=23%, list=19%, signal=28%  |
| REACTOME_SIGNALING_BY_HIPPO                                    | 16  | 0.7756752  | 0.3603243  | 0.9326494  | 0.54189944  | 1 | 1952 | tags=38%, list=19%, signal=46%  |
| PID_NEPHRIN_NEPH1_PATHWAY                                      | 30  | 0.7776866  | 0.27446365 | 0.9329449  | 0.55454546  | 1 | 420  | tags=13%, list=4%, signal=14%   |
| PID_SYNDACAN_2_PATHWAY                                         | 31  | 0.77953833 | 0.28645918 | 0.92551124 | 0.535461    | 1 | 808  | tags=16%, list=8%, signal=17%   |
| PID_P38_MK2PATHWAY                                             | 20  | 0.781291   | 0.30815217 | 0.92588985 | 0.55597013  | 1 | 2075 | tags=35%, list=20%, signal=44%  |
| KEGG_GLIOMA                                                    | 58  | 0.78424484 | 0.24143703 | 0.9217637  | 0.57363015  | 1 | 3077 | tags=41%, list=30%, signal=58%  |
| REACTOME_IRON_UPTAKE_AND_TRANSPORT                             | 27  | 0.78519994 | 0.30801824 | 0.9161795  | 0.55140185  | 1 | 1791 | tags=22%, list=17%, signal=27%  |
| PID_FASPATHWAY                                                 | 36  | 0.7872196  | 0.28952718 | 0.9189748  | 0.54884547  | 1 | 808  | tags=17%, list=8%, signal=18%   |
| REACTOME_LATENT_INFECTION_OF_HOMO_SAPIENS_WITH_MYCOBACTERIUM   | 24  | 0.78726864 | 0.3274122  | 0.9163768  | 0.54291046  | 1 | 1791 | tags=25%, list=17%, signal=30%  |
| PID_HDAC_CLASSII_PATHWAY                                       | 31  | 0.78829384 | 0.26396388 | 0.91717947 | 0.59562844  | 1 | 1788 | tags=26%, list=17%, signal=31%  |
| PID_S1P_S1P3_PATHWAY                                           | 25  | 0.79603416 | 0.3096512  | 0.90936136 | 0.55451125  | 1 | 2379 | tags=32%, list=23%, signal=41%  |
| REACTOME_SIGNALING_BY_FGFR_MUTANTS                             | 36  | 0.79985577 | 0.26717052 | 0.9061354  | 0.60231024  | 1 | 564  | tags=8%, list=5%, signal=9%     |
| PID_PDGFBRPATHWAY                                              | 114 | 0.8035931  | 0.23338224 | 0.90301794 | 0.6         | 1 | 2300 | tags=30%, list=22%, signal=38%  |
| KEGG_PANCREATIC_CANCER                                         | 70  | 0.8072041  | 0.23661192 | 0.8999346  | 0.6347518   | 1 | 2137 | tags=27%, list=21%, signal=34%  |
| REACTOME_SIGNALING_TO_RAS                                      | 24  | 0.808078   | 0.28476313 | 0.8982412  | 0.58845437  | 1 | 2255 | tags=38%, list=22%, signal=48%  |
| KEGG_ENDOMETRIAL_CANCER                                        | 50  | 0.8109268  | 0.23511077 | 0.8873077  | 0.63833636  | 1 | 420  | tags=8%, list=4%, signal=8%     |
| REACTOME_TRANSMEMBRANE_TRANSPORT_OF_SMALL_MOLECULES            | 323 | 0.8116993  | 0.19246796 | 0.8882175  | 0.69953054  | 1 | 2794 | tags=26%, list=27%, signal=34%  |
| REACTOME_PPARG_ACTIVATES_GENE_EXPRESSION                       | 70  | 0.8140947  | 0.25406635 | 0.88828367 | 0.5745856   | 1 | 1719 | tags=21%, list=17%, signal=25%  |
| REACTOME_SIGNALING_BY_NGF                                      | 187 | 0.81420237 | 0.1976035  | 0.8789282  | 0.70034844  | 1 | 2020 | tags=21%, list=19%, signal=26%  |
| BIOCARTA_PYK2_PATHWAY                                          | 22  | 0.8143584  | 0.27789527 | 0.8775469  | 0.646695007 | 1 | 2020 | tags=32%, list=19%, signal=39%  |
| PID_VEGFR1_2_PATHWAY                                           | 67  | 0.8144096  | 0.2459865  | 0.892271   | 0.5886525   | 1 | 2943 | tags=39%, list=28%, signal=54%  |
| REACTOME_ION_CHANNEL_TRANSPORT                                 | 51  | 0.814411   | 0.24720077 | 0.8828636  | 0.6151203   | 1 | 3998 | tags=49%, list=38%, signal=79%  |
| REACTOME_NETRIN1_SIGNALING                                     | 30  | 0.81533796 | 0.28566134 | 0.89031184 | 0.61202186  | 1 | 1909 | tags=23%, list=18%, signal=28%  |
| REACTOME_MITOCHONDRIAL_PROTEIN_IMPORT                          | 38  | 0.8155505  | 0.34813416 | 0.87561363 | 0.6147705   | 1 | 2049 | tags=29%, list=20%, signal=36%  |
| REACTOME_PKB_MEDIATED_EVENTS                                   | 21  | 0.81611544 | 0.29555857 | 0.8792101  | 0.61382115  | 1 | 2881 | tags=48%, list=28%, signal=66%  |
| REACTOME_AMINO_ACID_SYNTHESIS_AND_INTERCONVERSION_TRANSAMINAT  | 15  | 0.81628096 | 0.3265066  | 0.89266634 | 0.58601135  | 1 | 2371 | tags=33%, list=23%, signal=43%  |
| REACTOME_CELL_DEATH_SIGNALING_VIA_NRAE_NRF1_AND_NADE           | 49  | 0.8163097  | 0.2353736  | 0.88843805 | 0.6549165   | 1 | 2006 | tags=22%, list=19%, signal=28%  |
| KEGG_NEUROTROPHIN_SIGNALING_PATHWAY                            | 114 | 0.81679565 | 0.2048745  | 0.8829143  | 0.6694915   | 1 | 2266 | tags=25%, list=22%, signal=32%  |
| REACTOME_CTLA4_INHIBITORY_SIGNALING                            | 21  | 0.81691283 | 0.30188623 | 0.8801107  | 0.6159555   | 1 | 2959 | tags=38%, list=28%, signal=53%  |
| SA_CASPASE_CASCADE                                             | 18  | 0.81945413 | 0.33521935 | 0.8670959  | 0.62711865  | 1 | 258  | tags=11%, list=2%, signal=11%   |
| KEGG_PHOSPHATIDYLINOSITOL_SIGNALING_SYSTEM                     | 59  | 0.82086986 | 0.23273306 | 0.8688836  | 0.6861702   | 1 | 2398 | tags=29%, list=23%, signal=37%  |
| REACTOME_CYTOKINE_SIGNALING_IN_IMMUNE_SYSTEM                   | 224 | 0.82106036 | 0.23810458 | 0.8714116  | 0.5976231   | 1 | 2137 | tags=24%, list=21%, signal=29%  |
| REACTOME_TRANS_GOLGI_NETWORK_VESICLE_BUDDING                   | 48  | 0.82164705 | 0.25890774 | 0.8671886  | 0.63320464  | 1 | 3434 | tags=48%, list=33%, signal=71%  |
| REACTOME_PLATELET_SENSITIZATION_BY_LDL                         | 15  | 0.8227986  | 0.31232384 | 0.8639501  | 0.61877394  | 1 | 2054 | tags=33%, list=20%, signal=41%  |
| KEGG_LONG_TERM_DEPRESSION                                      | 62  | 0.8232144  | 0.22543378 | 0.8689279  | 0.6783831   | 1 | 2959 | tags=29%, list=28%, signal=40%  |
| PID_ERB2ERBB3PATHWAY                                           | 41  | 0.82828367 | 0.24157166 | 0.8595718  | 0.70075756  | 1 | 2266 | tags=34%, list=22%, signal=43%  |
| REACTOME_PYRUVATE_METABOLISM                                   | 16  | 0.82984465 | 0.32903108 | 0.85607576 | 0.6060606   | 1 | 1712 | tags=25%, list=16%, signal=30%  |
| KEGG_VASOPRESSIN_REGULATED_WATER_REABSORPTION                  | 40  | 0.8303611  | 0.24969915 | 0.8507241  | 0.70254403  | 1 | 2203 | tags=33%, list=21%, signal=41%  |
| REACTOME_METABOLISM_OF_AMINO_ACIDS_AND_DERIVATIVES             | 166 | 0.830364   | 0.22509289 | 0.8571438  | 0.6300885   | 1 | 1815 | tags=17%, list=17%, signal=21%  |
| REACTOME_BIOSYNTHESIS_OF_THE_N_GLYCAN_PRECURSOR_DOLICHOH_LIPID | 17  | 0.83164394 | 0.3334303  | 0.8460311  | 0.6443515   | 1 | 1782 | tags=35%, list=17%, signal=43%  |
| REACTOME_NOD1_2_SIGNALING_PATHWAY                              | 25  | 0.8319363  | 0.29703107 | 0.8536823  | 0.6494662   | 1 | 1816 | tags=28%, list=17%, signal=34%  |
| BIOCARTA_STRESS_PATHWAY                                        | 24  | 0.8319711  | 0.28288203 | 0.85118514 | 0.6760563   | 1 | 1378 | tags=21%, list=13%, signal=24%  |
| BIOCARTA_TGFB_PATHWAY                                          | 18  | 0.8330918  | 0.3285379  | 0.8465525  | 0.6419295   | 1 | 1784 | tags=22%, list=17%, signal=27%  |
| BIOCARTA_AT1R_PATHWAY                                          | 27  | 0.83418953 | 0.25485384 | 0.85129297 | 0.6732852   | 1 | 2085 | tags=30%, list=20%, signal=37%  |
| PID_AR_NONGENOMIC_PATHWAY                                      | 30  | 0.83548576 | 0.25366488 | 0.84655327 | 0.6772983   | 1 | 2020 | tags=33%, list=19%, signal=41%  |
| REACTOME_TRANSPORT_OF_VITAMINS_NUCLEOSIDES_AND_RELATED_MOLECUL | 24  | 0.83593607 | 0.26078534 | 0.8422869  | 0.6847826   | 1 | 2436 | tags=29%, list=23%, signal=38%  |
| PID_REELINPATHWAY                                              | 29  | 0.83735484 | 0.26288623 | 0.840207   | 0.68233085  | 1 | 1650 | tags=21%, list=16%, signal=25%  |
| PID_SMAPD2_3NUCLEARPATHWAY                                     | 73  | 0.8432349  | 0.21455282 | 0.82503843 | 0.7703436   | 1 | 2088 | tags=25%, list=20%, signal=31%  |
| BIOCARTA_GPCR_PATHWAY                                          | 29  | 0.84358907 | 0.25578827 | 0.82209253 | 0.71428573  | 1 | 1869 | tags=28%, list=18%, signal=34%  |
| REACTOME_DAG_AND_IP3_SIGNALING                                 | 25  | 0.84381765 | 0.27110645 | 0.8233027  | 0.70912546  | 1 | 3077 | tags=40%, list=30%, signal=57%  |
| BIOCARTA_CARM_ER_PATHWAY                                       | 27  | 0.8442996  | 0.27290013 | 0.8351601  | 0.6479401   | 1 | 689  | tags=15%, list=7%, signal=16%   |
| PID_BMPPATHWAY                                                 | 33  | 0.84444124 | 0.26904854 | 0.82973075 | 0.69114876  | 1 | 2502 | tags=39%, list=24%, signal=52%  |
| REACTOME_SYNTHESIS_OF_PIP2_AT_THE_PLASMA_MEMBRANE              | 23  | 0.8448186  | 0.29454243 | 0.8308434  | 0.6629002   | 1 | 2137 | tags=30%, list=21%, signal=38%  |
| REACTOME_ACTIVATION_OF_NMDA_RECEPTOR_UPON_Glutamate_BINDING    | 31  | 0.84504634 | 0.24845402 | 0.8253461  | 0.7211009   | 1 | 2281 | tags=23%, list=22%, signal=29%  |
| REACTOME_NEPHRIN_INTERACTIONS                                  | 17  | 0.84510696 | 0.30200845 | 0.8199445  | 0.70610684  | 1 | 1203 | tags=18%, list=12%, signal=20%  |
| PID_INTEGRIN_A4B1_PATHWAY                                      | 29  | 0.8458725  | 0.27478042 | 0.8315551  | 0.6761905   | 1 | 1909 | tags=28%, list=18%, signal=34%  |
| KEGG_ENDOCYTOSIS                                               | 142 | 0.84652364 | 0.1890844  | 0.8258276  | 0.82470787  | 1 | 2099 | tags=23%, list=20%, signal=29%  |
| REACTOME_NA_CL_DEPENDENT_NEUROTRANSMITTER_TRANSPORTERS         | 15  | 0.8467136  | 0.3057155  | 0.81641537 | 0.69926196  | 1 | 4860 | tags=73%, list=47%, signal=137% |
| REACTOME_PLC_BETA_MEDIATED_EVENTS                              | 35  | 0.84716344 | 0.2490875  | 0.826866   | 0.71090907  | 1 | 2650 | tags=34%, list=25%, signal=46%  |
| KEGG_INSULIN_SIGNALING_PATHWAY                                 | 120 | 0.84810275 | 0.20175338 | 0.8169675  | 0.70961887  | 1 | 1694 | tags=17%, list=16%, signal=20%  |
| PID_NFKAPPABCANONICALPATHWAY                                   | 22  | 0.84817046 | 0.29932374 | 0.8316188  | 0.65162456  | 1 | 2382 | tags=32%, list=23%, signal=41%  |
| BIOCARTA_ARF_PATHWAY                                           | 16  | 0.8518282  | 0.29214635 | 0.812141   | 0.6986817   | 1 | 3496 | tags=50%, list=34%, signal=75%  |
| REACTOME_RNA_POL_III_TRANSCRIPTION_TERMINATION                 | 15  | 0.8527627  | 0.3183491  | 0.81028795 | 0.6955684   | 1 | 1853 | tags=33%, list=18%, signal=40%  |
| REACTOME_PYRUVATE_METABOLISM_AND_CITRIC_ACID_TCA_CYCLE         | 34  | 0.8536469  | 0.28455803 | 0.80840355 | 0.62068963  | 1 | 3781 | tags=50%, list=36%, signal=78%  |

|                                                                |     |            |            |            |            |   |      |                                  |
|----------------------------------------------------------------|-----|------------|------------|------------|------------|---|------|----------------------------------|
| REACTOME SIGNALING BY NOTCH                                    | 76  | 0.8577613  | 0.20214413 | 0.8019043  | 0.8318426  | 1 | 3249 | tags=41%, list=31%, signal=59%   |
| KEGG_FC_GAMMA_R_MEDIATED_PHAGOCYTOSIS                          | 75  | 0.85882074 | 0.21672735 | 0.79180175 | 0.7307692  | 1 | 2142 | tags=28%, list=21%, signal=35%   |
| KEGG_DRUG_METABOLISM_OTHER_ENZYMES                             | 31  | 0.85902727 | 0.24123463 | 0.7970657  | 0.7372014  | 1 | 1902 | tags=23%, list=18%, signal=28%   |
| PID_EPHBFWDPATHWAY                                             | 39  | 0.8595773  | 0.23944049 | 0.79536694 | 0.7571942  | 1 | 2255 | tags=26%, list=22%, signal=33%   |
| REACTOME_ION_TRANSPORT_BY_P_TYPE_ATPASES                       | 31  | 0.85993564 | 0.2480436  | 0.80196804 | 0.7311828  | 1 | 3071 | tags=35%, list=30%, signal=50%   |
| KEGG_NON_SMALL_CELL_LUNG_CANCER                                | 51  | 0.8600103  | 0.21502937 | 0.79788554 | 0.80144405 | 1 | 2990 | tags=39%, list=29%, signal=55%   |
| REACTOME_NEUROTRANSMITTER_RECEPTOR_BINDING_AND_DOWNSTREAM_T    | 116 | 0.8604033  | 0.18675753 | 0.7936117  | 0.7862969  | 1 | 3078 | tags=32%, list=30%, signal=45%   |
| ST_P38_MAPK_PATHWAY                                            | 33  | 0.86057675 | 0.23784351 | 0.8029335  | 0.7561437  | 1 | 2020 | tags=30%, list=19%, signal=37%   |
| BIOCARTA_FMLP_PATHWAY                                          | 32  | 0.8608759  | 0.23937525 | 0.7892049  | 0.77715355 | 1 | 2020 | tags=31%, list=19%, signal=39%   |
| KEGG_SMALL_CELL_LUNG_CANCER                                    | 81  | 0.8609025  | 0.20759414 | 0.79193264 | 0.8168761  | 1 | 1259 | tags=15%, list=12%, signal=17%   |
| REACTOME_APOPTOTIC_CLEAVAGE_OF_CELLULAR_PROTEINS               | 32  | 0.86190885 | 0.243937   | 0.7981542  | 0.7614679  | 1 | 3008 | tags=44%, list=29%, signal=61%   |
| REACTOME_AMYLOIDS                                              | 34  | 0.8673487  | 0.25156447 | 0.7826166  | 0.6939891  | 1 | 2077 | tags=29%, list=20%, signal=37%   |
| REACTOME_SIGNALING_BY_ROBO_RECEPTOR                            | 25  | 0.8687075  | 0.2466458  | 0.7832041  | 0.79501915 | 1 | 2512 | tags=32%, list=24%, signal=42%   |
| REACTOME_METABOLISM_OF_CARBOHYDRATES                           | 196 | 0.869379   | 0.18894184 | 0.7771059  | 0.82222223 | 1 | 1567 | tags=15%, list=15%, signal=18%   |
| KEGG_BIOSYNTHESIS_OF_UNSATURATED_FATTY_ACIDS                   | 18  | 0.8707975  | 0.2814244  | 0.7776562  | 0.7278106  | 1 | 3065 | tags=50%, list=29%, signal=71%   |
| REACTOME_METABOLISM_OF_MRNA                                    | 173 | 0.8710022  | 0.25338143 | 0.7746267  | 0.6731141  | 1 | 2180 | tags=32%, list=21%, signal=40%   |
| REACTOME_CELL_CELL_COMMUNICATION                               | 98  | 0.8716814  | 0.2073635  | 0.7784921  | 0.787307   | 1 | 1378 | tags=15%, list=13%, signal=17%   |
| REACTOME_OPIOID_SIGNALING                                      | 63  | 0.8782945  | 0.20021013 | 0.76132685 | 0.8263889  | 1 | 3077 | tags=37%, list=30%, signal=52%   |
| REACTOME_AMINO_ACID_TRANSPORT_ACROSS_THE_PLASMA_MEMBRANE       | 22  | 0.8783217  | 0.2503943  | 0.7582788  | 0.79888266 | 1 | 3820 | tags=50%, list=37%, signal=79%   |
| KEGG_HUNTINGTONS_DISEASE                                       | 147 | 0.8792135  | 0.23279735 | 0.76809555 | 0.6731141  | 1 | 2451 | tags=27%, list=24%, signal=34%   |
| REACTOME_SIGNAL_AMPLIFICATION                                  | 24  | 0.8792961  | 0.24086837 | 0.7591631  | 0.82363635 | 1 | 2280 | tags=33%, list=22%, signal=43%   |
| KEGG_ALANINE_ASPARTATE_AND_GLUTAMATE_METABOLISM                | 27  | 0.8796161  | 0.23036925 | 0.7634129  | 0.8106618  | 1 | 1920 | tags=22%, list=18%, signal=27%   |
| REACTOME_POST_CHAPERONIN_TUBULIN_FOLDING_PATHWAY               | 15  | 0.87967944 | 0.30859756 | 0.76184046 | 0.7013233  | 1 | 3153 | tags=47%, list=30%, signal=67%   |
| PID_IL1PATHWAY                                                 | 29  | 0.8797341  | 0.24768522 | 0.766327   | 0.7764505  | 1 | 726  | tags=14%, list=7%, signal=15%    |
| PID_P13KCAPATHWAY                                              | 39  | 0.88182306 | 0.2483783  | 0.7634423  | 0.739823   | 1 | 2646 | tags=31%, list=25%, signal=41%   |
| KEGG_INOSITOL_PHOSPHATE_METABOLISM                             | 40  | 0.8851689  | 0.21873315 | 0.7522316  | 0.8457249  | 1 | 2646 | tags=33%, list=20%, signal=43%   |
| REACTOME_SHC_RELATED_EVENTS                                    | 15  | 0.89222413 | 0.2605252  | 0.7443586  | 0.79477614 | 1 | 2255 | tags=33%, list=22%, signal=42%   |
| BIOCARTA_41BB_PATHWAY                                          | 16  | 0.89254236 | 0.26915297 | 0.7456024  | 0.80633146 | 1 | 2199 | tags=31%, list=21%, signal=40%   |
| KEGG_O_GLYCAN_BIOSYNTHESIS                                     | 18  | 0.89929235 | 0.26543957 | 0.7379467  | 0.7826923  | 1 | 3725 | tags=61%, list=36%, signal=95%   |
| REACTOME_YAP1_AND_WWTR1_TAZ_STIMULATED_GENE_EXPRESSION         | 20  | 0.9073158  | 0.26841727 | 0.73090273 | 0.79880476 | 1 | 611  | tags=15%, list=6%, signal=16%    |
| REACTOME_LYSOSOME_VESICLE_BIOGENESIS                           | 21  | 0.9158724  | 0.25545067 | 0.7231212  | 0.8330134  | 1 | 3434 | tags=52%, list=33%, signal=78%   |
| KEGG_MELANOGENESIS                                             | 83  | 0.919698   | 0.17066115 | 0.6867682  | 0.9498328  | 1 | 2676 | tags=25%, list=26%, signal=34%   |
| PID_IL2_1PATHWAY                                               | 52  | 0.9202691  | 0.20020528 | 0.6844745  | 0.8842105  | 1 | 2266 | tags=29%, list=22%, signal=37%   |
| BIOCARTA_NFAT_PATHWAY                                          | 49  | 0.9217113  | 0.1957668  | 0.68695253 | 0.8926554  | 1 | 2020 | tags=20%, list=19%, signal=25%   |
| PID_HIF2PATHWAY                                                | 30  | 0.92218584 | 0.2123043  | 0.6790675  | 0.8976661  | 1 | 2451 | tags=33%, list=24%, signal=43%   |
| REACTOME_SIGNALING_BY_NOTCH1                                   | 51  | 0.9233177  | 0.18307249 | 0.69125295 | 0.95194083 | 1 | 3249 | tags=39%, list=31%, signal=57%   |
| REACTOME_GABA_SYNTHESIS_RELEASE_REUPTAKE_AND_DEGRADATION       | 15  | 0.9238296  | 0.2718726  | 0.68704015 | 0.81037927 | 1 | 3446 | tags=53%, list=33%, signal=80%   |
| REACTOME_CIRCADIAN_CLOCK                                       | 43  | 0.92412096 | 0.21144542 | 0.6793141  | 0.9032258  | 1 | 611  | tags=12%, list=6%, signal=12%    |
| PID_TAP63PATHWAY                                               | 49  | 0.92553794 | 0.19638288 | 0.6912744  | 0.9081272  | 1 | 2451 | tags=27%, list=24%, signal=35%   |
| REACTOME_CD28_CO_STIMULATION                                   | 27  | 0.92580813 | 0.23235798 | 0.6872681  | 0.8542435  | 1 | 2137 | tags=26%, list=21%, signal=33%   |
| PID_NFKAPPATYPICALPATHWAY                                      | 15  | 0.9268547  | 0.26178363 | 0.7117087  | 0.81835204 | 1 | 2003 | tags=27%, list=19%, signal=33%   |
| KEGG_GAP_JUNCTION                                              | 74  | 0.92730504 | 0.18662882 | 0.71310246 | 0.9001664  | 1 | 3048 | tags=35%, list=29%, signal=49%   |
| REACTOME_O_LINKED_GLYCOSYLATION_OF_MUCINS                      | 29  | 0.92749894 | 0.21959892 | 0.691525   | 0.84036696 | 1 | 3725 | tags=48%, list=36%, signal=75%   |
| ST_ADRENERGIC                                                  | 34  | 0.92753315 | 0.20786141 | 0.6723608  | 0.8985765  | 1 | 2020 | tags=21%, list=19%, signal=25%   |
| BIOCARTA_P38MAPK_PATHWAY                                       | 37  | 0.92783755 | 0.19753112 | 0.6931882  | 0.9172535  | 1 | 2396 | tags=30%, list=23%, signal=38%   |
| REACTOME_CITRIC_ACID_CYCLE_TCA_CYCLE                           | 17  | 0.930012   | 0.28596646 | 0.69325876 | 0.76039606 | 1 | 3781 | tags=53%, list=36%, signal=83%   |
| BIOCARTA_AGR_PATHWAY                                           | 32  | 0.93061644 | 0.2195969  | 0.6945819  | 0.85607475 | 1 | 2216 | tags=28%, list=21%, signal=36%   |
| KEGG_GLYCOSPHINGOLIPID_BIOSYNTHESIS_LACTO_AND_NEOLACTO_SERIES  | 23  | 0.93140745 | 0.2408251  | 0.6958055  | 0.86764705 | 1 | 1638 | tags=17%, list=16%, signal=21%   |
| KEGG_TGF_BETA_SIGNALING_PATHWAY                                | 76  | 0.93224996 | 0.20425308 | 0.7041567  | 0.85294116 | 1 | 2502 | tags=29%, list=24%, signal=38%   |
| BIOCARTA_EDG1_PATHWAY                                          | 24  | 0.93285406 | 0.22899102 | 0.6965365  | 0.8465804  | 1 | 2020 | tags=29%, list=19%, signal=36%   |
| REACTOME_REGULATION_OF_HYPOXIA_INDUCIBLE_FACTOR_HIF_BY_OXYGEN  | 22  | 0.93308413 | 0.2348465  | 0.6982479  | 0.877551   | 1 | 2451 | tags=32%, list=24%, signal=42%   |
| REACTOME_THROMBIN_SIGNALING_THROUGH_PROTEINASE_ACTIVATED_REC   | 26  | 0.93325406 | 0.20856243 | 0.6648727  | 0.90413535 | 1 | 2280 | tags=27%, list=24%, signal=34%   |
| REACTOME_L1CAM_INTERACTIONS                                    | 77  | 0.93386364 | 0.18884148 | 0.70122993 | 0.90636045 | 1 | 2634 | tags=27%, list=25%, signal=36%   |
| ST_DIFFERENTIATION_PATHWAY_IN_PC12_CELLS                       | 41  | 0.93418956 | 0.21011631 | 0.704413   | 0.870438   | 1 | 1650 | tags=20%, list=16%, signal=23%   |
| REACTOME_POST_TRANSLATIONAL_MODIFICATION_SYNTHESIS_OF_GPI_ANCH | 21  | 0.9343719  | 0.24789903 | 0.6990494  | 0.8467742  | 1 | 2623 | tags=38%, list=25%, signal=51%   |
| BIOCARTA_VEGF_PATHWAY                                          | 27  | 0.93837595 | 0.21348067 | 0.6577987  | 0.89807695 | 1 | 2783 | tags=37%, list=27%, signal=50%   |
| REACTOME_OLFACTORY_SIGNALING_PATHWAY                           | 27  | 0.94029725 | 0.22714666 | 0.65383106 | 0.8201835  | 1 | 1788 | tags=11%, list=17%, signal=13%   |
| KEGG_PENTOSE_PHOSPHATE_PATHWAY                                 | 21  | 0.9409768  | 0.22395694 | 0.6440631  | 0.91369605 | 1 | 625  | tags=10%, list=6%, signal=10%    |
| KEGG_SYSTEMIC_LUPUS_ERYTHEMATOSUS                              | 64  | 0.9420931  | 0.12121569 | 0.6451983  | 0.83154124 | 1 | 2362 | tags=33%, list=23%, signal=42%   |
| REACTOME_BMAL1_CLOCK_NPAS2_ACTIVATES_CIRCADIAN_EXPRESSION      | 30  | 0.9441275  | 0.22362387 | 0.6453541  | 0.90804595 | 1 | 611  | tags=13%, list=6%, signal=14%    |
| PID_SYNDICAN_3_PATHWAY                                         | 16  | 0.94495654 | 0.22764266 | 0.64685106 | 0.91312385 | 1 | 3531 | tags=50%, list=34%, signal=76%   |
| REACTOME_TRANSMISSION_ACROSS_CHEMICAL_SYNAPSES                 | 163 | 0.94509387 | 0.14605778 | 0.6326516  | 0.98867315 | 1 | 3078 | tags=30%, list=30%, signal=42%   |
| REACTOME_SIGNALING_BY_CONSTITUTIVELY_ACTIVE_EGFR               | 16  | 0.9472605  | 0.21849562 | 0.63267136 | 0.9266055  | 1 | 2828 | tags=38%, list=27%, signal=51%   |
| PID_RET_PATHWAY                                                | 35  | 0.9483821  | 0.1870134  | 0.63384277 | 0.96037734 | 1 | 3183 | tags=37%, list=31%, signal=53%   |
| BIOCARTA_MTOR_PATHWAY                                          | 21  | 0.95193565 | 0.2088418  | 0.6220029  | 0.92621356 | 1 | 2886 | tags=33%, list=28%, signal=46%   |
| REACTOME_DOWNSTREAM_TCR_SIGNALING                              | 27  | 0.9572215  | 0.21942073 | 0.61268866 | 0.90909094 | 1 | 1816 | tags=22%, list=17%, signal=27%   |
| KEGG_GLYCOSYLPHOSPHATIDYLINOSITOL_GPI_ANCHOR_BIOSYNTHESIS      | 19  | 0.9642563  | 0.212694   | 0.58788013 | 0.9509202  | 1 | 2623 | tags=37%, list=25%, signal=49%   |
| ST_WNT_CA2_CYCLIC_GMP_PATHWAY                                  | 19  | 0.96433336 | 0.19446497 | 0.59087175 | 0.95614034 | 1 | 3645 | tags=42%, list=35%, signal=65%   |
| REACTOME_CA_DEPENDENT_EVENTS                                   | 23  | 0.9651577  | 0.19928041 | 0.5928547  | 0.9649123  | 1 | 3077 | tags=35%, list=30%, signal=49%   |
| REACTOME_AMINE_COMPOUND_SLC_TRANSPORTERS                       | 21  | 0.9655644  | 0.19830573 | 0.5954043  | 0.9309091  | 1 | 8348 | tags=100%, list=80%, signal=504% |
| PID_IL2_P13KPATHWAY                                            | 30  | 0.9659084  | 0.17305513 | 0.5817594  | 0.9669565  | 1 | 3341 | tags=40%, list=32%, signal=59%   |
| BIOCARTA_IGF1R_PATHWAY                                         | 21  | 0.9663732  | 0.19188032 | 0.597362   | 0.95063984 | 1 | 3048 | tags=38%, list=29%, signal=54%   |
| KEGG_GLUTATHIONE_METABOLISM                                    | 35  | 0.9686402  | 0.18667205 | 0.5734638  | 0.9411765  | 1 | 1864 | tags=17%, list=18%, signal=21%   |
| KEGG_FRUCTOSE_AND_MANNOSE_METABOLISM                           | 27  | 0.9711653  | 0.17999338 | 0.5617665  | 0.96750903 | 1 | 2681 | tags=26%, list=26%, signal=35%   |
| REACTOME_TCR_SIGNALING                                         | 42  | 0.9716053  | 0.1987344  | 0.564803   | 0.91791046 | 1 | 1816 | tags=19%, list=17%, signal=23%   |
| KEGG_OXIDATIVE_PHOSPHORYLATION                                 | 97  | 0.98050606 | 0.19584201 | 0.53821486 | 0.8549618  | 1 | 3107 | tags=32%, list=30%, signal=45%   |
| BIOCARTA_ACH_PATHWAY                                           | 16  | 0.9923041  | 0.18026589 | 0.5009335  | 0.9828897  | 1 | 1259 | tags=13%, list=12%, signal=14%   |
| REACTOME_PEROXISOMAL_LIPID_METABOLISM                          | 17  | 0.9930348  | 0.17549771 | 0.4744478  | 0.98547715 | 1 | 2421 | tags=24%, list=23%, signal=31%   |
| KEGG_GLYCOLYSIS_GLUconeogenesis                                | 52  | 0.9933355  | 0.13871886 | 0.4507871  | 0.9925926  | 1 | 1704 | tags=12%, list=16%, signal=14%   |
| KEGG_CITRATE_CYCLE_TCA_CYCLE                                   | 28  | 0.9941214  | 0.17432939 | 0.4586694  | 0.9841584  | 1 | 3781 | tags=46%, list=36%, signal=73%   |
| KEGG_PARKINSONS_DISEASE                                        | 94  | 0.9942193  | 0.17506593 | 0.478785   | 0.92885375 | 1 | 2326 | tags=21%, list=22%, signal=27%   |
| BIOCARTA_CSK_PATHWAY                                           | 20  | 0.9959577  | 0.19375752 | 0.4806793  | 0.9576923  | 1 | 1788 | tags=20%, list=17%, signal=24%   |
| REACTOME_TRAF6_MEDIATED_IRF7_ACTIVATION                        | 21  | 0.99668294 | 0.14391594 | 0.38640073 | 1          | 1 | 8913 | tags=100%, list=86%, signal=694% |
| REACTOME_TCA_CYCLE_AND_RESPIRATORY_ELECTRON_TRANSPORT          | 101 | 0.9983567  | 0.1468311  | 0.39302692 | 0.9814433  | 1 | 2426 | tags=21%, list=23%, signal=27%   |

Pathways negatively enriched with TRIM24

| NAME                                             | SIZE | FDR q-val  | ES         | NES        | NOM p-val  | FWER p-val | RANK AT MAX | LEADING EDGE                   |
|--------------------------------------------------|------|------------|------------|------------|------------|------------|-------------|--------------------------------|
| REACTOME_DEGRADATION_OF_THE_EXTRACELLULAR_MATRIX | 24   | 0.5413832  | -0.47106   | -1.3795844 | 0.12931034 | 1          | 2824        | tags=46%, list=27%, signal=63% |
| REACTOME_INTEGRIN_CELL_SURFACE_INTERACTIONS      | 71   | 0.54274887 | -0.3951375 | -1.3857902 | 0.09782609 | 1          | 3445        | tags=54%, list=33%, signal=79% |
| PID_IL12_2PATHWAY                                | 52   | 0.54398227 | -0.4631345 | -1.3474586 | 0.19139785 | 1          | 3068        | tags=58%, list=29%, signal=81% |
| KEGG_GRAFT_VERSUS_HOST_DISEASE                   | 28   | 0.5442168  | -0.5825915 | -1.3434771 | 0.21581197 | 1          | 2803        | tags=61%, list=27%, signal=83% |
| REACTOME_PI_3K_CASCADE                           | 44   | 0.5447181  | -0.3627366 | -1.3281429 | 0.1313364  | 1          | 1881        | tags=32%, list=18%, signal=39% |

|                                                                 |     |            |            |            |            |       |      |                                 |
|-----------------------------------------------------------------|-----|------------|------------|------------|------------|-------|------|---------------------------------|
| PID_IL6_7PATHWAY                                                | 46  | 0.54481316 | -0.3922673 | -1.3804728 | 0.10022779 | 1     | 2392 | tags=41%, list=23%, signal=53%  |
| KEGG_FOCAL_ADHESION                                             | 181 | 0.5448903  | -0.3576089 | -1.376039  | 0.1012931  | 1     | 2342 | tags=38%, list=22%, signal=48%  |
| REACTOME_NONSENSE_MEDIATED_DECAY_ENHANCED_BY_THE_EXON_JUNCTI    | 85  | 0.5451386  | -0.521822  | -1.3259408 | 0.22970296 | 1     | 2327 | tags=62%, list=22%, signal=80%  |
| PID_IL23PATHWAY                                                 | 34  | 0.5466097  | -0.4817137 | -1.3981049 | 0.15       | 1     | 3214 | tags=59%, list=31%, signal=85%  |
| BIOCARTA_INTRINSIC_PATHWAY                                      | 23  | 0.5475395  | -0.5318563 | -1.3862233 | 0.13714285 | 1     | 4331 | tags=83%, list=42%, signal=141% |
| REACTOME_MYD88_MAL_CASCADE_INITIATED_ON_PLASMA_MEMBRANE         | 70  | 0.5478431  | -0.3426902 | -1.3478816 | 0.07925408 | 1     | 2484 | tags=46%, list=24%, signal=60%  |
| KEGG_ALLOGRAFT_REJECTION                                        | 30  | 0.54850805 | -0.5728015 | -1.3436906 | 0.21518987 | 1     | 2803 | tags=63%, list=27%, signal=86%  |
| BIOCARTA_RELA_PATHWAY                                           | 16  | 0.5486015  | -0.4965825 | -1.3997442 | 0.10307018 | 1     | 1561 | tags=38%, list=15%, signal=44%  |
| PID_UPA_UPAR_PATHWAY                                            | 36  | 0.5486926  | -0.4674975 | -1.3680899 | 0.15486726 | 1     | 1701 | tags=33%, list=16%, signal=40%  |
| KEGG_MAPK_SIGNALING_PATHWAY                                     | 231 | 0.5487866  | -0.2852776 | -1.3513218 | 0.03562341 | 1     | 2719 | tags=38%, list=26%, signal=50%  |
| REACTOME_MUSCLE_CONTRACTION                                     | 40  | 0.54913896 | -0.5335651 | -1.3281718 | 0.18435754 | 1     | 1830 | tags=33%, list=18%, signal=39%  |
| KEGG_PROXIMAL_TUBULE_BICARBONATE_RECLAMATION                    | 22  | 0.54966676 | -0.4373413 | -1.3530182 | 0.11451943 | 1     | 1550 | tags=23%, list=15%, signal=27%  |
| KEGG_LEISHMANIA_INFECTION                                       | 56  | 0.54981273 | -0.4453575 | -1.3808247 | 0.13140312 | 1     | 2657 | tags=50%, list=26%, signal=67%  |
| KEGG_LEUKOCYTE_TRANSENDOTHELIAL_MIGRATION                       | 96  | 0.5498968  | -0.3552728 | -1.3875262 | 0.09172259 | 1     | 1951 | tags=27%, list=19%, signal=33%  |
| BIOCARTA_GH_PATHWAY                                             | 25  | 0.54998296 | -0.4379341 | -1.4186316 | 0.06852248 | 1     | 2221 | tags=40%, list=21%, signal=51%  |
| BIOCARTA_TPO_PATHWAY                                            | 22  | 0.5502259  | -0.4289018 | -1.33919   | 0.10792951 | 1     | 2144 | tags=41%, list=21%, signal=51%  |
| REACTOME_GASTRIN_CREB_SIGNALING_PATHWAY_VIA_PKC_AND_MAPK        | 149 | 0.55044097 | -0.3089211 | -1.3696171 | 0.06435644 | 1     | 3059 | tags=39%, list=29%, signal=54%  |
| KEGG_HISTIDINE_METABOLISM                                       | 23  | 0.5505763  | -0.4183343 | -1.360944  | 0.12307692 | 1     | 765  | tags=22%, list=7%, signal=23%   |
| BIOCARTA_NKT_PATHWAY                                            | 25  | 0.5506223  | -0.5161297 | -1.3588872 | 0.17067833 | 1     | 3496 | tags=68%, list=34%, signal=102% |
| REACTOME_INFLUENZA_VIRAL_RNA_TRANSCRIPTION_AND_REPLICATION      | 80  | 0.5514724  | -0.5751105 | -1.3891852 | 0.19455253 | 1     | 2563 | tags=70%, list=25%, signal=92%  |
| REACTOME_AMINE_LIGAND_BINDING_RECEPTORS                         | 29  | 0.5515679  | -0.3985108 | -1.3308388 | 0.140553   | 1     | 2596 | tags=38%, list=25%, signal=50%  |
| REACTOME_ABC_FAMILY_PROTEINS_MEDIATED_TRANSPORT                 | 27  | 0.55188644 | -0.4320199 | -1.3712354 | 0.11410788 | 1     | 1567 | tags=30%, list=15%, signal=35%  |
| PID_API_PATHWAY                                                 | 67  | 0.5521015  | -0.3861115 | -1.4204513 | 0.07991361 | 1     | 2429 | tags=43%, list=23%, signal=56%  |
| KEGG_JAK_STAT_SIGNALING_PATHWAY                                 | 125 | 0.5522662  | -0.3533781 | -1.3624285 | 0.11709602 | 1     | 2833 | tags=40%, list=27%, signal=54%  |
| REACTOME_G_ALPHA_I_SIGNALING_EVENTS                             | 137 | 0.55226946 | -0.3079435 | -1.348118  | 0.06951872 | 1     | 3120 | tags=34%, list=30%, signal=47%  |
| BIOCARTA_AMI_PATHWAY                                            | 19  | 0.5529984  | -0.5393724 | -1.3930635 | 0.12352941 | 1     | 4715 | tags=95%, list=45%, signal=173% |
| REACTOME_TOLL_RECEPTOR_CASCADES                                 | 98  | 0.5533573  | -0.3329839 | -1.3282994 | 0.10663507 | 1     | 2395 | tags=42%, list=23%, signal=54%  |
| REACTOME_SEMA4D_INDUCED_CELL_MIGRATION_AND_GROWTH_CONE_COLL     | 22  | 0.5539334  | -0.4541134 | -1.4000982 | 0.09713025 | 1     | 2151 | tags=45%, list=21%, signal=57%  |
| BIOCARTA_NKCELLS_PATHWAY                                        | 17  | 0.5543452  | -0.5005877 | -1.3531905 | 0.16313559 | 1     | 2515 | tags=41%, list=24%, signal=54%  |
| KEGG_VIRAL_MYOCARDITIS                                          | 62  | 0.5544137  | -0.4193776 | -1.3334777 | 0.1751663  | 1     | 2700 | tags=48%, list=26%, signal=65%  |
| REACTOME_BIOLOGICAL_OXIDATIONS                                  | 97  | 0.5544244  | -0.3286408 | -1.36382   | 0.09       | 1     | 2316 | tags=27%, list=22%, signal=34%  |
| KEGG_SNARE_INTERACTIONS_IN_VESICULAR_TRANSPORT                  | 29  | 0.5545952  | -0.4180006 | -1.3315034 | 0.13174947 | 1     | 1579 | tags=38%, list=15%, signal=45%  |
| PID_HEDGEHOG_2PATHWAY                                           | 18  | 0.5548024  | -0.4597193 | -1.4069393 | 0.0831643  | 1     | 898  | tags=28%, list=9%, signal=30%   |
| REACTOME_NFKB_AND_MAP_KINASES_ACTIVATION_MEDIATED_BY_TLR4_SIGN  | 62  | 0.5551869  | -0.3705973 | -1.4219395 | 0.05069124 | 1     | 2335 | tags=45%, list=22%, signal=58%  |
| KEGG_ADIPOCYTOKINE_SIGNALING_PATHWAY                            | 62  | 0.5560066  | -0.3793101 | -1.4113783 | 0.10792951 | 1     | 2335 | tags=39%, list=22%, signal=50%  |
| KEGG_BETA_ALANINE_METABOLISM                                    | 21  | 0.5563544  | -0.4787569 | -1.3895634 | 0.14078675 | 1     | 3841 | tags=71%, list=37%, signal=113% |
| REACTOME_INNATE_IMMUNE_SYSTEM                                   | 196 | 0.557482   | -0.3118425 | -1.3060735 | 0.12864077 | 1     | 2395 | tags=36%, list=23%, signal=46%  |
| KEGG_FATTY_ACID_METABOLISM                                      | 35  | 0.55851203 | -0.5131069 | -1.4233425 | 0.12474849 | 1     | 2669 | tags=51%, list=26%, signal=69%  |
| REACTOME_TRIF_MEDIATED_TLR3_SIGNALING                           | 64  | 0.5587446  | -0.3407099 | -1.3337325 | 0.0952381  | 1     | 2335 | tags=42%, list=22%, signal=54%  |
| PID_FRA_PATHWAY                                                 | 35  | 0.5588242  | -0.4208154 | -1.353474  | 0.13555555 | 1     | 3300 | tags=71%, list=32%, signal=104% |
| PID_P38_MKK3_6PATHWAY                                           | 21  | 0.558928   | -0.4133252 | -1.3145753 | 0.13665944 | 1     | 2660 | tags=52%, list=26%, signal=70%  |
| BIOCARTA_AKT_PATHWAY                                            | 22  | 0.5596374  | -0.4096229 | -1.3087438 | 0.11827957 | 1     | 2335 | tags=45%, list=22%, signal=58%  |
| REACTOME_INFLAMMASOMES                                          | 15  | 0.5598382  | -0.4716483 | -1.3159589 | 0.16742082 | 1     | 1617 | tags=40%, list=16%, signal=47%  |
| BIOCARTA_DC_PATHWAY                                             | 20  | 0.5602223  | -0.5327807 | -1.4001839 | 0.1637931  | 1     | 3496 | tags=75%, list=34%, signal=113% |
| REACTOME_CELL_SURFACE_INTERACTIONS_AT_THE_VASCULAR_WALL         | 77  | 0.56022334 | -0.3541082 | -1.2979479 | 0.14622642 | 1     | 3116 | tags=47%, list=30%, signal=66%  |
| REACTOME_FORMATION_OF_THE_TERNARY_COMPLEX_AND_SUBSEQUENTLY      | 32  | 0.5606247  | -0.5982679 | -1.3065282 | 0.24448898 | 1     | 2731 | tags=78%, list=26%, signal=106% |
| REACTOME_SEMA4D_IN_SEMAPHORIN_SIGNALING                         | 26  | 0.56084365 | -0.4445502 | -1.407225  | 0.0945946  | 1     | 2151 | tags=42%, list=21%, signal=53%  |
| REACTOME_G_BETA_GAMMA_SIGNALING_THROUGH_PI3KGAMMA               | 19  | 0.56126976 | -0.4082676 | -1.3028827 | 0.13755459 | 1     | 2125 | tags=37%, list=20%, signal=46%  |
| PID_ANGIOPHOTENINRECEPTOR_PATHWAY                               | 49  | 0.56132096 | -0.4274142 | -1.4251705 | 0.06034483 | 1     | 1951 | tags=39%, list=19%, signal=47%  |
| PID_HDAC_CLASSIII_PATHWAY                                       | 22  | 0.561665   | -0.4119218 | -1.2988592 | 0.14376321 | 1     | 2665 | tags=41%, list=26%, signal=55%  |
| PID_INTEGRINS_PATHWAY                                           | 17  | 0.56227285 | -0.4978767 | -1.3169023 | 0.20416667 | 1     | 3203 | tags=47%, list=31%, signal=68%  |
| KEGG_GLYCOSAMINOGLYCAN_DEGRADATION                              | 20  | 0.5624958  | -0.4884139 | -1.4115957 | 0.1025641  | 1     | 1522 | tags=30%, list=15%, signal=35%  |
| REACTOME_FR52_MEDIATED_CASCADE                                  | 30  | 0.5627549  | -0.3901206 | -1.4016398 | 0.07894737 | 1     | 1495 | tags=30%, list=14%, signal=35%  |
| KEGG_ACUTE_MYELOID_LEUKEMIA                                     | 55  | 0.5628268  | -0.337231  | -1.3092602 | 0.11694511 | 1     | 1561 | tags=31%, list=15%, signal=36%  |
| REACTOME_GROWTH_HORMONE_RECEPTOR_SIGNALING                      | 23  | 0.56527627 | -0.4176337 | -1.2994134 | 0.16705883 | 1     | 2833 | tags=48%, list=27%, signal=66%  |
| REACTOME_SYNTHESIS_OF_PA                                        | 19  | 0.5654071  | -0.4401053 | -1.3100755 | 0.14828898 | 1     | 1256 | tags=26%, list=12%, signal=30%  |
| REACTOME_SIGNALING_BY_GPCR                                      | 469 | 0.5673782  | -0.2909248 | -1.4308473 | 0.02702703 | 1     | 2892 | tags=32%, list=28%, signal=43%  |
| KEGG_TYROSINE_METABOLISM                                        | 36  | 0.56872755 | -0.4395447 | -1.4252453 | 0.09706546 | 1     | 2669 | tags=42%, list=26%, signal=56%  |
| KEGG_AXON_GUIDANCE                                              | 108 | 0.5687931  | -0.3222247 | -1.2924944 | 0.11724138 | 1     | 1740 | tags=24%, list=17%, signal=29%  |
| REACTOME_SRP_DEPENDENT_COTRANSLATIONAL_PROTEIN_TARGETING_TO_M   | 86  | 0.5689007  | -0.5161368 | -1.2782149 | 0.27559054 | 1     | 2563 | tags=63%, list=25%, signal=83%  |
| REACTOME_PLATELET_ACTIVATION_SIGNALING_AND_AGGREGATION          | 174 | 0.5701685  | -0.3049593 | -1.2743205 | 0.13493976 | 1     | 2437 | tags=34%, list=23%, signal=44%  |
| PID_AVB3_INTEGRIN_PATHWAY                                       | 7   | 0.5714556  | -0.3948417 | -1.2841309 | 0.21336207 | 1     | 2655 | tags=41%, list=26%, signal=55%  |
| REACTOME_GLYCEROPHOSPHOLIPID_BIOSYNTHESIS                       | 51  | 0.5721078  | -0.3372282 | -1.2785323 | 0.13806707 | 1     | 1277 | tags=24%, list=12%, signal=27%  |
| PID_FCR1PATHWAY                                                 | 54  | 0.5734843  | -0.4026856 | -1.4262302 | 0.08783784 | 1     | 2397 | tags=44%, list=23%, signal=57%  |
| REACTOME_PLATELET_HOMEOSTASIS                                   | 66  | 0.5739444  | -0.3169637 | -1.2743887 | 0.12383178 | 1     | 2383 | tags=33%, list=23%, signal=43%  |
| REACTOME_TRANSCRIPTIONAL_REGULATION_OF_WHITE_ADIPOCYTE_DIFFEREN | 46  | 0.57463205 | -0.367571  | -1.2792177 | 0.17849462 | 1     | 2094 | tags=41%, list=20%, signal=51%  |
| REACTOME_SHC_MEDIATED_CASCADE                                   | 23  | 0.57501924 | -0.4190278 | -1.430986  | 0.07228915 | 1     | 1495 | tags=30%, list=14%, signal=35%  |
| PID_WNT_SIGNALING_PATHWAY                                       | 24  | 0.5750976  | -0.385771  | -1.284388  | 0.14505495 | 1     | 3555 | tags=50%, list=34%, signal=76%  |
| PID_IL27PATHWAY                                                 | 25  | 0.5754496  | -0.4613605 | -1.2807032 | 0.23516949 | 1     | 3046 | tags=48%, list=29%, signal=68%  |
| BIOCARTA_GLEEVAC_PATHWAY                                        | 21  | 0.5774662  | -0.4106264 | -1.2851479 | 0.16517857 | 1     | 759  | tags=24%, list=7%, signal=26%   |
| REACTOME_SEMAPHORIN_INTERACTIONS                                | 59  | 0.5775437  | -0.3944427 | -1.4447551 | 0.07399103 | 0.999 | 1775 | tags=34%, list=17%, signal=41%  |
| BIOCARTA_TH1TH2_PATHWAY                                         | 18  | 0.5783771  | -0.5468307 | -1.2866441 | 0.23554604 | 1     | 3496 | tags=78%, list=34%, signal=117% |
| REACTOME_NUCLEAR_RECEPTOR_TRANSCRIPTION_PATHWAY                 | 42  | 0.57871026 | -0.3956782 | -1.4326875 | 0.07572383 | 1     | 2297 | tags=33%, list=22%, signal=43%  |
| BIOCARTA_NTHI_PATHWAY                                           | 24  | 0.5814923  | -0.422787  | -1.267925  | 0.16630197 | 1     | 1574 | tags=33%, list=15%, signal=39%  |
| REACTOME_LIPID_DIGESTION_MOBILIZATION_AND_TRANSPORT             | 39  | 0.58248496 | -0.3932903 | -1.2658311 | 0.18789144 | 1     | 2678 | tags=41%, list=26%, signal=55%  |
| KEGG_DRUG_METABOLISM_CYTOCHROME_P450                            | 46  | 0.5826449  | -0.4192759 | -1.4340724 | 0.078125   | 1     | 3708 | tags=50%, list=36%, signal=77%  |
| BIOCARTA_LAIR_PATHWAY                                           | 17  | 0.5837818  | -0.5505374 | -1.4465105 | 0.11930586 | 0.999 | 2360 | tags=41%, list=23%, signal=53%  |
| KEGG_CELL_ADHESION_MOLECULES_CAMS                               | 112 | 0.58387303 | -0.4061198 | -1.4396907 | 0.10779817 | 1     | 3042 | tags=43%, list=29%, signal=60%  |
| REACTOME_ACTIVATED_TLR4_SIGNALING                               | 79  | 0.5880653  | -0.3617864 | -1.4351956 | 0.03381642 | 1     | 2484 | tags=47%, list=24%, signal=61%  |
| KEGG_SPHINGOLIPID_METABOLISM                                    | 26  | 0.589705   | -0.3816187 | -1.2612638 | 0.16500995 | 1     | 627  | tags=19%, list=6%, signal=20%   |
| REACTOME_3_UTR_MEDIATED_TRANSLATIONAL_REGULATION                | 75  | 0.59091544 | -0.6174952 | -1.446451  | 0.15277778 | 0.999 | 2563 | tags=73%, list=25%, signal=97%  |
| REACTOME_G_PROTEIN_BETA_GAMMA_SIGNALING                         | 22  | 0.5932904  | -0.3849448 | -1.2581729 | 0.16880342 | 1     | 2125 | tags=36%, list=20%, signal=46%  |
| BIOCARTA_IL10_PATHWAY                                           | 17  | 0.5956761  | -0.5394199 | -1.4477    | 0.12471655 | 0.999 | 3185 | tags=59%, list=31%, signal=85%  |
| KEGG_ABC_TRANSPORTERS                                           | 36  | 0.5971319  | -0.4186293 | -1.4503089 | 0.0620985  | 0.999 | 1567 | tags=25%, list=15%, signal=29%  |
| REACTOME_SYNTHESIS_OF_BILE_ACIDS_AND_BILE_SALTS                 | 17  | 0.59729177 | -0.4758871 | -1.4532632 | 0.07010309 | 0.999 | 2693 | tags=41%, list=26%, signal=55%  |
| REACTOME_PTM_GAMMA_CARBOXYLATION_HYPUSINE_FORMATION_AND_AR      | 19  | 0.60475    | -0.5013716 | -1.4540917 | 0.07509881 | 0.999 | 4207 | tags=79%, list=40%, signal=132% |
| REACTOME_CHEMOKINE_RECEPTORS_BIND_CHEMOKINES                    | 41  | 0.60759217 | -0.4103668 | -1.2491251 | 0.22535211 | 1     | 3173 | tags=44%, list=30%, signal=63%  |
| BIOCARTA_NFKB_PATHWAY                                           | 21  | 0.6094431  | -0.4314221 | -1.2500192 | 0.19861431 | 1     | 2335 | tags=43%, list=22%, signal=55%  |
| REACTOME_HDL_MEDIATED_LIPID_TRANSPORT                           | 15  | 0.6094879  | -0.5642002 | -1.4558189 | 0.08924949 | 0.999 | 1918 | tags=47%, list=18%, signal=57%  |
| PID_INTEGRIN1_PATHWAY                                           | 61  | 0.6127677  | -0.5370969 | -1.529048  | 0.09307359 | 0.992 | 3345 | tags=61%, list=32%, signal=89%  |
| REACTOME_INTRINSIC_PATHWAY                                      | 15  | 0.6130578  | -0.6061713 | -1.53773   | 0.05555556 | 0.992 | 2886 | tags=60%, list=28%, signal=83%  |
| KEGG_AUTOIMMUNE_THYROID_DISEASE                                 | 38  | 0.6157489  | -0.5552863 | -1.480942  | 0.13333334 | 0.998 | 2950 | tags=55%, list=28%, signal=77%  |
| BIOCARTA_IL22BP_PATHWAY                                         | 15  | 0.6177552  | -0.6242877 | -1.5033464 | 0.08131868 | 0.996 | 2648 | tags=60%, list=25%, signal=80%  |



|                                                                            |     |            |            |            |            |       |      |                                 |
|----------------------------------------------------------------------------|-----|------------|------------|------------|------------|-------|------|---------------------------------|
| REACTOME_INHIBITION_OF_INSULIN_SECRETION_BY_ADRENALINE_NORADRENALINE       | 19  | 0.6183435  | -0.4896411 | -1.4596084 | 0.07676349 | 0.999 | 2123 | tags=47%, list=20%, signal=59%  |
| REACTOME_A_TETRASACCHARIDE_LINKER_SEQUENCE_IS_REQUIRED_FOR_GAG_LINKAGE     | 18  | 0.61844987 | -0.517308  | -1.456245  | 0.09611452 | 0.999 | 1643 | tags=39%, list=16%, signal=46%  |
| PID_LYMPHANGIOGENESIS_PATHWAY                                              | 23  | 0.61955637 | -0.4432464 | -1.2428099 | 0.20842105 | 1     | 2243 | tags=43%, list=22%, signal=55%  |
| REACTOME_PATELET_AGGREGATION_PLUG_FORMATION                                | 31  | 0.61962664 | -0.3735405 | -1.2396431 | 0.19866072 | 1     | 1234 | tags=23%, list=12%, signal=26%  |
| KEGG_TRYPTOPHAN_METABOLISM                                                 | 29  | 0.62199587 | -0.4188716 | -1.2402942 | 0.21748401 | 1     | 3841 | tags=59%, list=37%, signal=93%  |
| KEGG_NEUROACTIVE_LIGAND_RECEPTOR_INTERACTION                               | 215 | 0.62320006 | -0.3091188 | -1.4823564 | 0.02762431 | 0.998 | 4086 | tags=48%, list=39%, signal=77%  |
| PID_IL4_2PATHWAY                                                           | 55  | 0.62382185 | -0.4276163 | -1.530511  | 0.05620609 | 0.992 | 2572 | tags=42%, list=25%, signal=55%  |
| REACTOME_G_ALPHA_Q_SIGNALING_EVENTS                                        | 130 | 0.6254084  | -0.3399415 | -1.4853116 | 0.03694581 | 0.997 | 3539 | tags=48%, list=34%, signal=71%  |
| REACTOME_CGMP_EFFECTS                                                      | 18  | 0.62573785 | -0.5426372 | -1.5212076 | 0.04496788 | 0.994 | 2013 | tags=44%, list=19%, signal=55%  |
| BIOCARTA_ETS_PATHWAY                                                       | 15  | 0.6272977  | -0.5421287 | -1.4740616 | 0.06418219 | 0.998 | 696  | tags=40%, list=7%, signal=43%   |
| PID_ALK1PATHWAY                                                            | 25  | 0.62786615 | -0.4983035 | -1.4600825 | 0.06315789 | 0.999 | 867  | tags=28%, list=8%, signal=30%   |
| REACTOME_PHASE1_FUNCTIONALIZATION_OF_COMPOUNDS                             | 56  | 0.62799156 | -0.4095584 | -1.5382996 | 0.05128205 | 0.992 | 4408 | tags=66%, list=42%, signal=114% |
| BIOCARTA_LONGEVITY_PATHWAY                                                 | 15  | 0.62897176 | -0.5298455 | -1.4918061 | 0.08387097 | 0.997 | 3269 | tags=67%, list=31%, signal=97%  |
| REACTOME_LIPOPROTEIN_METABOLISM                                            | 25  | 0.6290628  | -0.5118359 | -1.5041622 | 0.07874016 | 0.996 | 2678 | tags=48%, list=26%, signal=64%  |
| REACTOME_NUCLEAR_SIGNALING_BY_ERBB4                                        | 34  | 0.63036555 | -0.354903  | -1.2147069 | 0.19954649 | 1     | 2313 | tags=35%, list=22%, signal=45%  |
| KEGG_GLYCEROLIPID_METABOLISM                                               | 36  | 0.6315195  | -0.3383188 | -1.218982  | 0.19474836 | 1     | 1290 | tags=22%, list=12%, signal=25%  |
| BIOCARTA_TOB1_PATHWAY                                                      | 19  | 0.63182133 | -0.4425661 | -1.2156498 | 0.27162978 | 1     | 3496 | tags=63%, list=34%, signal=95%  |
| KEGG_PPARG_SIGNALING_PATHWAY                                               | 60  | 0.63381934 | -0.4554198 | -1.5413635 | 0.07991803 | 0.989 | 2211 | tags=35%, list=21%, signal=44%  |
| ST_B_CELL_ANTIEN_RECEPTOR                                                  | 38  | 0.6343777  | -0.3679514 | -1.2160996 | 0.2274678  | 1     | 2484 | tags=37%, list=24%, signal=48%  |
| BIOCARTA_TOLL_PATHWAY                                                      | 31  | 0.63475925 | -0.3687848 | -1.2191936 | 0.19638826 | 1     | 1562 | tags=35%, list=15%, signal=42%  |
| REACTOME_BOTULINUM_NEUROTOXICITY                                           | 15  | 0.6351439  | -0.5188067 | -1.4862208 | 0.06540085 | 0.997 | 1579 | tags=53%, list=15%, signal=63%  |
| REACTOME_CLASS_B_2_SECRETIN_FAMILY_RECEPTORS                               | 70  | 0.63532186 | -0.3543872 | -1.4612439 | 0.03385417 | 0.999 | 3802 | tags=54%, list=37%, signal=85%  |
| REACTOME_SMOOTH_MUSCLE_CONTRACTION                                         | 19  | 0.63736725 | -0.6057705 | -1.5058098 | 0.08860759 | 0.996 | 1437 | tags=53%, list=14%, signal=61%  |
| REACTOME_VOLTAGE_GATED_POTASSIUM_CHANNELS                                  | 32  | 0.6378049  | -0.360348  | -1.2082812 | 0.23198198 | 1     | 2827 | tags=38%, list=27%, signal=51%  |
| PID_SYNDANAN_1_PATHWAY                                                     | 45  | 0.6378114  | -0.4130927 | -1.2210714 | 0.2638298  | 1     | 3558 | tags=53%, list=34%, signal=81%  |
| PID_ALPHASYNNUCLEIN_PATHWAY                                                | 32  | 0.6379419  | -0.3893941 | -1.219476  | 0.22769953 | 1     | 1752 | tags=34%, list=17%, signal=41%  |
| KEGG_DILATED_CARDIOMYOPATHY                                                | 80  | 0.63800967 | -0.3253596 | -1.2051425 | 0.24248497 | 1     | 3304 | tags=40%, list=32%, signal=58%  |
| REACTOME_GLYCOSAMINOGLYCAN_METABOLISM                                      | 83  | 0.63802946 | -0.400847  | -1.4931555 | 0.05530974 | 0.997 | 2990 | tags=48%, list=29%, signal=67%  |
| REACTOME_MAP_KINASE_ACTIVATION_IN_TLR_CASCADE                              | 43  | 0.6384384  | -0.3358693 | -1.2065216 | 0.19438446 | 1     | 2307 | tags=40%, list=22%, signal=51%  |
| PID_RHOA_REG_PATHWAY                                                       | 35  | 0.6392592  | -0.3571461 | -1.1969688 | 0.20386267 | 1     | 2668 | tags=49%, list=26%, signal=65%  |
| KEGG_PRION_DISEASES                                                        | 33  | 0.6406993  | -0.3593381 | -1.1949155 | 0.24537037 | 1     | 2019 | tags=33%, list=19%, signal=41%  |
| REACTOME_NCAM1_INTERACTIONS                                                | 39  | 0.6408304  | -0.3850394 | -1.2213975 | 0.22494887 | 1     | 3045 | tags=38%, list=29%, signal=54%  |
| REACTOME_REGULATION_OF_INSULIN LIKE_GROWTH_FACTOR_IGF_ACTIVITY             | 15  | 0.6411199  | -0.5730577 | -1.5088944 | 0.08315098 | 0.996 | 4081 | tags=87%, list=39%, signal=142% |
| KEGG_CALCIIUM_SIGNALING_PATHWAY                                            | 149 | 0.6411422  | -0.270849  | -1.229175  | 0.15085158 | 1     | 2798 | tags=32%, list=27%, signal=43%  |
| REACTOME_HEPARAN_SULFATE_HEPARIN_HS_GAG_METABOLISM                         | 39  | 0.64139044 | -0.428847  | -1.4661487 | 0.06991526 | 0.998 | 1643 | tags=31%, list=16%, signal=36%  |
| ST_ERK1_ERK2_MAPK_PATHWAY                                                  | 29  | 0.64157104 | -0.3698161 | -1.2082872 | 0.20940171 | 1     | 2242 | tags=48%, list=22%, signal=61%  |
| REACTOME_IMMUNOREGULATOR_INTERACTIONS_BETWEEN_A_LYMPHOID_CELL_AND_A_T_CELL | 49  | 0.64286727 | -0.4566815 | -1.1969746 | 0.2982456  | 1     | 3321 | tags=61%, list=32%, signal=89%  |
| REACTOME_NEGATIVE_REGULATION_OF_FGFR_SIGNALING                             | 32  | 0.64306253 | -0.341906  | -1.2268977 | 0.19294117 | 1     | 2015 | tags=34%, list=19%, signal=42%  |
| BIOCARTA_INTEGRIN_PATHWAY                                                  | 34  | 0.6432572  | -0.3828544 | -1.2252836 | 0.20930232 | 1     | 1435 | tags=29%, list=14%, signal=34%  |
| PID_AMB2_NEUTROPHILS_PATHWAY                                               | 39  | 0.6437716  | -0.4693961 | -1.4621829 | 0.09069768 | 0.999 | 3150 | tags=62%, list=30%, signal=88%  |
| REACTOME_G_ALPHA1213_SIGNALING_EVENTS                                      | 60  | 0.6441122  | -0.3078745 | -1.2233812 | 0.16404495 | 1     | 2151 | tags=38%, list=21%, signal=48%  |
| SA_TRKCA_RECEPTOR                                                          | 15  | 0.6443734  | -0.4168692 | -1.2216179 | 0.23368421 | 1     | 3053 | tags=47%, list=29%, signal=66%  |
| BIOCARTA_INFLAM_PATHWAY                                                    | 27  | 0.6445971  | -0.53009   | -1.5435476 | 0.08744395 | 0.989 | 3496 | tags=70%, list=34%, signal=106% |
| KEGG_METABOLISM_OF_XENOBIOTICS_BY_CYTOCHROME_P450                          | 42  | 0.64468193 | -0.3579689 | -1.2008517 | 0.2527233  | 1     | 4408 | tags=57%, list=42%, signal=99%  |
| BIOCARTA_IL7_PATHWAY                                                       | 17  | 0.64501876 | -0.4866537 | -1.1975935 | 0.29872882 | 1     | 3269 | tags=53%, list=31%, signal=77%  |
| REACTOME_SIGNALING_BY_RHO_GTPASES                                          | 76  | 0.64635384 | -0.2952502 | -1.1986072 | 0.20689656 | 1     | 2479 | tags=42%, list=24%, signal=55%  |
| BIOCARTA_TID_PATHWAY                                                       | 18  | 0.64734554 | -0.4169397 | -1.1832836 | 0.24361949 | 1     | 1561 | tags=28%, list=15%, signal=33%  |
| PID_MYC_REPRESSPATHWAY                                                     | 58  | 0.6487673  | -0.3045411 | -1.1841885 | 0.19864559 | 1     | 2665 | tags=38%, list=26%, signal=51%  |
| REACTOME_ACTIVATION_OF_THE_MRNA_UPON_BINDING_OF_THE_CAP_BINDING_COMPLEX    | 40  | 0.64993787 | -0.5004834 | -1.1880835 | 0.3146998  | 1     | 2563 | tags=63%, list=25%, signal=83%  |
| BIOCARTA_TNFR2_PATHWAY                                                     | 17  | 0.651283   | -0.4461338 | -1.1891267 | 0.2885906  | 1     | 3477 | tags=65%, list=33%, signal=97%  |
| REACTOME_INTEGRIN_ALPHAIIIB_BETA3_SIGNALING                                | 24  | 0.65136236 | -0.3778603 | -1.18458   | 0.24835165 | 1     | 1234 | tags=21%, list=12%, signal=24%  |
| KEGG_PHENYLALANINE_METABOLISM                                              | 16  | 0.65272546 | -0.4046997 | -1.151269  | 0.2901879  | 1     | 2480 | tags=38%, list=24%, signal=49%  |
| KEGG_ARRHYTHMOGENIC_RIGHT_VENTRICULAR_CARDIOMYOPATHY_ARVC                  | 67  | 0.65312016 | -0.3199324 | -1.1853167 | 0.2516129  | 1     | 3304 | tags=37%, list=32%, signal=54%  |
| REACTOME_NITRIC_OXIDE_STIMULATES_GUANYLATE_CYCLASE                         | 23  | 0.65341526 | -0.5249937 | -1.5464495 | 0.05508475 | 0.989 | 2013 | tags=39%, list=19%, signal=48%  |
| KEGG_RETINOL_METABOLISM                                                    | 38  | 0.6536344  | -0.4561518 | -1.5097104 | 0.07432433 | 0.996 | 3723 | tags=53%, list=36%, signal=82%  |
| REACTOME_G_BETA_GAMMA_SIGNALING_THROUGH_PLCA_BETA                          | 15  | 0.6539434  | -0.3857637 | -1.1438916 | 0.30703625 | 1     | 2123 | tags=40%, list=20%, signal=50%  |
| REACTOME_SIGNALING_BY_ERBB4                                                | 75  | 0.6539711  | -0.2797236 | -1.1493894 | 0.225058   | 1     | 2144 | tags=31%, list=21%, signal=38%  |
| PID_INTEGRIN_A9B1_PATHWAY                                                  | 22  | 0.6542906  | -0.3967454 | -1.1533129 | 0.30967742 | 1     | 3473 | tags=64%, list=33%, signal=95%  |
| REACTOME_INTERFERON_ALPHA_BETA_SIGNALING                                   | 52  | 0.6546287  | -0.4125952 | -1.1463385 | 0.34581497 | 1     | 3160 | tags=44%, list=30%, signal=63%  |
| PID_IL3_PATHWAY                                                            | 22  | 0.6547329  | -0.3474111 | -1.1517918 | 0.23873875 | 1     | 3182 | tags=41%, list=31%, signal=59%  |
| REACTOME_KERATAN_SULFATE_BIOSYNTHESIS                                      | 22  | 0.65485716 | -0.3646132 | -1.1544285 | 0.2637131  | 1     | 3174 | tags=50%, list=30%, signal=72%  |
| BIOCARTA_PDGF_PATHWAY                                                      | 29  | 0.6557033  | -0.3651637 | -1.178349  | 0.23706897 | 1     | 2144 | tags=38%, list=21%, signal=48%  |
| PID_ARF6_PATHWAY                                                           | 26  | 0.65578854 | -0.3429992 | -1.1472412 | 0.25917926 | 1     | 2859 | tags=42%, list=27%, signal=58%  |
| KEGG_TYPE_I_DIABETES_MELLITUS                                              | 36  | 0.65585065 | -0.4311746 | -1.1443877 | 0.34657836 | 1     | 2803 | tags=44%, list=27%, signal=61%  |
| REACTOME_TRANSLATION                                                       | 111 | 0.6570132  | -0.4393093 | -1.1717955 | 0.34       | 1     | 2563 | tags=54%, list=25%, signal=71%  |
| SIG_CD40PATHWAYMAP                                                         | 33  | 0.6572998  | -0.3408825 | -1.1547666 | 0.26593408 | 1     | 2657 | tags=48%, list=26%, signal=65%  |
| BIOCARTA_IL1R_PATHWAY                                                      | 29  | 0.65782756 | -0.3520851 | -1.1559615 | 0.26636568 | 1     | 2564 | tags=45%, list=25%, signal=59%  |
| REACTOME_TRAF6_MEDIATED_INDUCION_OF_NFKB_AND_MAP_KINASES_UPSTREAM_OF_IRAK1 | 64  | 0.6587152  | -0.30055   | -1.1725247 | 0.21002387 | 1     | 2335 | tags=39%, list=22%, signal=50%  |
| BIOCARTA_HDAC_PATHWAY                                                      | 26  | 0.6589621  | -0.3520685 | -1.1610585 | 0.25       | 1     | 1983 | tags=27%, list=19%, signal=33%  |
| KEGG_GLYCEROPHOSPHOLIPID_METABOLISM                                        | 54  | 0.6590482  | -0.3058065 | -1.1568797 | 0.22792608 | 1     | 1290 | tags=22%, list=12%, signal=25%  |
| PID_IL12_STAT4PATHWAY                                                      | 31  | 0.65937173 | -0.4328154 | -1.1636447 | 0.3106383  | 1     | 3068 | tags=65%, list=29%, signal=91%  |
| REACTOME_PHOSPHOLIPASE_C_MEDIATED_CASCADE                                  | 43  | 0.659376   | -0.3180473 | -1.1738058 | 0.20975609 | 1     | 1495 | tags=23%, list=14%, signal=27%  |
| ST_GAQ_PATHWAY                                                             | 25  | 0.6596368  | -0.3700974 | -1.1594088 | 0.27157894 | 1     | 2579 | tags=48%, list=25%, signal=64%  |
| KEGG_PEROXISOME                                                            | 65  | 0.6600321  | -0.335429  | -1.1750021 | 0.2584746  | 1     | 2600 | tags=40%, list=25%, signal=53%  |
| REACTOME_CYTOCHROME_P450_ARRANGED_BY_SUBSTRATE_TYPE                        | 40  | 0.6606188  | -0.312685  | -1.165865  | 0.25870648 | 1     | 4408 | tags=60%, list=42%, signal=104% |
| BIOCARTA_PGC1A_PATHWAY                                                     | 20  | 0.660625   | -0.3997104 | -1.164531  | 0.2718254  | 1     | 2499 | tags=35%, list=24%, signal=46%  |
| PID_INTEGRIN2_PATHWAY                                                      | 28  | 0.66062605 | -0.5585262 | -1.5499216 | 0.06768559 | 0.989 | 3339 | tags=71%, list=32%, signal=105% |
| REACTOME_PI3K_EVENTS_IN_ERBB4_SIGNALING                                    | 29  | 0.6610579  | -0.3510473 | -1.1574856 | 0.26004228 | 1     | 2125 | tags=34%, list=20%, signal=43%  |
| REACTOME_INTERFERON_GAMMA_SIGNALING                                        | 45  | 0.66224265 | -0.4102501 | -1.1610906 | 0.32079646 | 1     | 3018 | tags=51%, list=29%, signal=72%  |
| REACTOME_ADD_SIGNALING_THROUGH_P2RY12                                      | 15  | 0.6625559  | -0.4009977 | -1.1679133 | 0.2602459  | 1     | 2123 | tags=47%, list=20%, signal=59%  |
| REACTOME_GLUTAMATE_NEUROTRANSMITTER_RELEASE_CYCLE                          | 15  | 0.66381884 | -0.4255651 | -1.1659912 | 0.29124236 | 1     | 851  | tags=20%, list=8%, signal=22%   |
| REACTOME_BILE_ACID_AND_BILE_SALT_METABOLISM                                | 23  | 0.6737155  | -0.3415297 | -1.1326206 | 0.3135965  | 1     | 2693 | tags=30%, list=26%, signal=41%  |
| REACTOME_ACTIVATION_OF_CHAPERONE_GENES_BY_XBP1S                            | 39  | 0.67568123 | -0.3486021 | -1.1331412 | 0.30120483 | 1     | 756  | tags=21%, list=7%, signal=22%   |
| REACTOME_KERATAN_SULFATE_KERATIN_METABOLISM                                | 26  | 0.6787664  | -0.3564373 | -1.1263536 | 0.32173914 | 1     | 3174 | tags=46%, list=30%, signal=66%  |
| BIOCARTA_GCR_PATHWAY                                                       | 18  | 0.67914027 | -0.372852  | -1.1275477 | 0.29130435 | 1     | 755  | tags=28%, list=7%, signal=30%   |
| KEGG_RIBOSOME                                                              | 67  | 0.6803679  | -0.7042245 | -1.5503064 | 0.1017964  | 0.989 | 2563 | tags=82%, list=25%, signal=108% |
| PID_GLYPICAN_1PATHWAY                                                      | 25  | 0.6806111  | -0.3821259 | -1.1282669 | 0.308204   | 1     | 3259 | tags=64%, list=31%, signal=93%  |
| KEGG_VEGF_SIGNALING_PATHWAY                                                | 66  | 0.6907506  | -0.27643   | -1.114587  | 0.25342464 | 1     | 2136 | tags=32%, list=21%, signal=40%  |
| KEGG_HYPERTROPHIC_CARDIOMYOPATHY_HCM                                       | 76  | 0.69306695 | -0.3092411 | -1.1149173 | 0.32394367 | 1     | 3386 | tags=39%, list=33%, signal=58%  |
| REACTOME_AQUAPORIN_MEDIATED_TRANSPORT                                      | 38  | 0.69353956 | -0.3108159 | -1.1160587 | 0.29978117 | 1     | 2776 | tags=37%, list=27%, signal=50%  |
| BIOCARTA_IL6_PATHWAY                                                       | 21  | 0.6946696  | -0.3555237 | -1.1182449 | 0.29284164 | 1     | 2144 | tags=38%, list=21%, signal=48%  |
| PID_PDGFRA_PATHWAY                                                         | 20  | 0.6949532  | -0.3809907 | -1.1167861 | 0.30932203 | 1     | 2144 | tags=40%, list=21%, signal=50%  |
| KEGG_ECM_RECEPTOR_INTERACTION                                              | 77  | 0.69831127 | -0.4844724 | -1.5514652 | 0.05764967 | 0.988 | 3339 | tags=60%, list=32%, signal=87%  |

|                                                          |     |            |            |            |            |       |      |                                 |
|----------------------------------------------------------|-----|------------|------------|------------|------------|-------|------|---------------------------------|
| PID ERA GENOMIC PATHWAY                                  | 54  | 0.6992197  | -0.2793837 | -1.1096123 | 0.2880562  | 1     | 2390 | tags=30%, list=23%, signal=38%  |
| REACTOME G PROTEIN ACTIVATION                            | 21  | 0.70299494 | -0.3487055 | -1.1067581 | 0.33261338 | 1     | 2123 | tags=33%, list=20%, signal=42%  |
| REACTOME DOWNSTREAM SIGNALING OF ACTIVATED FGFR          | 79  | 0.7052843  | -0.2660226 | -1.1045266 | 0.27380952 | 1     | 1280 | tags=20%, list=12%, signal=23%  |
| KEGG MELANOMA                                            | 66  | 0.7205543  | -0.2660927 | -1.0965896 | 0.33171913 | 1     | 1565 | tags=27%, list=15%, signal=32%  |
| REACTOME RIP MEDIATED NFKB ACTIVATION VIA DAI            | 16  | 0.72094774 | -0.3814566 | -1.0937997 | 0.35920176 | 1     | 2484 | tags=50%, list=24%, signal=66%  |
| REACTOME GPCR DOWNSTREAM SIGNALING                       | 382 | 0.72197324 | -0.3225404 | -1.1551527 | 0.01851852 | 0.988 | 2847 | tags=33%, list=27%, signal=44%  |
| PID CD40 PATHWAY                                         | 28  | 0.7225331  | -0.3563371 | -1.0944629 | 0.345898   | 1     | 3214 | tags=54%, list=31%, signal=77%  |
| BIOCARTA CYTOKINE PATHWAY                                | 20  | 0.7245485  | -0.3988189 | -1.0827472 | 0.40358743 | 1     | 3496 | tags=55%, list=34%, signal=83%  |
| ST TUMOR NECROSIS FACTOR PATHWAY                         | 27  | 0.7249519  | -0.3587029 | -1.0894536 | 0.3478261  | 1     | 2484 | tags=44%, list=24%, signal=58%  |
| KEGG PROPANOATE METABOLISM                               | 26  | 0.72498715 | -0.4093079 | -1.090663  | 0.39376217 | 1     | 2884 | tags=46%, list=28%, signal=64%  |
| BIOCARTA EPO PATHWAY                                     | 18  | 0.7269514  | -0.3539807 | -1.0804803 | 0.33860046 | 1     | 696  | tags=22%, list=7%, signal=24%   |
| REACTOME GLYCOPHINGOLIPID METABOLISM                     | 24  | 0.72707707 | -0.3554353 | -1.0843624 | 0.34349594 | 1     | 3550 | tags=46%, list=34%, signal=69%  |
| KEGG TOLL LIKE RECEPTOR SIGNALING PATHWAY                | 88  | 0.7275938  | -0.2863486 | -1.0869315 | 0.32751092 | 1     | 2737 | tags=36%, list=26%, signal=49%  |
| BIOCARTA KERATINOCYTE PATHWAY                            | 44  | 0.7276546  | -0.3026682 | -1.0827578 | 0.35402298 | 1     | 1631 | tags=27%, list=16%, signal=32%  |
| KEGG NITROGEN METABOLISM                                 | 22  | 0.72951925 | -0.3374034 | -1.078119  | 0.33982685 | 1     | 527  | tags=9%, list=5%, signal=10%    |
| BIOCARTA MYOSIN PATHWAY                                  | 28  | 0.73020536 | -0.3501068 | -1.0843834 | 0.37284482 | 1     | 1874 | tags=39%, list=18%, signal=48%  |
| PID GMCSF PATHWAY                                        | 33  | 0.7349802  | -0.3034751 | -1.0729924 | 0.3372093  | 1     | 3275 | tags=42%, list=31%, signal=62%  |
| REACTOME SPHINGOLIPID METABOLISM                         | 41  | 0.7353642  | -0.3069254 | -1.0701457 | 0.3640082  | 1     | 2232 | tags=29%, list=21%, signal=37%  |
| REACTOME SIGNALING BY FGFR                               | 89  | 0.73678327 | -0.2511147 | -1.0735505 | 0.33169532 | 1     | 2144 | tags=28%, list=21%, signal=35%  |
| REACTOME DEVELOPMENTAL BIOLOGY                           | 321 | 0.7370043  | -0.2345325 | -1.0707763 | 0.32374102 | 1     | 2260 | tags=26%, list=22%, signal=32%  |
| REACTOME PEPTIDE CHAIN ELONGATION                        | 66  | 0.7375271  | -0.7183899 | -1.5597084 | 0.09980431 | 0.987 | 2563 | tags=85%, list=25%, signal=112% |
| PID ATF2 PATHWAY                                         | 55  | 0.738529   | -0.2775979 | -1.0661504 | 0.35730338 | 1     | 1106 | tags=20%, list=11%, signal=22%  |
| PID RHOA PATHWAY                                         | 42  | 0.7396446  | -0.3115107 | -1.0669869 | 0.38266385 | 1     | 1629 | tags=26%, list=16%, signal=31%  |
| KEGG BUTANOATE METABOLISM                                | 30  | 0.7409131  | -0.3468449 | -1.0611486 | 0.38045737 | 1     | 2496 | tags=33%, list=24%, signal=44%  |
| KEGG RENIN ANGIOTENSIN SYSTEM                            | 16  | 0.7410856  | -0.5462792 | -1.5529585 | 0.05831533 | 0.988 | 2847 | tags=38%, list=27%, signal=52%  |
| KEGG VALINE LEUCINE AND ISOLEUCINE DEGRADATION           | 40  | 0.7420012  | -0.3658183 | -1.0633801 | 0.41535434 | 1     | 3125 | tags=45%, list=30%, signal=64%  |
| REACTOME ERK MAPK TARGETS                                | 20  | 0.7436047  | -0.3527395 | -1.0613018 | 0.3678862  | 1     | 2221 | tags=40%, list=21%, signal=51%  |
| BIOCARTA EGF PATHWAY                                     | 28  | 0.7468152  | -0.3215616 | -1.0573988 | 0.36796537 | 1     | 2144 | tags=32%, list=21%, signal=40%  |
| PID PTP1BPATHWAY                                         | 50  | 0.7517919  | -0.4379496 | -1.5756196 | 0.02386635 | 0.984 | 2859 | tags=48%, list=27%, signal=66%  |
| REACTOME GLUCAGON TYPE LIGAND RECEPTORS                  | 27  | 0.7540618  | -0.4663567 | -1.5818874 | 0.025      | 0.982 | 2123 | tags=44%, list=20%, signal=56%  |
| BIOCARTA CTCF PATHWAY                                    | 24  | 0.75688    | -0.3452296 | -1.0518507 | 0.3786611  | 1     | 2209 | tags=32%, list=21%, signal=40%  |
| REACTOME SIGNALING BY SCF KIT                            | 66  | 0.7603348  | -0.2623334 | -1.0477079 | 0.36744186 | 1     | 2125 | tags=29%, list=20%, signal=36%  |
| BIOCARTA PPARA PATHWAY                                   | 49  | 0.76056165 | -0.3196028 | -1.0463605 | 0.40430108 | 1     | 1881 | tags=24%, list=18%, signal=30%  |
| BIOCARTA IL2 PATHWAY                                     | 21  | 0.76229453 | -0.3510092 | -1.0482024 | 0.3847826  | 1     | 696  | tags=19%, list=7%, signal=20%   |
| REACTOME COLLAGEN FORMATION                              | 49  | 0.76244235 | -0.568419  | -1.5606136 | 0.07659575 | 0.987 | 2958 | tags=53%, list=28%, signal=74%  |
| PID ANTHRAXPATHWAY                                       | 16  | 0.7630924  | -0.5391004 | -1.5870569 | 0.02754237 | 0.982 | 1574 | tags=38%, list=15%, signal=44%  |
| KEGG PATHWAYS IN CANCER                                  | 299 | 0.76540065 | -0.2180219 | -1.0417453 | 0.34963325 | 1     | 1777 | tags=23%, list=17%, signal=27%  |
| REACTOME HEMOSTASIS                                      | 380 | 0.76820266 | -0.2247469 | -1.041849  | 0.3887468  | 1     | 2438 | tags=30%, list=23%, signal=37%  |
| BIOCARTA CARDIACEGF PATHWAY                              | 17  | 0.76821864 | -0.5691155 | -1.6615808 | 0.0239521  | 0.93  | 3214 | tags=65%, list=31%, signal=93%  |
| REACTOME SIGNALING_BY_PDGF                               | 103 | 0.7684047  | -0.2623421 | -1.0352741 | 0.39035088 | 1     | 2811 | tags=35%, list=27%, signal=47%  |
| PID CXCR4 PATHWAY                                        | 88  | 0.7685725  | -0.2873356 | -1.0288697 | 0.38428876 | 1     | 2342 | tags=33%, list=22%, signal=42%  |
| REACTOME REGULATION OF WATER BALANCE BY RENAL AQUAPORINS | 32  | 0.7690177  | -0.2950108 | -1.0389639 | 0.38396624 | 1     | 2776 | tags=38%, list=27%, signal=51%  |
| ST_GA12_PATHWAY                                          | 22  | 0.76911009 | -0.3313283 | -1.0324295 | 0.3923241  | 1     | 2302 | tags=41%, list=22%, signal=52%  |
| KEGG_VASCULAR_SMOOTH_MUSCLE_CONTRACTION                  | 95  | 0.76931924 | -0.2500427 | -1.0362    | 0.3716216  | 1     | 1432 | tags=21%, list=14%, signal=24%  |
| REACTOME_CD28_DEPENDENT_PI3K_AKT_SIGNALING               | 17  | 0.76992226 | -0.3645398 | -1.0373148 | 0.4122807  | 1     | 2779 | tags=47%, list=27%, signal=64%  |
| REACTOME_BASIGIN_INTERACTIONS                            | 23  | 0.77086395 | -0.314843  | -1.0291635 | 0.40384614 | 1     | 3116 | tags=39%, list=30%, signal=56%  |
| REACTOME_CELL_JUNCTION_ORGANIZATION                      | 62  | 0.7708867  | -0.2768465 | -1.0329255 | 0.42753622 | 1     | 1580 | tags=21%, list=15%, signal=25%  |
| PID_A6B1_A6B4_INTEGRIN_PATHWAY                           | 44  | 0.7734803  | -0.2835947 | -1.029324  | 0.4213974  | 1     | 2859 | tags=45%, list=27%, signal=62%  |
| REACTOME REGULATION OF INSULIN SECRETION                 | 73  | 0.7759134  | -0.254422  | -1.0245311 | 0.39597315 | 1     | 1908 | tags=22%, list=18%, signal=27%  |
| BIOCARTA_NOZIL12_PATHWAY                                 | 15  | 0.7815312  | -0.4950345 | -1.0156984 | 0.4861996  | 1     | 3484 | tags=67%, list=33%, signal=100% |
| REACTOME_GAP_JUNCTION_TRAFFICKING                        | 16  | 0.78228056 | -0.3550306 | -1.0141267 | 0.43340382 | 1     | 1796 | tags=31%, list=17%, signal=38%  |
| REACTOME_INTEGRATION_OF_ENERGY_METABOLISM                | 96  | 0.7833501  | -0.2447429 | -1.0161996 | 0.42152467 | 1     | 1908 | tags=21%, list=18%, signal=25%  |
| KEGG GLYCINE SERINE AND THREONINE METABOLISM             | 27  | 0.78554785 | -0.3184278 | -1.0114597 | 0.4385965  | 1     | 2845 | tags=44%, list=27%, signal=61%  |
| PID_AVB3_OPN_PATHWAY                                     | 29  | 0.7858879  | -0.3241288 | -1.0176368 | 0.41949153 | 1     | 696  | tags=21%, list=7%, signal=22%   |
| REACTOME_SIGNALING_BY_ILS                                | 95  | 0.78591025 | -0.2685388 | -1.0163591 | 0.42542788 | 1     | 2564 | tags=36%, list=25%, signal=47%  |
| KEGG_CHEMOKINE_SIGNALING_PATHWAY                         | 148 | 0.78769374 | -0.2591809 | -1.0181191 | 0.4        | 1     | 2437 | tags=32%, list=23%, signal=42%  |
| KEGG_INTESTINAL_IMMUNE_NETWORK_FOR_IGA_PRODUCTION        | 35  | 0.79134214 | -0.5979724 | -1.5609095 | 0.09030837 | 0.987 | 2932 | tags=63%, list=28%, signal=87%  |
| REACTOME_EXTRACELLULAR_MATRIX_ORGANIZATION               | 73  | 0.7924209  | -0.5301665 | -1.6033568 | 0.05139186 | 0.972 | 2958 | tags=51%, list=28%, signal=70%  |
| REACTOME_NEUROTRANSMITTER_RELEASE_CYCLE                  | 32  | 0.7931099  | -0.2927794 | -1.0070221 | 0.401766   | 1     | 1427 | tags=16%, list=14%, signal=18%  |
| PID_SHP2_PATHWAY                                         | 53  | 0.7986719  | -0.2738186 | -0.9996564 | 0.4701835  | 1     | 2144 | tags=28%, list=21%, signal=35%  |
| KEGG_ASTHMA                                              | 22  | 0.79909426 | -0.6269477 | -1.5870966 | 0.07349666 | 0.982 | 2583 | tags=64%, list=25%, signal=84%  |
| BIOCARTA_VIP_PATHWAY                                     | 21  | 0.8014496  | -0.3306402 | -1.000992  | 0.4361055  | 1     | 3257 | tags=57%, list=31%, signal=83%  |
| REACTOME_INTERACTION_BETWEEN_L1_AND_ANKYRINS             | 21  | 0.8015679  | -0.3423361 | -0.9996676 | 0.47609147 | 1     | 2486 | tags=43%, list=24%, signal=56%  |
| REACTOME_GABA_B_RECEPTOR_ACTIVATION                      | 30  | 0.8015687  | -0.2781311 | -0.9957808 | 0.46495327 | 1     | 2282 | tags=33%, list=22%, signal=43%  |
| KEGG_COMPLEMENT_AND_COAGULATION_CASCADES                 | 65  | 0.8018229  | -0.5599576 | -1.7193389 | 0.02195609 | 0.838 | 4102 | tags=83%, list=39%, signal=136% |
| BIOCARTA_PAR1_PATHWAY                                    | 34  | 0.8021083  | -0.3110012 | -1.0019943 | 0.45238096 | 1     | 1908 | tags=35%, list=18%, signal=43%  |
| BIOCARTA_TCR_PATHWAY                                     | 38  | 0.8037704  | -0.3013451 | -0.9961276 | 0.44805196 | 1     | 3269 | tags=53%, list=31%, signal=76%  |
| REACTOME_DOWNSTREAM_SIGNAL_TRANSDUCTION                  | 76  | 0.8061266  | -0.2504668 | -0.9924758 | 0.4699074  | 1     | 1565 | tags=22%, list=15%, signal=26%  |
| PID_INTEGRIN_CS_PATHWAY                                  | 23  | 0.8177721  | -0.5761822 | -1.6640897 | 0.02484472 | 0.925 | 3321 | tags=65%, list=32%, signal=96%  |
| KEGG_RENAL_CELL_CARINOMA                                 | 66  | 0.81948125 | -0.2451979 | -0.9830777 | 0.4801865  | 1     | 1881 | tags=29%, list=18%, signal=35%  |
| REACTOME_STEROID_HORMONES                                | 23  | 0.8197942  | -0.3328223 | -0.9842662 | 0.48958334 | 1     | 4325 | tags=48%, list=42%, signal=82%  |
| REACTOME_MYOGENESIS                                      | 23  | 0.8218895  | -0.3309243 | -0.9808155 | 0.49712092 | 1     | 2657 | tags=26%, list=26%, signal=35%  |
| BIOCARTA_MAPK_PATHWAY                                    | 85  | 0.8221626  | -0.2456415 | -0.9845116 | 0.48617512 | 1     | 2719 | tags=42%, list=26%, signal=57%  |
| PID_KITPATHWAY                                           | 48  | 0.8232825  | -0.2699789 | -0.9777713 | 0.47972974 | 1     | 2524 | tags=35%, list=24%, signal=47%  |
| PID_RAS_PATHWAY                                          | 22  | 0.8240834  | -0.295112  | -0.9787    | 0.46680942 | 1     | 1234 | tags=23%, list=12%, signal=26%  |
| PID_EPOPATHWAY                                           | 31  | 0.8248873  | -0.3120776 | -0.9759469 | 0.4683258  | 1     | 3053 | tags=48%, list=29%, signal=68%  |
| REACTOME_DIABETES_PATHWAYS                               | 110 | 0.82518995 | -0.2246375 | -0.9745578 | 0.47916666 | 1     | 895  | tags=15%, list=9%, signal=16%   |
| REACTOME_CHONDROITIN_SULFATE_DERMATAN_SULFATE_METABOLISM | 32  | 0.8255975  | -0.5491858 | -1.6737674 | 0.0371134  | 0.906 | 2990 | tags=59%, list=29%, signal=83%  |
| BIOCARTA_BIOPEPTIDES_PATHWAY                             | 38  | 0.8277161  | -0.2679426 | -0.9709743 | 0.5        | 1     | 2847 | tags=39%, list=27%, signal=54%  |
| REACTOME_PIP3_ACTIVATES_AKT_SIGNALING                    | 21  | 0.8292059  | -0.313602  | -0.9715343 | 0.49278352 | 1     | 2125 | tags=33%, list=20%, signal=42%  |
| PID_NFAT_TFPATHWAY                                       | 42  | 0.83299434 | -0.2934468 | -0.9662011 | 0.5100671  | 1     | 1381 | tags=24%, list=13%, signal=27%  |
| REACTOME_HS_GAG_DEGRADATION                              | 17  | 0.83356017 | -0.5653519 | -1.6404204 | 0.0359408  | 0.971 | 1643 | tags=47%, list=16%, signal=56%  |
| REACTOME_AXON_GUIDANCE                                   | 218 | 0.83387077 | -0.2225365 | -0.9633015 | 0.4965358  | 1     | 2506 | tags=29%, list=24%, signal=38%  |
| PID_ERBB4_PATHWAY                                        | 35  | 0.8346424  | -0.2883883 | -0.9642399 | 0.5409483  | 1     | 1881 | tags=29%, list=18%, signal=35%  |
| PID_VEGFR1_PATHWAY                                       | 25  | 0.83496547 | -0.3203345 | -0.9666514 | 0.49156117 | 1     | 1208 | tags=24%, list=12%, signal=27%  |
| PID_TNFSF6_PATHWAY                                       | 40  | 0.83565456 | -0.2635595 | -0.9198943 | 0.56207675 | 1     | 1998 | tags=30%, list=19%, signal=37%  |
| KEGG_ARGININE_AND_PROLINE_METABOLISM                     | 45  | 0.83722353 | -0.2552161 | -0.917905  | 0.5663717  | 1     | 3473 | tags=42%, list=33%, signal=63%  |
| REACTOME_RESPONSE_TO_ELEVATED_PLATELET_CYTOSOLIC_CA2     | 75  | 0.8375468  | -0.432658  | -1.5874063 | 0.03719913 | 0.982 | 1673 | tags=33%, list=16%, signal=39%  |
| KEGG_GNRH_SIGNALING_PATHWAY                              | 84  | 0.83755827 | -0.2126367 | -0.9202187 | 0.6033254  | 1     | 2719 | tags=32%, list=26%, signal=43%  |
| BIOCARTA_CTLA4_PATHWAY                                   | 18  | 0.8385422  | -0.409369  | -0.9209527 | 0.5641026  | 1     | 3022 | tags=50%, list=29%, signal=70%  |
| PID_TXA2PATHWAY                                          | 52  | 0.8402318  | -0.2718764 | -0.9213997 | 0.5519824  | 1     | 2859 | tags=44%, list=27%, signal=61%  |
| REACTOME_SIGNALING_BY_FGFR_IN_DISEASE                    | 99  | 0.8410352  | -0.2183839 | -0.9493163 | 0.5475     | 1     | 1495 | tags=22%, list=14%, signal=26%  |
| REACTOME_TIGHT_JUNCTION_INTERACTIONS                     | 22  | 0.84103924 | -0.290707  | -0.9125512 | 0.52164006 | 1     | 480  | tags=14%, list=5%, signal=14%   |

|                                                                    |     |            |            |            |            |       |      |                                 |
|--------------------------------------------------------------------|-----|------------|------------|------------|------------|-------|------|---------------------------------|
| REACTION_PI3K_EVENTS_IN_ERBB2_SIGNALING                            | 35  | 0.8416429  | -0.2684599 | -0.9219829 | 0.5469729  | 1     | 2125 | tags=29%, list=20%, signal=36%  |
| PID_HIF1_TFPATHWAY                                                 | 61  | 0.84168935 | -0.2574147 | -0.951382  | 0.537931   | 1     | 1216 | tags=16%, list=12%, signal=18%  |
| REACTION_G_ALPHA_2_SIGNALING_EVENTS                                | 34  | 0.841798   | -0.2714923 | -0.9464067 | 0.562212   | 1     | 2662 | tags=35%, list=26%, signal=47%  |
| ST_WNT_BETA_CATENIN_PATHWAY                                        | 29  | 0.84225726 | -0.2767129 | -0.9374605 | 0.5445344  | 1     | 3055 | tags=48%, list=29%, signal=68%  |
| SIG_PI3P_SIGNALING_IN_B_LYMPHOCYTES                                | 34  | 0.8427422  | -0.2743295 | -0.9141818 | 0.5537757  | 1     | 3086 | tags=38%, list=30%, signal=54%  |
| PID_FAK_PATHWAY                                                    | 53  | 0.8427724  | -0.2867166 | -0.9409182 | 0.54989386 | 1     | 1951 | tags=34%, list=19%, signal=42%  |
| KEGG_B_CELL_RECEPTOR_SIGNALING_PATHWAY                             | 64  | 0.8428131  | -0.2647736 | -0.9520943 | 0.5010846  | 1     | 3289 | tags=48%, list=32%, signal=70%  |
| KEGG_NOD LIKE_RECEPTOR_SIGNALING_PATHWAY                           | 52  | 0.8428204  | -0.2735958 | -0.9472415 | 0.48931116 | 1     | 2738 | tags=44%, list=26%, signal=60%  |
| REACTION_NGF_SIGNALING_VIA_TRKA_FROM_THE_PLASMA_MEMBRANE           | 117 | 0.8429149  | -0.211977  | -0.9128588 | 0.6088886  | 1     | 2221 | tags=27%, list=21%, signal=34%  |
| BIOCARTA_IL2RB_PATHWAY                                             | 37  | 0.8432727  | -0.2774167 | -0.9495577 | 0.48729792 | 1     | 3269 | tags=41%, list=31%, signal=59%  |
| PID_TRKRPATHWAY                                                    | 56  | 0.843493   | -0.2254492 | -0.9223447 | 0.6122931  | 1     | 2257 | tags=29%, list=22%, signal=36%  |
| KEGG_GLYCOSAMINOGLYCAN_BIOSYNTHESIS_HEPARAN_SULFATE                | 21  | 0.8435935  | -0.300743  | -0.9103038 | 0.56041664 | 1     | 2135 | tags=24%, list=21%, signal=30%  |
| PID_P53DOWNSTREAMPATHWAY                                           | 116 | 0.84418863 | -0.2239675 | -0.9415091 | 0.5515464  | 1     | 1833 | tags=24%, list=18%, signal=29%  |
| REACTION_INCRETIN_SYNTHESIS_SECRETION_AND_INACTIVATION             | 17  | 0.8442029  | -0.3101262 | -0.9527476 | 0.49561402 | 1     | 2123 | tags=24%, list=20%, signal=30%  |
| PID_CERAMIDE_PATHWAY                                               | 45  | 0.84431684 | -0.2391196 | -0.9244005 | 0.6061269  | 1     | 1561 | tags=22%, list=15%, signal=26%  |
| REACTION_PHOSPHOLIPID_METABOLISM                                   | 125 | 0.8446583  | -0.2153429 | -0.9376185 | 0.6004415  | 1     | 2369 | tags=27%, list=23%, signal=35%  |
| PID_FGF_PATHWAY                                                    | 50  | 0.8450945  | -0.2437598 | -0.9228215 | 0.5390244  | 1     | 2336 | tags=28%, list=22%, signal=36%  |
| BIOCARTA_ALK_PATHWAY                                               | 34  | 0.8451176  | -0.2805279 | -0.9047566 | 0.59565216 | 1     | 1254 | tags=21%, list=12%, signal=23%  |
| REACTION_IL_3_5_AND_GM-CSF_SIGNALING                               | 40  | 0.84512454 | -0.2805242 | -0.9071112 | 0.55011135 | 1     | 3275 | tags=43%, list=31%, signal=62%  |
| REACTION_METABOLISM_OF_LIPIDS_AND_LIPOPROTEINS                     | 337 | 0.8455833  | -0.194183  | -0.9081543 | 0.6183036  | 1     | 2369 | tags=24%, list=23%, signal=30%  |
| BIOCARTA_NO1_PATHWAY                                               | 27  | 0.84567845 | -0.3031953 | -0.9249924 | 0.5534591  | 1     | 1489 | tags=22%, list=14%, signal=26%  |
| ST_GA13_PATHWAY                                                    | 35  | 0.84571177 | -0.2628838 | -0.9322131 | 0.5532359  | 1     | 2660 | tags=43%, list=26%, signal=57%  |
| KEGG_AMYOTROPHIC_LATERAL_SCLEROSIS_ALS                             | 48  | 0.8458646  | -0.2467248 | -0.9533057 | 0.50110376 | 1     | 2660 | tags=31%, list=26%, signal=42%  |
| KEGG_NATURAL_KILLER_CELL_MEDIATED_CYTOTOXICITY                     | 100 | 0.84607834 | -0.2617011 | -0.9381428 | 0.4790287  | 1     | 3321 | tags=46%, list=32%, signal=67%  |
| ST_INTEGRIN_SIGNALING_PATHWAY                                      | 74  | 0.84623253 | -0.246089  | -0.9418344 | 0.55314535 | 1     | 2342 | tags=35%, list=22%, signal=45%  |
| KEGG_REGULATION_OF_ACTIN_CYTOSKELETON                              | 175 | 0.8463982  | -0.2230341 | -0.9567232 | 0.5155131  | 1     | 1740 | tags=22%, list=17%, signal=26%  |
| PID_TOLL_ENDOGENOUS_PATHWAY                                        | 21  | 0.84649694 | -0.3000286 | -0.9053324 | 0.54385966 | 1     | 2395 | tags=38%, list=23%, signal=49%  |
| PID_ILK_PATHWAY                                                    | 41  | 0.84657264 | -0.2789894 | -0.9555167 | 0.51918733 | 1     | 1580 | tags=34%, list=15%, signal=40%  |
| PID_THROMBIN_PAR1_PATHWAY                                          | 40  | 0.8466266  | -0.2640012 | -0.9016021 | 0.58719647 | 1     | 2798 | tags=40%, list=27%, signal=54%  |
| PID_CONE_PATHWAY                                                   | 15  | 0.8472407  | -0.3182351 | -0.9426193 | 0.53539824 | 1     | 3723 | tags=40%, list=36%, signal=62%  |
| BIOCARTA_FCE1R_PATHWAY                                             | 33  | 0.8483106  | -0.2653437 | -0.9250178 | 0.5472103  | 1     | 2499 | tags=36%, list=24%, signal=48%  |
| REACTION_NUCLEOTIDE_BINDING_DOMAIN_LEUCINE_RICH_REPEAT_CONTAIN     | 39  | 0.8483766  | -0.2783966 | -0.9322398 | 0.536643   | 1     | 1224 | tags=26%, list=12%, signal=29%  |
| BIOCARTA_CDMAC_PATHWAY                                             | 15  | 0.84860563 | -0.3318281 | -0.9261069 | 0.575      | 1     | 3214 | tags=47%, list=31%, signal=67%  |
| BIOCARTA_SPRY_PATHWAY                                              | 16  | 0.8486662  | -0.3313404 | -0.953337  | 0.50959486 | 1     | 570  | tags=19%, list=5%, signal=20%   |
| REACTION_POTASSIUM_CHANNELS                                        | 74  | 0.8488321  | -0.2191492 | -0.9017496 | 0.63744074 | 1     | 3546 | tags=39%, list=34%, signal=59%  |
| PID_ER_NONGENOMIC_PATHWAY                                          | 37  | 0.8489731  | -0.2635498 | -0.9271921 | 0.5704698  | 1     | 704  | tags=19%, list=7%, signal=20%   |
| KEGG_MTOR_SIGNALING_PATHWAY                                        | 45  | 0.8501215  | -0.2493389 | -0.9278725 | 0.5638766  | 1     | 2221 | tags=33%, list=21%, signal=42%  |
| KEGG_PORPHYRIN_AND_CHLOROPHYLL_METABOLISM                          | 47  | 0.8502041  | -0.2818743 | -0.8975322 | 0.5978495  | 1     | 47   | tags=8%, list=0%, signal=8%     |
| BIOCARTA_DEATH_PATHWAY                                             | 31  | 0.85040045 | -0.2889435 | -0.9325368 | 0.5251641  | 1     | 1561 | tags=26%, list=15%, signal=30%  |
| KEGG_BLADDER_CANCER                                                | 41  | 0.85073084 | -0.2384404 | -0.8936956 | 0.64665127 | 1     | 1037 | tags=20%, list=10%, signal=22%  |
| BIOCARTA_COMP_PATHWAY                                              | 15  | 0.8508684  | -0.663784  | -1.6095276 | 0.04233871 | 0.97  | 2609 | tags=67%, list=25%, signal=89%  |
| REACTION_GPVI_MEDIATED_ACTIVATION_CASCADE                          | 28  | 0.85088086 | -0.3040868 | -0.8959767 | 0.61276597 | 1     | 3269 | tags=54%, list=31%, signal=78%  |
| KEGG_BASAL_CELL_CARCINOMA                                          | 45  | 0.85133517 | -0.2569885 | -0.8981942 | 0.59325844 | 1     | 3802 | tags=53%, list=37%, signal=84%  |
| KEGG_LYSOSOME                                                      | 105 | 0.8515835  | -0.2548508 | -0.928525  | 0.5327869  | 1     | 2106 | tags=28%, list=20%, signal=34%  |
| REACTION_PEPTIDE_LIGAND_BINDING_RECEPTORS                          | 137 | 0.85303634 | -0.3693899 | -1.6177405 | 0.01842105 | 0.966 | 4170 | tags=53%, list=40%, signal=88%  |
| PID_IL8CXCR2_PATHWAY                                               | 30  | 0.85315186 | -0.2863555 | -0.8937427 | 0.5661605  | 1     | 867  | tags=20%, list=8%, signal=22%   |
| KEGG_PRIMARY_IMMUNODEFICIENCY                                      | 33  | 0.85733056 | -0.3598633 | -0.8869084 | 0.57743365 | 1     | 4004 | tags=70%, list=38%, signal=113% |
| KEGG_CHRONIC_MYELOID_LEUKEMIA                                      | 70  | 0.85742617 | -0.217252  | -0.8833835 | 0.6849642  | 1     | 2335 | tags=29%, list=22%, signal=37%  |
| PID_TCRALCIUMPATHWAY                                               | 26  | 0.8574835  | -0.2874176 | -0.8879463 | 0.60227275 | 1     | 3496 | tags=46%, list=34%, signal=69%  |
| BIOCARTA_PML_PATHWAY                                               | 16  | 0.85839295 | -0.3070179 | -0.8852419 | 0.5879733  | 1     | 1897 | tags=25%, list=18%, signal=31%  |
| BIOCARTA_ERK_PATHWAY                                               | 26  | 0.8587908  | -0.2585931 | -0.883898  | 0.6347826  | 1     | 2221 | tags=35%, list=21%, signal=44%  |
| REACTION_SPHINGOLIPID_DE_NOVO_BIOSYNTHESIS                         | 17  | 0.8595972  | -0.3102311 | -0.8881308 | 0.6028226  | 1     | 1503 | tags=29%, list=14%, signal=34%  |
| REACTION_NCAM_SIGNALING_FOR_NEURITE_OUT_GROWTH                     | 62  | 0.8629119  | -0.2320163 | -0.8797324 | 0.60264903 | 1     | 2414 | tags=29%, list=23%, signal=38%  |
| REACTION_COMPLEMENT_CASCADE                                        | 26  | 0.8639752  | -0.6039639 | -1.6257403 | 0.0545809  | 0.961 | 2609 | tags=58%, list=25%, signal=71%  |
| KEGG_APOPTOSIS                                                     | 76  | 0.86542046 | -0.2265883 | -0.8714653 | 0.63380283 | 1     | 3269 | tags=42%, list=31%, signal=67%  |
| PID_TCFP_PATHWAY                                                   | 39  | 0.86724305 | -0.2637924 | -0.8742352 | 0.6289593  | 1     | 2144 | tags=33%, list=21%, signal=42%  |
| PID_RXR_VDR_PATHWAY                                                | 24  | 0.86728007 | -0.537609  | -1.6344352 | 0.02850877 | 0.955 | 1295 | tags=38%, list=12%, signal=43%  |
| KEGG_AMINO_SUGAR_AND_NUCLEOTIDE_SUGAR_METABOLISM                   | 35  | 0.8673131  | -0.2743956 | -0.8680266 | 0.6048035  | 1     | 3685 | tags=54%, list=35%, signal=84%  |
| REACTION_REGULATION_OF_INSULIN_SECRETION_BY_GLUCCAGON LIKE PEPTIDE | 33  | 0.8676135  | -0.2527525 | -0.8752912 | 0.67170626 | 1     | 2123 | tags=27%, list=20%, signal=34%  |
| PID_LYSOPHOSPHOLIPID_PATHWAY                                       | 54  | 0.8677173  | -0.2346007 | -0.8715528 | 0.667426   | 1     | 1951 | tags=31%, list=19%, signal=39%  |
| REACTION_FORMATION_OF_INCISION_COMPLEX_IN_GG_NER                   | 17  | 0.86775887 | -0.3166638 | -0.8764533 | 0.6352201  | 1     | 1000 | tags=29%, list=10%, signal=32%  |
| PID_INTEGRIN3_PATHWAY                                              | 42  | 0.8686896  | -0.2859922 | -0.8722771 | 0.5708245  | 1     | 3150 | tags=45%, list=30%, signal=65%  |
| WNT_SIGNALING                                                      | 79  | 0.8690371  | -0.1979735 | -0.8684349 | 0.69859815 | 1     | 1389 | tags=18%, list=13%, signal=20%  |
| BIOCARTA_MET_PATHWAY                                               | 34  | 0.8708353  | -0.2576326 | -0.8482782 | 0.6717391  | 1     | 1951 | tags=29%, list=19%, signal=36%  |
| REACTION_PI3K_CASCADE                                              | 55  | 0.8716805  | -0.2315062 | -0.8575078 | 0.66146994 | 1     | 1881 | tags=25%, list=18%, signal=31%  |
| PID_ECADHERIN_STABILIZATION_PATHWAY                                | 39  | 0.8724881  | -0.2497729 | -0.8594376 | 0.6441441  | 1     | 1405 | tags=23%, list=13%, signal=27%  |
| REACTION_IL_2_SIGNALING                                            | 37  | 0.8725593  | -0.2507931 | -0.848626  | 0.6264237  | 1     | 3275 | tags=41%, list=31%, signal=59%  |
| KEGG_NOTCH_SIGNALING_PATHWAY                                       | 35  | 0.87271297 | -0.2522022 | -0.8617312 | 0.6739606  | 1     | 1663 | tags=20%, list=16%, signal=24%  |
| PID_TCR_PATHWAY                                                    | 55  | 0.87289435 | -0.28518   | -0.8604185 | 0.5804348  | 1     | 3166 | tags=44%, list=30%, signal=62%  |
| KEGG_TIGHT_JUNCTION                                                | 110 | 0.87307554 | -0.2057253 | -0.8459051 | 0.7028302  | 1     | 2754 | tags=27%, list=26%, signal=37%  |
| REACTION_NRAGE_SIGNALS_DEATH_THROUGH_JNK                           | 34  | 0.87308574 | -0.2519101 | -0.8639572 | 0.6630901  | 1     | 1874 | tags=32%, list=18%, signal=39%  |
| REACTION_NUCLEAR_EVENTS_KINASE_AND_TRANSCRIPTION_FACTOR_ACTIVATION | 23  | 0.8734688  | -0.2794221 | -0.8578283 | 0.645749   | 1     | 2221 | tags=35%, list=21%, signal=44%  |
| KEGG_DORSO_VENTRAL_AXIS_FORMATION                                  | 18  | 0.8736996  | -0.2948175 | -0.862462  | 0.6516854  | 1     | 529  | tags=11%, list=5%, signal=12%   |
| PID_ARF6_TRAFFICKINGPATHWAY                                        | 42  | 0.8744308  | -0.2524337 | -0.8488732 | 0.65367967 | 1     | 1098 | tags=19%, list=11%, signal=21%  |
| REACTION_INFLUENZA_LIFE_CYCLE                                      | 111 | 0.87569356 | -0.2978115 | -0.8530542 | 0.57988167 | 1     | 2186 | tags=46%, list=21%, signal=58%  |
| REACTION_MAPK_TARGETS_NUCLEAR_EVENTS_MEDIATED_BY_MAP_KINASES       | 29  | 0.8758716  | -0.2755022 | -0.8505265 | 0.6625259  | 1     | 2307 | tags=38%, list=22%, signal=49%  |
| KEGG_FC_EPSILON_RI_SIGNALING_PATHWAY                               | 69  | 0.87600034 | -0.2119465 | -0.8492843 | 0.676815   | 1     | 2707 | tags=33%, list=26%, signal=45%  |
| KEGG_RIG_I LIKE_RECEPTOR_SIGNALING_PATHWAY                         | 57  | 0.87666696 | -0.2314503 | -0.8513619 | 0.6840796  | 1     | 2335 | tags=25%, list=22%, signal=31%  |
| REACTION_PHASE_II_CONJUGATION                                      | 42  | 0.87776166 | -0.2363555 | -0.853235  | 0.67777777 | 1     | 2316 | tags=24%, list=22%, signal=30%  |
| BIOCARTA_CERAMIDE_PATHWAY                                          | 21  | 0.8796559  | -0.2642168 | -0.8413958 | 0.7058824  | 1     | 2019 | tags=29%, list=19%, signal=35%  |
| REACTION_GLUCCAGON_SIGNALING_IN_METABOLIC_REGULATION               | 23  | 0.89584607 | -0.2551906 | -0.8306493 | 0.6982379  | 1     | 1195 | tags=17%, list=11%, signal=20%  |
| REACTION_METABOLISM_OF_VITAMINS_AND_COFACTORS                      | 43  | 0.8960755  | -0.2395864 | -0.828     | 0.71365637 | 1     | 2021 | tags=30%, list=19%, signal=37%  |
| REACTION_FORMATION_OF_FIBRIN_CLOT_CLOTTING_CASCADE                 | 30  | 0.8975632  | -0.5795682 | -1.675572  | 0.03155819 | 0.903 | 4207 | tags=90%, list=40%, signal=151% |
| REACTION_INSULIN_RECEPTOR_SIGNALING_CASCADE                        | 69  | 0.897564   | -0.2095125 | -0.8310301 | 0.75116277 | 1     | 1513 | tags=20%, list=15%, signal=24%  |
| SA_B_CELL_RECEPTOR_COMPLEXES                                       | 21  | 0.89843583 | -0.2659849 | -0.8280084 | 0.6967742  | 1     | 3053 | tags=38%, list=29%, signal=54%  |
| REACTION_GENERATION_OF_SECOND_MESSENGER_MOLECULES                  | 21  | 0.90269434 | -0.3627673 | -0.8182864 | 0.6498952  | 1     | 3397 | tags=62%, list=33%, signal=92%  |
| PID_DELTANP63PATHWAY                                               | 44  | 0.9041403  | -0.2226505 | -0.8187978 | 0.75488067 | 1     | 3285 | tags=50%, list=32%, signal=73%  |
| PID_CMYB_PATHWAY                                                   | 76  | 0.9052415  | -0.1872068 | -0.8194786 | 0.82474226 | 1     | 1739 | tags=18%, list=17%, signal=22%  |
| BIOCARTA_IL12_PATHWAY                                              | 20  | 0.90659326 | -0.3362388 | -0.8200716 | 0.65957445 | 1     | 3022 | tags=55%, list=29%, signal=77%  |
| REACTION_GPCR_LIGAND_BINDING                                       | 291 | 0.90797067 | -0.364002  | -1.720772  | 0          | 0.836 | 3904 | tags=50%, list=38%, signal=78%  |
| BIOCARTA_CXCR4_PATHWAY                                             | 21  | 0.90831935 | -0.2738144 | -0.8204617 | 0.68973213 | 1     | 2139 | tags=33%, list=21%, signal=42%  |
| REACTION_IL1_SIGNALING                                             | 32  | 0.9102584  | -0.2236197 | -0.8066441 | 0.772093   | 1     | 2564 | tags=34%, list=25%, signal=45%  |
| REACTION_ACTIVATION_OF_KAINATE_RECEPTORS_UPON_GLUCCAMATE_BINDING   | 24  | 0.910292   | -0.2368686 | -0.8053232 | 0.78539824 | 1     | 919  | tags=17%, list=9%, signal=18%   |

|                                                                            |     |            |            |            |            |   |      |                                  |
|----------------------------------------------------------------------------|-----|------------|------------|------------|------------|---|------|----------------------------------|
| BIOCARTA_MCALPAIN_PATHWAY                                                  | 21  | 0.9114232  | -0.2607919 | -0.812428  | 0.71157897 | 1 | 3182 | tags=43%, list=31%, signal=62%   |
| KEGG_ALDOSTERONE_REGULATED_SODIUM_REABSORPTION                             | 37  | 0.91191363 | -0.2204582 | -0.8108473 | 0.74115044 | 1 | 1944 | tags=24%, list=19%, signal=30%   |
| REACTOME_METABOLISM_OF_STEROID_HORMONES_AND_VITAMINS_A_AND_PID_HNF3BPATWAY | 27  | 0.91193104 | -0.2542136 | -0.8005502 | 0.6987448  | 1 | 4325 | tags=44%, list=42%, signal=76%   |
| REACTOME_NEURONAL_SYSTEM                                                   | 228 | 0.9120612  | -0.1663952 | -0.8069708 | 0.8544974  | 1 | 868  | tags=11%, list=8%, signal=12%    |
| REACTOME_THROMBOXANE_SIGNALING_THROUGH_TP_RECEPTOR                         | 17  | 0.9121329  | -0.263698  | -0.8016909 | 0.7286013  | 1 | 2798 | tags=47%, list=27%, signal=64%   |
| PID_TGFBPRTWAY                                                             | 48  | 0.91290903 | -0.2286222 | -0.8076756 | 0.76537585 | 1 | 1850 | tags=25%, list=18%, signal=30%   |
| BIOCARTA_ECM_PATHWAY                                                       | 23  | 0.91366506 | -0.2652655 | -0.8021703 | 0.72863245 | 1 | 2144 | tags=30%, list=21%, signal=38%   |
| BIOCARTA_RAS_PATHWAY                                                       | 23  | 0.91506875 | -0.2397107 | -0.7872323 | 0.7995825  | 1 | 1881 | tags=26%, list=18%, signal=32%   |
| REACTOME_PI3K_AKT_ACTIVATION                                               | 29  | 0.9151568  | -0.2449474 | -0.7923644 | 0.7827004  | 1 | 2665 | tags=34%, list=26%, signal=46%   |
| REACTOME_AMINO_ACID_AND_OLIGOPEPTIDE_SLC_TRANSPORTERS                      | 36  | 0.915643   | -0.2169165 | -0.7895333 | 0.7687366  | 1 | 1825 | tags=17%, list=18%, signal=20%   |
| REACTOME_METABOLISM_OF_PROTEINS                                            | 311 | 0.9163401  | -0.2143652 | -0.785048  | 0.6855346  | 1 | 2186 | tags=27%, list=21%, signal=34%   |
| KEGG_ANTIGEN_PROCESSING_AND_PRESENTATION                                   | 59  | 0.9165248  | -0.2681644 | -0.7967826 | 0.6578366  | 1 | 2106 | tags=29%, list=20%, signal=36%   |
| REACTOME_TRAF6_MEDIATED_NFKB_ACTIVATION                                    | 17  | 0.91665167 | -0.2739216 | -0.7902317 | 0.7213483  | 1 | 3259 | tags=53%, list=31%, signal=77%   |
| PID_CD8TRCPATWAY                                                           | 45  | 0.9170343  | -0.2690224 | -0.7926197 | 0.6514161  | 1 | 3166 | tags=44%, list=30%, signal=64%   |
| REACTOME_TIE2_SIGNALING                                                    | 15  | 0.9172243  | -0.2636151 | -0.7873167 | 0.7355555  | 1 | 2144 | tags=33%, list=21%, signal=42%   |
| PID_RAC1_REG_PATHWAY                                                       | 27  | 0.9179706  | -0.2400304 | -0.793404  | 0.76374745 | 1 | 2668 | tags=37%, list=26%, signal=50%   |
| BIOCARTA_UCALPAIN_PATHWAY                                                  | 15  | 0.9184573  | -0.2994397 | -0.7944216 | 0.7106918  | 1 | 2506 | tags=33%, list=24%, signal=44%   |
| REACTOME_FATTY_ACID_TRIACYLGLYCEROL_AND_KETONE_BODY_METABOLISM             | 117 | 0.9200419  | -0.2004382 | -0.7789723 | 0.79303277 | 1 | 2094 | tags=24%, list=20%, signal=30%   |
| REACTOME_SIGNALING_BY_ERBB2                                                | 81  | 0.9217407  | -0.1848334 | -0.7793381 | 0.89376444 | 1 | 2144 | tags=25%, list=21%, signal=31%   |
| PID_INSULIN_PATHWAY                                                        | 38  | 0.92206615 | -0.2186012 | -0.7698088 | 0.81838566 | 1 | 1130 | tags=16%, list=11%, signal=18%   |
| REACTOME_COSTIMULATION_BY_THE_CD28_FAMILY                                  | 51  | 0.9227463  | -0.2412708 | -0.7653666 | 0.6880342  | 1 | 2786 | tags=39%, list=27%, signal=53%   |
| PID_IL8CXCR1_PATHWAY                                                       | 24  | 0.9230323  | -0.2584166 | -0.7718431 | 0.7334755  | 1 | 867  | tags=17%, list=8%, signal=18%    |
| ST_GRANULE_CELL_SURVIVAL_PATHWAY                                           | 25  | 0.9232113  | -0.2434394 | -0.7798163 | 0.80124223 | 1 | 2307 | tags=36%, list=22%, signal=46%   |
| SIG_IL4RECEPTOR_IN_B_LYMPHOCYTES                                           | 26  | 0.9237592  | -0.2312474 | -0.7701761 | 0.82765955 | 1 | 2532 | tags=35%, list=24%, signal=46%   |
| BIOCARTA_NGF_PATHWAY                                                       | 16  | 0.9239227  | -0.2579828 | -0.7727184 | 0.80982906 | 1 | 696  | tags=19%, list=7%, signal=20%    |
| REACTOME_INWARDLY_RECTIFYING_K_CHANNELS                                    | 26  | 0.9242301  | -0.2214455 | -0.7658498 | 0.82742316 | 1 | 3546 | tags=46%, list=34%, signal=70%   |
| REACTOME_ANTIGEN_ACTIVATES_B_CELL_RECEPTOR_LEADING_TO_GENERATIC            | 24  | 0.9246555  | -0.283568  | -0.7600411 | 0.72077924 | 1 | 3289 | tags=46%, list=32%, signal=67%   |
| BIOCARTA_BAD_PATHWAY                                                       | 24  | 0.92490363 | -0.224071  | -0.7612559 | 0.8189655  | 1 | 3269 | tags=42%, list=31%, signal=61%   |
| REACTOME_GAB1_SIGNALOSOME                                                  | 29  | 0.9257987  | -0.2245514 | -0.7662417 | 0.84309626 | 1 | 2125 | tags=28%, list=20%, signal=35%   |
| REACTOME_HS_GAG_BIOSYNTHESIS                                               | 22  | 0.9259302  | -0.2577494 | -0.7728652 | 0.7576419  | 1 | 2550 | tags=32%, list=24%, signal=42%   |
| REACTOME_PYRIMIDINE_METABOLISM                                             | 18  | 0.9260641  | -0.2623103 | -0.7578114 | 0.75946546 | 1 | 1858 | tags=33%, list=18%, signal=41%   |
| KEGG_TASTE_TRANSDUCTION                                                    | 30  | 0.9260913  | -0.2252519 | -0.7741349 | 0.7644445  | 1 | 2123 | tags=20%, list=20%, signal=25%   |
| KEGG_HEDGEHOG_SIGNALING_PATHWAY                                            | 44  | 0.92660356 | -0.2067272 | -0.7615849 | 0.82570803 | 1 | 954  | tags=14%, list=9%, signal=15%    |
| ST_JNK_MAPK_PATHWAY                                                        | 36  | 0.927082   | -0.233918  | -0.7557196 | 0.8103093  | 1 | 2912 | tags=47%, list=28%, signal=65%   |
| REACTOME_GABA_RECEPTOR_ACTIVATION                                          | 44  | 0.927162   | -0.1938726 | -0.7542377 | 0.8621554  | 1 | 2282 | tags=23%, list=22%, signal=29%   |
| KEGG_PYRUVATE_METABOLISM                                                   | 33  | 0.93135095 | -0.243309  | -0.741357  | 0.7668067  | 1 | 886  | tags=15%, list=9%, signal=17%    |
| BIOCARTA_ERK5_PATHWAY                                                      | 17  | 0.9323303  | -0.2342049 | -0.7179873 | 0.8658281  | 1 | 3269 | tags=47%, list=31%, signal=68%   |
| REACTOME_INHIBITION_OF_VOLTAGE_GATED_CA2_CHANNELS_VIA_GBETA_GA             | 21  | 0.9326798  | -0.2215418 | -0.7192656 | 0.86946366 | 1 | 2282 | tags=29%, list=22%, signal=37%   |
| KEGG_REGULATION_OF_AUTOPHAGY                                               | 24  | 0.93335867 | -0.2257549 | -0.7414528 | 0.8237886  | 1 | 1778 | tags=17%, list=17%, signal=20%   |
| REACTOME_TAK1_ACTIVATES_NFKB_BY_PHOSPHORYLATION_AND_ACTIVATION             | 18  | 0.93366975 | -0.2472621 | -0.7248859 | 0.81006867 | 1 | 2484 | tags=39%, list=24%, signal=51%   |
| BIOCARTA_NOS1_PATHWAY                                                      | 18  | 0.933929   | -0.2414157 | -0.7262019 | 0.8270042  | 1 | 41   | tags=6%, list=0%, signal=6%      |
| KEGG_CYTOSOLIC_DNA_SENSING_PATHWAY                                         | 39  | 0.9340401  | -0.226408  | -0.7439335 | 0.797235   | 1 | 2515 | tags=31%, list=24%, signal=40%   |
| KEGG_STARCH_AND_SUCROSE_METABOLISM                                         | 27  | 0.9341513  | -0.2168942 | -0.7197501 | 0.83516484 | 1 | 3071 | tags=37%, list=30%, signal=52%   |
| KEGG_GALACTOSE_METABOLISM                                                  | 22  | 0.9345854  | -0.2486992 | -0.7479173 | 0.7523148  | 1 | 3612 | tags=50%, list=35%, signal=76%   |
| REACTOME_BRANCHED_CHAIN_AMINO_ACID_CATABOLISM                              | 16  | 0.93499464 | -0.2886764 | -0.7447648 | 0.7286528  | 1 | 2418 | tags=31%, list=23%, signal=41%   |
| BIOCARTA_MTA3_PATHWAY                                                      | 17  | 0.9351801  | -0.2646928 | -0.7411724 | 0.77021277 | 1 | 1706 | tags=24%, list=16%, signal=28%   |
| REACTOME_TRIGLYCERIDE_BIOSYNTHESIS                                         | 25  | 0.93526876 | -0.2421194 | -0.7268415 | 0.81996083 | 1 | 2472 | tags=32%, list=24%, signal=42%   |
| ST_T_CELL_SIGNAL_TRANSDUCTION                                              | 41  | 0.9358804  | -0.2332192 | -0.7216036 | 0.7461707  | 1 | 3181 | tags=41%, list=31%, signal=59%   |
| REACTOME_THE_ROLE_OF_NEF_IN_HIV1_REPLICATION_AND_DISEASE_PATHOC            | 25  | 0.9361126  | -0.2541056 | -0.7198715 | 0.79253113 | 1 | 2779 | tags=48%, list=27%, signal=65%   |
| REACTOME_IL_RECEPTOR_SHC_SIGNALING                                         | 24  | 0.936702   | -0.2478649 | -0.7451422 | 0.7626728  | 1 | 3275 | tags=42%, list=31%, signal=61%   |
| PID_P3ALPHAETAPATHWAY                                                      | 28  | 0.9371023  | -0.230796  | -0.7270299 | 0.85809314 | 1 | 2779 | tags=39%, list=27%, signal=53%   |
| PID_ENDOTHELINPATHWAY                                                      | 55  | 0.9372779  | -0.1976213 | -0.7312968 | 0.8551724  | 1 | 2809 | tags=33%, list=27%, signal=45%   |
| PID_BCR_PATHWAY                                                            | 58  | 0.93728626 | -0.2044829 | -0.7126021 | 0.8333333  | 1 | 3289 | tags=43%, list=32%, signal=63%   |
| KEGG_T_CELL_RECEPTOR_SIGNALING_PATHWAY                                     | 99  | 0.93834037 | -0.19849   | -0.7290935 | 0.74613684 | 1 | 3275 | tags=43%, list=31%, signal=63%   |
| REACTOME_EFFECTS_OF_PIP2_HYDROLYSIS                                        | 20  | 0.93865806 | -0.2352684 | -0.7274043 | 0.81978023 | 1 | 1290 | tags=20%, list=12%, signal=23%   |
| REACTOME_NOTCH1_INTRACELLULAR_DOMAIN_REGULATES_TRANSCRIPTION               | 33  | 0.93911874 | -0.2023028 | -0.7095335 | 0.91206545 | 1 | 2209 | tags=24%, list=21%, signal=31%   |
| PID_CXCR3PATHWAY                                                           | 39  | 0.93933916 | -0.2084985 | -0.7313793 | 0.8495575  | 1 | 1908 | tags=23%, list=18%, signal=28%   |
| SIG_BCR_SIGNALING_PATHWAY                                                  | 43  | 0.94018584 | -0.211385  | -0.7323517 | 0.8098434  | 1 | 3086 | tags=37%, list=30%, signal=53%   |
| PID_S1P_S1P1_PATHWAY                                                       | 20  | 0.94091296 | -0.251104  | -0.7334334 | 0.80827886 | 1 | 2506 | tags=35%, list=24%, signal=46%   |
| ST_MYOCYTE_AD_PATHWAY                                                      | 25  | 0.94405246 | -0.2085266 | -0.6955357 | 0.8736617  | 1 | 2579 | tags=24%, list=25%, signal=32%   |
| BIOCARTA_IGF1_PATHWAY                                                      | 20  | 0.94537437 | -0.2241678 | -0.6925491 | 0.89135253 | 1 | 2144 | tags=30%, list=21%, signal=38%   |
| REACTOME_GRB2_EVENTS_IN_ERBB2_SIGNALING                                    | 19  | 0.94552916 | -0.2126532 | -0.6960376 | 0.8818381  | 1 | 1109 | tags=16%, list=11%, signal=18%   |
| BIOCARTA_GSK3_PATHWAY                                                      | 25  | 0.9462984  | -0.2013658 | -0.6845325 | 0.92699116 | 1 | 3214 | tags=48%, list=31%, signal=69%   |
| BIOCARTA_P53HYPOXIA_PATHWAY                                                | 21  | 0.9466769  | -0.2106245 | -0.6766778 | 0.8960177  | 1 | 2909 | tags=43%, list=28%, signal=59%   |
| KEGG_TYPE_II_DIABETES_MELLITUS                                             | 42  | 0.9468157  | -0.1847407 | -0.6967455 | 0.9304556  | 1 | 2953 | tags=38%, list=28%, signal=53%   |
| REACTOME_REGULATION_OF_BETA_CELL_DEVELOPMENT                               | 23  | 0.9470427  | -0.207876  | -0.7017182 | 0.8517699  | 1 | 8251 | tags=100%, list=79%, signal=481% |
| REACTOME_SHC1_EVENTS_IN_ERBB4_SIGNALING                                    | 17  | 0.9474164  | -0.1922244 | -0.6854363 | 0.902439   | 1 | 1109 | tags=18%, list=11%, signal=20%   |
| PID_SYNDACAN_4_PATHWAY                                                     | 30  | 0.9480903  | -0.2105038 | -0.6866368 | 0.8912037  | 1 | 3558 | tags=43%, list=34%, signal=66%   |
| REACTOME_RIG_I_MDA5_MEDIATED_INDUCION_OF_IFN_ALPHA_BETA_PATH               | 57  | 0.9481303  | -0.1912411 | -0.6885014 | 0.9199029  | 1 | 3259 | tags=37%, list=31%, signal=53%   |
| PID_HIF1APATHWAY                                                           | 17  | 0.9481547  | -0.2420046 | -0.6973361 | 0.875      | 1 | 1835 | tags=29%, list=18%, signal=36%   |
| PID_TRAIL_PATHWAY                                                          | 26  | 0.94863594 | -0.2040997 | -0.6690456 | 0.92671394 | 1 | 2150 | tags=31%, list=21%, signal=39%   |
| REACTOME_TRANSPORT_OF_INORGANIC_CATIONS_ANIONS_AND_AMINO_ACID              | 70  | 0.94865775 | -0.1661293 | -0.6767668 | 0.9530516  | 1 | 2857 | tags=23%, list=27%, signal=31%   |
| REACTOME_SIGNAL_TRANSDUCTION_BY_L1                                         | 32  | 0.9491183  | -0.1954028 | -0.670515  | 0.93492407 | 1 | 2506 | tags=28%, list=24%, signal=37%   |
| PID_IGF1_PATHWAY                                                           | 27  | 0.94921404 | -0.1937982 | -0.6563926 | 0.9375     | 1 | 2144 | tags=26%, list=21%, signal=33%   |
| REACTOME_ADP_SIGNALING_THROUGH_P2RY1                                       | 19  | 0.9492838  | -0.2167529 | -0.6722645 | 0.9076577  | 1 | 2798 | tags=37%, list=27%, signal=50%   |
| BIOCARTA_RAC1_PATHWAY                                                      | 22  | 0.9494484  | -0.2029791 | -0.677978  | 0.9113082  | 1 | 2463 | tags=32%, list=24%, signal=42%   |
| REACTOME_SULFUR_AMINO_ACID_METABOLISM                                      | 23  | 0.94977486 | -0.2057504 | -0.6537615 | 0.9277344  | 1 | 2246 | tags=26%, list=22%, signal=33%   |
| BIOCARTA_BCR_PATHWAY                                                       | 29  | 0.94978505 | -0.2070373 | -0.679602  | 0.8924731  | 1 | 2499 | tags=31%, list=24%, signal=41%   |
| PID_EPHA_FWDPATHWAY                                                        | 29  | 0.94989383 | -0.2014131 | -0.6577751 | 0.90084386 | 1 | 1435 | tags=17%, list=14%, signal=20%   |
| REACTOME_OXYGEN_DEPENDENT_PROLINE_HYDROXYLATION_OF_HYPOXIA_IN              | 15  | 0.95021623 | -0.2667204 | -0.6973922 | 0.8390558  | 1 | 2015 | tags=40%, list=19%, signal=50%   |
| PID_HES_HEYHPATHWAY                                                        | 43  | 0.9506418  | -0.1823317 | -0.6651651 | 0.9510638  | 1 | 2623 | tags=26%, list=25%, signal=34%   |
| BIOCARTA_TFF_PATHWAY                                                       | 20  | 0.9507958  | -0.2033348 | -0.6588964 | 0.92763156 | 1 | 2144 | tags=30%, list=21%, signal=38%   |
| REACTOME_NEGATIVE_REGULATORS_OF_RIG_I_MDA5_SIGNALING                       | 24  | 0.95168227 | -0.2157249 | -0.6600692 | 0.88666666 | 1 | 2015 | tags=25%, list=19%, signal=31%   |
| PID_ARF_3PATHWAY                                                           | 15  | 0.95247334 | -0.2423787 | -0.6613175 | 0.87598425 | 1 | 1326 | tags=20%, list=13%, signal=23%   |
| BIOCARTA_PTEIN_PATHWAY                                                     | 16  | 0.95266937 | -0.2181297 | -0.635584  | 0.91935486 | 1 | 129  | tags=6%, list=1%, signal=6%      |
| PID_RHODOPSPIN_PATHWAY                                                     | 19  | 0.95621455 | -0.1951436 | -0.6309617 | 0.95248866 | 1 | 2013 | tags=21%, list=19%, signal=26%   |
| KEGG_LINOLEIC_ACID_METABOLISM                                              | 23  | 0.95707935 | -0.198527  | -0.6226802 | 0.93110645 | 1 | 4408 | tags=52%, list=42%, signal=90%   |
| BIOCARTA_INSULIN_PATHWAY                                                   | 21  | 0.95710015 | -0.2000443 | -0.6232228 | 0.9211712  | 1 | 2144 | tags=29%, list=21%, signal=36%   |
| REACTOME_ACTIVATED_NOTCH1_TRANSMITS_SIGNAL_TO_THE_NUCLEUS                  | 20  | 0.9571343  | -0.1952244 | -0.625012  | 0.9591837  | 1 | 2794 | tags=35%, list=25%, signal=48%   |
| REACTOME_STRIATED_MUSCLE_CONTRACTION                                       | 25  | 0.9578429  | -0.3053432 | -0.6265854 | 0.86919105 | 1 | 1830 | tags=16%, list=18%, signal=19%   |
| PID_CD8TRCDOWNSTREAMPATHWAY                                                | 52  | 0.9581869  | -0.1939712 | -0.6355928 | 0.8648649  | 1 | 1072 | tags=13%, list=10%, signal=15%   |
| PID_IFNGPATHWAY                                                            | 35  | 0.9585084  | -0.1948642 | -0.6399235 | 0.9152174  | 1 | 1881 | tags=20%, list=18%, signal=24%   |

|                                                                |     |            |            |            |            |       |      |                                  |
|----------------------------------------------------------------|-----|------------|------------|------------|------------|-------|------|----------------------------------|
| KEGG_ALZHEIMERS_DISEASE                                        | 138 | 0.95918393 | -0.1797653 | -0.6368494 | 0.89375    | 1     | 2706 | tags=28%, list=26%, signal=37%   |
| REACTOME_REGULATION_OF_GENE_EXPRESSION_IN_BETA_CELLS           | 17  | 0.95933557 | -0.207756  | -0.6412056 | 0.8983402  | 1     | 8251 | tags=100%, list=79%, signal=482% |
| PID_IL2_STATS_PATHWAY                                          | 29  | 0.95966154 | -0.2016904 | -0.6167361 | 0.9111111  | 1     | 2803 | tags=31%, list=27%, signal=42%   |
| PID_EPHRINBREV_PATHWAY                                         | 30  | 0.960137   | -0.1901631 | -0.6131424 | 0.9497717  | 1     | 2779 | tags=33%, list=27%, signal=45%   |
| REACTOME_RESPIRATORY_ELECTRON_TRANSPORT                        | 55  | 0.9601756  | -0.2517833 | -0.6103226 | 0.8156313  | 1     | 2694 | tags=31%, list=26%, signal=41%   |
| BIOCARTA_HER2_PATHWAY                                          | 19  | 0.96026635 | -0.2052863 | -0.6016363 | 0.94065934 | 1     | 2144 | tags=26%, list=21%, signal=33%   |
| PID_HNF3A_PATHWAY                                              | 36  | 0.9609799  | -0.1730916 | -0.6035193 | 0.94866073 | 1     | 696  | tags=8%, list=7%, signal=9%      |
| KEGG_OLFACTORY_TRANSDUCTION                                    | 53  | 0.96260804 | -0.1588451 | -0.6040648 | 0.95475113 | 1     | 8765 | tags=100%, list=84%, signal=630% |
| BIOCARTA_HCMV_PATHWAY                                          | 16  | 0.9632091  | -0.2095854 | -0.5939847 | 0.9483471  | 1     | 1881 | tags=25%, list=18%, signal=30%   |
| KEGG_ETHER_LIPID_METABOLISM                                    | 24  | 0.9684162  | -0.536034  | -1.6793227 | 0.01652893 | 0.901 | 1256 | tags=29%, list=12%, signal=33%   |
| KEGG_STEROID_HORMONE_BIOSYNTHESIS                              | 36  | 0.9712469  | -0.1626338 | -0.5696579 | 0.9506438  | 1     | 8723 | tags=100%, list=84%, signal=615% |
| REACTOME_REGULATION_OF_SIGNALING_BY_CBL                        | 18  | 0.9726784  | -0.2150783 | -0.5706819 | 0.94273126 | 1     | 2328 | tags=33%, list=22%, signal=43%   |
| ST_INTERLEUKIN_4_PATHWAY                                       | 24  | 0.9731785  | -0.1789952 | -0.5737156 | 0.9527027  | 1     | 2144 | tags=21%, list=21%, signal=26%   |
| REACTOME_GLUCOSE_METABOLISM                                    | 59  | 0.974434   | -0.1678555 | -0.5549725 | 0.9466951  | 1     | 3182 | tags=32%, list=31%, signal=46%   |
| REACTOME_REGULATION_OF_IFNA_SIGNALING                          | 18  | 0.9753254  | -0.1950727 | -0.5571395 | 0.94893616 | 1     | 8383 | tags=100%, list=81%, signal=513% |
| KEGG_CARDIAC_MUSCLE_CONTRACTION                                | 60  | 0.98121786 | -0.1610573 | -0.5231097 | 0.9690522  | 1     | 3127 | tags=30%, list=30%, signal=43%   |
| REACTOME_FATTY_ACYL_COA_BIOSYNTHESIS                           | 15  | 0.9827331  | -0.2008589 | -0.5244379 | 0.9717172  | 1     | 2472 | tags=33%, list=24%, signal=44%   |
| REACTOME_RESPIRATORY_ELECTRON_TRANSPORT_ATP_SYNTHESIS_BY_CHEMI | 71  | 0.98346645 | -0.1996173 | -0.4959228 | 0.88645416 | 1     | 2694 | tags=27%, list=26%, signal=36%   |
| REACTOME_NEF_MEDIATES_DOWN_MODULATION_OF_CELL_SURFACE_RECEPT   | 18  | 0.98398423 | -0.1955613 | -0.5266373 | 0.960499   | 1     | 2779 | tags=39%, list=27%, signal=53%   |
| REACTOME_GLUONEOGENESIS                                        | 28  | 0.98442185 | -0.1705915 | -0.4995998 | 0.9793388  | 1     | 3182 | tags=36%, list=31%, signal=51%   |
| REACTOME_TRANSPORT_OF_GLUCOSE_AND_OTHER_SUGARS_BILE_SALTS_AND  | 62  | 0.9857973  | -0.1243341 | -0.5018296 | 0.9976744  | 1     | 3231 | tags=27%, list=31%, signal=40%   |
| REACTOME_GLYCOLYSIS                                            | 25  | 0.9955174  | -0.1401194 | -0.4095187 | 0.99782133 | 1     | 8955 | tags=100%, list=86%, signal=714% |
| KEGG_ARACHIDONIC_ACID_METABOLISM                               | 44  | 1          | -0.5109065 | -1.8251216 | 0.0043956  | 0.581 | 1862 | tags=32%, list=18%, signal=39%   |
| KEGG_HEMATOPOIETIC_CELL_LINEAGE                                | 75  | 1          | -0.542672  | -1.7855005 | 0.01856148 | 0.694 | 3526 | tags=67%, list=34%, signal=100%  |
| KEGG_CYTOKINE_CYTOKINE_RECEPTOR_INTERACTION                    | 210 | 1          | -0.4740979 | -1.7685441 | 0.00959233 | 0.745 | 3209 | tags=52%, list=31%, signal=74%   |
| REACTOME_FGFR_LIGAND_BINDING_AND_ACTIVATION                    | 18  | 1          | -0.5741548 | -1.7515368 | 0.01138952 | 0.783 | 1495 | tags=39%, list=14%, signal=45%   |
| REACTOME_CLASS_A1_RHODOPSIN_LIKE_RECEPTORS                     | 212 | 1          | -0.3859918 | -1.7313335 | 0.00539084 | 0.815 | 3904 | tags=50%, list=38%, signal=78%   |
| REACTOME_G_ALPHA_S_SIGNALING_EVENTS                            | 92  | 1          | -0.4321774 | -1.7220203 | 0.00977995 | 0.834 | 2553 | tags=36%, list=25%, signal=47%   |

# T6

VM, DVSc, DACVP  
of Comparative Pathology  
nary Medicine & Surgery  
07, Fax 713-794-4546  
@mdanderson.org  
Date: November 12, 2013

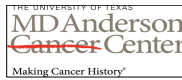

To: Dr. M. Barton, S. Jiang, K. Thakkar

## HISTOPATHOLOGY REPORT AND DIAGNOSIS

| Group                                                                                     | CONTROL      |              |                                                                               |              |                                                     |              | Summary                                             | TRIM24-1     |              |              |              |                                                                                                                        |              |                                                                                             |              |                                                                                                                        |              |                                                                                                 |                                                                                           |
|-------------------------------------------------------------------------------------------|--------------|--------------|-------------------------------------------------------------------------------|--------------|-----------------------------------------------------|--------------|-----------------------------------------------------|--------------|--------------|--------------|--------------|------------------------------------------------------------------------------------------------------------------------|--------------|---------------------------------------------------------------------------------------------|--------------|------------------------------------------------------------------------------------------------------------------------|--------------|-------------------------------------------------------------------------------------------------|-------------------------------------------------------------------------------------------|
|                                                                                           | 2586         | 2588         | 2589                                                                          | 2510         | 2549                                                | 2558         |                                                     | 2513         | 2515         | 2516         | 2517         | 2518                                                                                                                   | 2519         | 2520                                                                                        | 2531         | 2532                                                                                                                   | 2533         | 2534                                                                                            | 2535                                                                                      |
| Animal ID                                                                                 | 2586         | 2588         | 2589                                                                          | 2510         | 2549                                                | 2558         |                                                     | 2513         | 2515         | 2516         | 2517         | 2518                                                                                                                   | 2519         | 2520                                                                                        | 2531         | 2532                                                                                                                   | 2533         | 2534                                                                                            | 2535                                                                                      |
| Species                                                                                   | Mouse        | Mouse        | Mouse                                                                         | Mouse        | Mouse                                               | Mouse        |                                                     | Mouse        | Mouse        | Mouse        | Mouse        | Mouse                                                                                                                  | Mouse        | Mouse                                                                                       | Mouse        | Mouse                                                                                                                  | Mouse        | Mouse                                                                                           | Mouse                                                                                     |
| Genotype/Strain                                                                           | C57129       | C57129       | C57129                                                                        | C57129       | C57129                                              | C57129       |                                                     | C57129       | C57129       | C57129       | C57129       | C57129                                                                                                                 | C57129       | C57129                                                                                      | C57129       | C57129                                                                                                                 | C57129       | C57129                                                                                          | C57129                                                                                    |
| Sex                                                                                       |              |              |                                                                               |              |                                                     |              |                                                     |              |              |              |              |                                                                                                                        |              |                                                                                             |              |                                                                                                                        |              |                                                                                                 |                                                                                           |
| Age                                                                                       |              |              |                                                                               |              |                                                     |              |                                                     |              |              |              |              |                                                                                                                        |              |                                                                                             |              |                                                                                                                        |              |                                                                                                 |                                                                                           |
| Tumor weight (grams) or size (mm)                                                         |              |              |                                                                               |              |                                                     |              |                                                     |              |              |              |              |                                                                                                                        |              |                                                                                             |              |                                                                                                                        |              |                                                                                                 |                                                                                           |
| Observations                                                                              |              |              |                                                                               |              |                                                     |              |                                                     |              |              |              |              |                                                                                                                        |              |                                                                                             |              |                                                                                                                        |              |                                                                                                 |                                                                                           |
| Inc. Obs.                                                                                 |              |              |                                                                               |              |                                                     |              | Incidence or Average Score of lesions               |              |              |              |              |                                                                                                                        |              |                                                                                             |              |                                                                                                                        |              |                                                                                                 |                                                                                           |
| Organ Morphologic Diagnosis                                                               | Lesion Grade | Lesion Grade | Lesion Grade                                                                  | Lesion Grade | Lesion Grade                                        | Lesion Grade |                                                     | Lesion Grade                                                                                                           | Lesion Grade | Lesion Grade                                                                                | Lesion Grade | Lesion Grade                                                                                                           | Lesion Grade | Lesion Grade                                                                                    | Lesion Grade                                                                              |
| Xenograft tissue sample on the slide                                                      | P            | P            | P                                                                             | P            | P                                                   | P            | 6                                                   | P            | P            | P            | P            | P                                                                                                                      | P            | P                                                                                           | P            | P                                                                                                                      | P            | P                                                                                               | P                                                                                         |
| Dx: Fibrous tissue                                                                        | P            | P            |                                                                               |              |                                                     |              | 3                                                   |              |              |              |              |                                                                                                                        |              |                                                                                             |              |                                                                                                                        |              |                                                                                                 |                                                                                           |
| Dx: Epithelial cells intermixed with fibrous tissue                                       |              |              | P                                                                             | P            |                                                     |              | 3                                                   |              |              | P            | P            | P                                                                                                                      | P            | P                                                                                           | P            | P                                                                                                                      | P            | P                                                                                               | P                                                                                         |
| Epithelial cells (percent of epithelial cells from the total tumor mass)                  | 0            | 0            | 1                                                                             | 1            | 0                                                   | 1            | 0.5                                                 | 5            | 25           | 35           | 30           | 40                                                                                                                     | 40           | 30                                                                                          | 35           | 20                                                                                                                     | 35           | 1                                                                                               | 2                                                                                         |
| Fibrous tissue (percent fibrous tissue and collagen deposition from the total tumor mass) | 100          | 100          | 99                                                                            | 99           | 100                                                 | 99           | 99.5                                                | 95           | 75           | 65           | 70           | 60                                                                                                                     | 60           | 70                                                                                          | 65           | 80                                                                                                                     | 65           | 99                                                                                              | 98                                                                                        |
| Cellular atypia of neoplastic epithelial cells (grade 0-4)                                |              |              | 0                                                                             | 0            |                                                     | 0            | 0                                                   | 2            | 1            | 4            | 2            | 3                                                                                                                      | 4            | 2                                                                                           | 4            | 2                                                                                                                      | 3            | 0                                                                                               | 1                                                                                         |
| Anysokaryosis (grade 0-4)                                                                 |              |              | 0                                                                             | 0            |                                                     | 0            | 0                                                   | 1            | 1            | 3            | 2            | 3                                                                                                                      | 3            | 2                                                                                           | 3            | 3                                                                                                                      | 3            | 0                                                                                               | 2                                                                                         |
| Mitotic rate (total number of mitotic epithelial cells within the xenograft tumor)        |              |              | 0                                                                             | 0            |                                                     | 0            | 0                                                   | 1            | 0            | 3            | 0            | 2                                                                                                                      | 2            | 0                                                                                           | 0            | 0                                                                                                                      | 1            | 0                                                                                               | 1                                                                                         |
| Vascularization (grade 1-4)                                                               | 1            | 1            | 1                                                                             | 1            | 1                                                   | 1            | 1                                                   | 1            | 2            | 2            | 1            | 2                                                                                                                      | 2            | 2                                                                                           | 2            | 2                                                                                                                      | 2            | 2                                                                                               | 2                                                                                         |
| Grade of malignancy (grade 0-3)                                                           | 0            | 0            | 0                                                                             | 0            | 0                                                   | 0            | 0                                                   | 1            | 1            | 3            | 2            | 2                                                                                                                      | 3            | 2                                                                                           | 3            | 2                                                                                                                      | 2            | 0                                                                                               | 1                                                                                         |
| Inflammation                                                                              | P            | P            | P                                                                             | P            | P                                                   |              | 5                                                   | P            | P            | P            | P            | P                                                                                                                      | P            | P                                                                                           | P            | P                                                                                                                      | P            | P                                                                                               | P                                                                                         |
| Infiltration of Neutrophils and/or Macrophages                                            | 1            | 1            | 1                                                                             | 1            | 2                                                   |              | 1,2                                                 | 3            | 2            | 3            | 3            | 2                                                                                                                      | 3            | 2                                                                                           | 2            | 4                                                                                                                      | 4            | 3                                                                                               | 2                                                                                         |
| Infiltration of Lymphocytes                                                               | 0            | 0            | 0                                                                             | 0            | 0                                                   |              | 0                                                   | 1            | 1            | 2            | 1            | 2                                                                                                                      | 2            | 1                                                                                           | 3            | 3                                                                                                                      | 1            | 0                                                                                               | 0                                                                                         |
| Additional Observations                                                                   |              |              | there are 3 small nests of epithelial cells composed of 7-18 epithelial cells |              | there is a single small nest of 11 epithelial cells |              | there is a single small nest of 13 epithelial cells |              |              |              |              | There is evidence of infiltration of neoplastic epithelial cells into surrounding tissue at the periphery of the tumor |              | there is minimal infiltration of neoplastic epithelial cells at the periphery of tumor mass |              | There is evidence of infiltration of neoplastic epithelial cells into surrounding tissue at the periphery of the tumor |              | There is minimal infiltration of neoplastic epithelial cells at the periphery of the tumor mass | I think this is a sampling error and probably should be excluded from this group analysis |

\*Note: No tissue was obtained for 2 more Control mice

### LEGEND

N = Normal tissue or No significant lesion observed  
P = The lesion is present

### Cellular Atypia

0 = normal cells  
minimal atypia (minimal nuclear hyperchromasia and pleomorphism)  
1 = mild atypia (mild nuclear hyperchromasia and pleomorphism)  
2 = moderate nuclear hyperchromasia and pleomorphism  
3 = marked nuclear hyperchromasia and pleomorphism  
4 = marked nuclear hyperchromasia and pleomorphism

### Anisokaryosis

0 = normal (uniform) size of nuclei  
1 = 1-fold variation in the size of nuclei  
2 = 2-fold variation in the size of nuclei  
3 = 3-fold variation in the size of nuclei  
4 = 4- or more folds variation in the size of nuclei

### Grade of Malignancy

0 = no evidence of anaplasia or malignancy  
1 = with mild cellular atypia, mild nuclear hyperchromatism and pleomorphism, 1-2 folds anisokaryosis, and no evidence of invasion/infiltration  
2 = moderate cellular atypia, moderate nuclear hyperchromatism and pleomorphism, and 2-3 fold anisokaryosis, and no or minimal evidence of invasion/infiltration  
3 = marked cellular atypia, marked nuclear hyperchromatism and pleomorphism, and 4 or more folds anisokaryosis, and presence of invasion/infiltration

### GRADING/SCORING OF OTHER HISTOLOGICAL LESIONS

Grade 0 = no histologic lesion  
1 = minimal, rare, occasional (or affects less than 10% of the tissue)  
2 = mild, slight, infrequent, random, sporadic (or affects 10-20% of tissue)  
3 = moderate, frequent, typical, common (or affects 20-40% of tissue)  
4 = marked, extensive, numerous, severe (or affects 40-100% of tissue)

To: Dr. M. Barton, S. Jiang, K. Thakkar

HISTOPATHOLOGY REPORT AND DIAGNOSIS

| Group                             |                                                                                           | Summary                               | TRIM24-2                                                                             |              |              |                                                                            |              |                                                                                                 |              |              |              |              |              |                               |                                       | Summary |
|-----------------------------------|-------------------------------------------------------------------------------------------|---------------------------------------|--------------------------------------------------------------------------------------|--------------|--------------|----------------------------------------------------------------------------|--------------|-------------------------------------------------------------------------------------------------|--------------|--------------|--------------|--------------|--------------|-------------------------------|---------------------------------------|---------|
| Animal ID                         |                                                                                           | 2528                                  | 2521                                                                                 | 2522         | 2525         | 2526                                                                       | 2527         | 2529                                                                                            | 2530         | 2536         | 2537         | 2540         | 2541         | 2542                          |                                       |         |
| Species                           |                                                                                           | Mouse                                 | Mouse                                                                                | Mouse        | Mouse        | Mouse                                                                      | Mouse        | Mouse                                                                                           | Mouse        | Mouse        | Mouse        | Mouse        | Mouse        | Mouse                         |                                       |         |
| Genotype/Strain                   |                                                                                           | C57/129                               | C57/129                                                                              | C57/129      | C57/129      | C57/129                                                                    | C57/129      | C57/129                                                                                         | C57/129      | C57/129      | C57/129      | C57/129      | C57/129      | C57/129                       |                                       |         |
| Sex                               |                                                                                           |                                       |                                                                                      |              |              |                                                                            |              |                                                                                                 |              |              |              |              |              |                               |                                       |         |
| Age                               |                                                                                           |                                       |                                                                                      |              |              |                                                                            |              |                                                                                                 |              |              |              |              |              |                               |                                       |         |
| Tumor weight (grams) or size (mm) |                                                                                           |                                       |                                                                                      |              |              |                                                                            |              |                                                                                                 |              |              |              |              |              |                               |                                       |         |
| Observations                      |                                                                                           |                                       |                                                                                      |              |              |                                                                            |              |                                                                                                 |              |              |              |              |              |                               |                                       |         |
| Inc. Obs.                         | Organ Morphologic Diagnosis                                                               | Incidence or Average Score of lesions | Lesion Grade                                                                         | Lesion Grade | Lesion Grade | Lesion Grade                                                               | Lesion Grade | Lesion Grade                                                                                    | Lesion Grade | Lesion Grade | Lesion Grade | Lesion Grade | Lesion Grade | Lesion Grade                  | Incidence or Average Score of lesions |         |
|                                   | Xenograft tissue sample on the slide                                                      | 12                                    | P                                                                                    | P            | P            | P                                                                          | P            | P                                                                                               | P            | P            | P            | P            | P            | P                             | 12                                    |         |
|                                   | Dx: Fibrous tissue                                                                        | 12                                    | P                                                                                    | P            | P            | P                                                                          | P            | P                                                                                               | P            | P            | P            | P            | P            | P                             | 12                                    |         |
|                                   | Dx: Epithelial cells intermixed with fibrous tissue                                       | 12                                    | P                                                                                    | P            | P            | P                                                                          | P            | P                                                                                               | P            | P            | P            | P            | P            | P                             | 12                                    |         |
|                                   | Epithelial cells (percent of epithelial cells from the total tumor mass)                  | 24.8                                  | 50                                                                                   | 40           | 35           | 20                                                                         | 35           | 1                                                                                               | 35           | 20           | 25           | 35           | 60           | 25                            | 31.8                                  |         |
|                                   | Fibrous tissue (percent fibrous tissue and collagen deposition from the total tumor mass) | 75.2                                  | 50                                                                                   | 60           | 65           | 80                                                                         | 65           | 99                                                                                              | 65           | 80           | 75           | 65           | 40           | 75                            | 68.3                                  |         |
|                                   | Cellular atypia of neoplastic epithelial cells (grade 0-4)                                | 2.3                                   | 4                                                                                    | 4            | 4            | 2                                                                          | 4            | 1                                                                                               | 4            | 2            | 3            | 4            | 4            | 3                             | 3.3                                   |         |
|                                   | Anysokaryosis (grade 0-4)                                                                 | 2.2                                   | 3                                                                                    | 3            | 3            | 3                                                                          | 3            | 1                                                                                               | 4            | 2            | 3            | 4            | 4            | 3                             | 3.0                                   |         |
|                                   | Mitotic rate (total number of mitotic epithelial cells within the xenograft tumor)        | 0.8                                   | 0                                                                                    | 2            | 2            | 1                                                                          | 0            | 0                                                                                               | 0            | 0            | 2            | 0            | 0            | 0                             | 0.6                                   |         |
|                                   | Vascularization (grade 1-4)                                                               | 1.8                                   | 2                                                                                    | 2            | 2            | 1                                                                          | 2            | 1                                                                                               | 2            | 1            | 1            | 2            | 2            | 2                             | 1.7                                   |         |
|                                   | <b>Grade of malignancy (grade 0-3)</b>                                                    | <b>1.8</b>                            | <b>3</b>                                                                             | <b>3</b>     | <b>3</b>     | <b>1</b>                                                                   | <b>3</b>     | <b>0</b>                                                                                        | <b>3</b>     | <b>1</b>     | <b>2</b>     | <b>3</b>     | <b>3</b>     | <b>2</b>                      | <b>2.3</b>                            |         |
|                                   | Inflammation                                                                              | 12                                    | P                                                                                    | P            | P            | P                                                                          | P            | P                                                                                               | P            | P            | P            | P            | P            | P                             | 12                                    |         |
|                                   | Infiltration of Neutrophils and/or Macrophages                                            | 3                                     | 2                                                                                    | 2            | 1            | 1                                                                          | 2            | 1                                                                                               | 2            | 1            | 3            | 3            | 3            | 2                             | 2                                     |         |
|                                   | Infiltration of Lymphocytes                                                               | 1                                     | 3                                                                                    | 2            | 2            | 1                                                                          | 0            | 0                                                                                               | 0            | 0            | 1            | 3            | 0            | 2                             | 1                                     |         |
|                                   | Additional Observations                                                                   |                                       | There is no xenograft tumor in this slide, but only normal fibroadipose mouse tissue |              |              | there is minimal focal infiltration of tumor cells into surrounding tissue |              | There is ectasia/dilation of the medullary sinuses and moderate plasmacytosis of the lymph node |              |              |              |              |              | There is evidence of invasion | There is evidence of invasion         |         |

**LEGEND**  
N = Normal tissue or No significant lesion observed  
P = The lesion is present

**Cellular Atypia**  
0 = normal cells  
minimal atypia (minimal nuclear hyperchromasia and pleomorphism)  
1 = mild atypia (mild nuclear hyperchromasia and pleomorphism)  
moderate atypia (moderate nuclear hyperchromasia and pleomorphism)  
marked atypia (marked nuclear hyperchromasia and pleomorphism)

**Anisokaryosis**  
0 = normal (uniform) size of nuclei  
1 = 1-fold variation in the size of nuclei  
2 = 2-fold variation in the size of nuclei  
3 = 3-fold variation in the size of nuclei  
4 = 4- or more folds variation in the size of nuclei

**Grade of Malignancy**  
0 = no evidence of neoplasia or malignancy  
I = with mild cellular atypia, mild nuclear hyperchromatism  
II = moderate cellular atypia, moderate nuclear hyperchromatism  
III = marked cellular atypia, marked nuclear hyperchromatism

**GRADING/SCORING OF OTHER HISTOLOGICAL LESIONS**  
Grade 0 = no histologic lesion  
lesion is minimal, rare, occasional (or affects less than 10%)  
lesion is mild, slight, infrequent, random, sporadic (or affects less than 25%)  
lesion is moderate, frequent, typical, common (or affects 25-50%)  
lesion is marked, extensive, numerous, severe (or affects 50-100%)

**T7****Cloning Primers**

|                  |                                  |
|------------------|----------------------------------|
| <b>TRIM24-F1</b> | ATTTTACACGTGATGGAGGTGGCGGTGGAGAA |
| <b>TRIM24-R1</b> | CGGGGCTCTAGATTATTTAAGCAACTGGCGTT |

**qRT-PCR primers**

| <b>Gene</b>    | <b>Species</b> | <b>Forward primer</b>       | <b>Reverse primer</b>         |
|----------------|----------------|-----------------------------|-------------------------------|
| TRIM24         | Human          | GTGGATCAGCAAGCAGGAG         | TTTGTCAAGAAAGGTTGTAACG        |
| $\beta$ -ACTIN | Human          | GGACTTCGAGCAAGAGATGG        | AGCACTGTGTTGGCGTACAG          |
| TP53           | Human          | AAAGAAGAAACCACTGGATG        | ATTCAGCTCTCGGAACAT            |
| GLUT1          | Human          | CCA GCT GCC ATT GCC GTT     | GAC GTA GGG ACC ACA CAG TTGC  |
| GLUT4          | Human          | GTCGGGCTTCCAACAGATAG        | ACCCCAATGTTGTACCCAAA          |
| HK2            | Human          | ATG AGG GGC GGA TGT GTA TCA | GGT TCA GTG AGC CCA TGT CAA   |
| ENO1           | Human          | AAA GCT GGT GCC GTT GAG AAG | AGC ATG AGA ACC GCC ATT GAT   |
| ALDO-A         | Human          | GGG TGT CAT CCT CTT CCA TGA | GAC CAC GCC CTT GTC TAC CTT   |
| PGM1           | Human          | ACC CAC TCC CTT CAT ACAATC  | CTC CTC ACT GGT CAT GGC TTA   |
| PDK1           | Human          | CCG CTC TCC ATG AAG CAG TT  | TTG CCG CAG AAA CAT AAA TGA G |
| GPI            | Human          | GGT ACA CAG GCA AGA CCA TC  | GTT TTG GCA ATG TGA GTT CC    |
| PKM1           | Human          | CGAGCCTCAAGTCACTCCAC        | GTGAGCAGACCTGCCAGACT          |
| PKM2           | Human          | ATTATTTGAGGAACTCCGCCGCT     | ATTCCGGGTCACAGCAATGATGG       |
| LDHC           | Human          | CCTCTTGGGCTATTGGACTG30      | GCCTCCTCCTCAGAATTCAA30        |
| ACO1           | Human          | TTGGAGGATTCAAGATATGG        | ACTCATCACAATTCCGAAT           |
| DLAT           | Human          | GTTCCCTACAGGTGTCTTC         | AAGGTAATAATGAGGTATGGT         |
| IDH1           | Human          | GAGATAACCTACACACCAAGT       | AACACCACCACCTTCTTC            |
| IDH2           | Human          | GATGGATGGTGATGAGAT          | AAATACTTTAGCTGGATGTC          |
| MDH2           | Human          | TGTGATGTGGTAGTTATTCC        | ATTGGTGTGAAACAGGTC            |
| OGDH           | Human          | AATGTCATCAGGAAGGAG          | GGTGGTACTTCACATCTC            |
| PDHA1          | Human          | ATGTATGCCAAGAACTTC          | ATTATACTTACAGGCTAGAG          |
| PDHB           | Human          | AGGAGTTGAATGTGAGGTGATAA     | ATGACACTGGCTTCTATGGT          |
| SDHA           | Human          | ATGCCATCCACTACATGA          | ATAAATCTCCCATCTTCAGTT         |
| SDHB           | Human          | GACACCAACCTCAATAAG          | GATTCATCCTTCTTCTTCAA          |
| SDHD           | Human          | ACCGACCTATCCCAGAATG         | CAGCCTTGGAGCCAGAAT            |
| FH             | Human          | TTAAGATTGGAGGTGTGA          | CATAATCCTGGTTTACTTCA          |



| T8                                |                |                   |                    |
|-----------------------------------|----------------|-------------------|--------------------|
| <b>Antibody details (Catalog)</b> | <b>Species</b> | <b>Company</b>    | <b>Application</b> |
| TRIM24 (NB100-2597)               | Rabbit         | Novus Biologicals | Western            |
| TRIM24 (14208-1-AP)               | Rabbit         | Protein tech      | IHC                |
| p53(DO1)-HRP (sc-126)             | Mouse          | Santa Cruz        | Western            |
| $\beta$ -Actin- HRP (5125)        | Rabbit         | Cell Signaling    | Western            |
| Hexokinase II (2687)              | Rabbit         | Cell Signaling    | Western            |
| Aldolase (3188)                   | Rabbit         | Cell Signaling    | Western            |
| Enolase -1 (3810)                 | Rabbit         | Cell Signaling    | Western            |
| PDHK1 (3820)                      | Rabbit         | Cell Signaling    | Western            |
| LDHA/ LDHC (3538)                 | Rabbit         | Cell Signaling    | Western            |
| PGM1 (ab55616)                    | Mouse          | Abcam             | Western            |
